# Supplementary material for: Maternal healthcare coverage for first pregnancies in adolescent girls: a systematic comparison with adult mothers in household surveys across 105 countries, 2000–2019
Source: PubMed Central journal article supplement — BMJ Glob Health. 2020 Oct 9;5(10):e002373. doi: 10.1136/bmjgh-2020-002373 (PMC7549484; doi:10.1136/bmjgh-2020-002373), 2020-10-09
Supplement: bmjgh-2020-002373supp001.pdf [file bmjgh-2020-002373supp001.pdf]

**Maternal health care coverage for first pregnancies in adolescent girls: a systematic comparison with adult mothers in household surveys across 105 countries between 2000 and 2019**

**Appendix Table 1. Data sources of the countries involved in this study, 283 surveys**

| Country                  | Round1 (2000-2006)  | Round2 (2007-2012)           | Round3 (2013-2019)  |
|--------------------------|---------------------|------------------------------|---------------------|
| Afghanistan              |                     | MICS 2010                    | DHS 2015            |
| Albania                  |                     | DHS 2008                     | DHS 2017            |
| Algeria                  | MICS 2006           | MICS 2012                    |                     |
| Angola                   |                     |                              | DHS 2015            |
| Argentina                |                     | MICS 2011                    |                     |
| Armenia                  | DHS 2000, DHS 2005  | DHS 2010                     | DHS 2015            |
| Azerbaijan               | DHS 2006            |                              |                     |
| Bangladesh               | DHS 2004            | DHS 2006, DHS 2007, DHS 2011 | DHS 2014            |
| Belarus                  | MICS 2005           | MICS 2012                    |                     |
| Belize                   | MICS 2006           | DHS 2011                     | MICS 2015           |
| Benin                    | DHS 2001, DHS 2006  | DHS 2011                     | MICS 2014, DHS 2018 |
| Bhutan                   |                     | MICS 2010                    |                     |
| Bolivia                  | DHS 2003            | DHS 2008                     |                     |
| Bosnia and Herzegovina   | MICS 2006           |                              |                     |
| Burkina Faso             | DHS 2003, MICS 2006 | DHS 2010                     |                     |
| Burundi                  | MICS 2005           | DHS 2010                     | DHS 2016            |
| Cambodia                 | DHS 2000, DHS 2005  | DHS 2010                     | DHS 2014            |
| Cameroon                 | DHS 2004, MICS 2006 | DHS 2011                     | MICS 2014           |
| Central African Republic | MICS 2006           | DHS 2010                     |                     |
| Chad                     | DHS 2004            | MICS 2010                    | DHS 2014            |
| Colombia                 | DHS 2000, DHS 2005  |                              | DHS 2015            |
| Comoros                  |                     | DHS 2012                     |                     |
| Congo, Dem. Rep.         | MICS 2001           | DHS 2007, MICS 2010          | DHS 2013            |
| Congo                    | DHS 2005            | DHS 2011                     | MICS 2014           |
| Costa Rica               |                     | MICS 2011                    |                     |
| Côte d'Ivoire            | MICS 2006           | DHS 2012                     | MICS 2016           |
| Cuba                     |                     |                              | MICS 2014           |
| Djibouti                 | MICS 2006           |                              |                     |
| Dominican Republic       | DHS 2002            | DHS 2007                     | DHS 2013, MICS 2014 |
| Egypt                    | DHS 2000, DHS 2005  | DHS 2008                     | DHS 2014            |
| El Salvador              |                     |                              | MICS 2014           |
| Ethiopia                 | DHS 2000, DHS 2005  | DHS 2011                     | DHS 2016            |
| Gabon                    | DHS 2000            |                              | DHS 2012            |
| Gambia                   | MICS 2000           | MICS 2010                    | DHS 2013, MICS 2018 |
| Georgia                  | MICS 2005           |                              |                     |
| Ghana                    | DHS 2003, MICS 2006 | DHS 2008, MICS 2011          | DHS 2014            |
| Guatemala                |                     |                              | DHS 2015            |
| Guinea                   | DHS 2005            | DHS 2012                     | MICS 2016, DHS 2018 |
| Guinea-Bissau            | MICS 2006           | MICS 2010                    | MICS 2014           |

**Appendix Table 1. Data sources of the countries involved in this study, 283 surveys (continued)**

| Country                | Round1 (2000-2006)            | Round2 (2007-2012)             | Round3 (2013-2017)            |
|------------------------|-------------------------------|--------------------------------|-------------------------------|
| Guyana                 | MICS 2006                     | DHS 2009                       | MICS 2014                     |
| Haiti                  | DHS 2000, DHS 2006            | DHS 2012                       | DHS 2016                      |
| Honduras               | DHS 2006                      | DHS 2012                       |                               |
| India                  | DHS 2006                      |                                | DHS 2015                      |
| Indonesia              | DHS 2002                      | DHS 2007                       | DHS 2017                      |
| Iraq                   | MICS 2006                     | MICS 2011                      | MICS 2018                     |
| Jamaica                | MICS 2005                     | MICS 2011                      |                               |
| Jordan                 | DHS 2002                      | DHS 2007, DHS 2012             | DHS 2017                      |
| Kazakhstan             | MICS 2006                     | MICS 2010                      | MICS 2015                     |
| Kenya                  | DHS 2003                      | DHS 2008                       | DHS 2014                      |
| Kosovo                 |                               |                                | MICS 2014                     |
| Kyrgyzstan             | MICS 2005                     | DHS 2012                       | MICS 2014, MICS 2018          |
| Lao PDR                | MICS 2006                     | MICS 2011                      | MICS 2017                     |
| Lebanon (Palestinians) | MICS 2005                     | MICS 2011                      |                               |
| Lesotho                | DHS 2004                      | DHS 2009                       | DHS 2014, MICS 2018           |
| Liberia                |                               | DHS 2007                       | DHS 2013                      |
| Madagascar             | DHS 2003                      | DHS 2008                       |                               |
| Malawi                 | DHS 2000, DHS 2004, MICS 2006 | DHS 2010                       | MICS 2013, DHS 2015           |
| Maldives               |                               | DHS 2009                       | DHS 2017                      |
| Mali                   | DHS 2001, DHS 2006            | MICS 2009, DHS 2012            | MICS 2015, DHS 2018           |
| Mauritania             |                               | MICS 2007, MICS 2011           | MICS 2015                     |
| Mexico                 |                               |                                | MICS 2015                     |
| Moldova                | DHS 2005                      | MICS 2012                      |                               |
| Mongolia               | MICS 2005                     | MICS 2010                      | MICS 2013, MICS 2018          |
| Montenegro             |                               |                                | MICS 2013, MICS 2018          |
| Morocco                | DHS 2003                      |                                |                               |
| Mozambique             | DHS 2003                      | MICS 2008, DHS 2011            |                               |
| Myanmar                |                               | MICS 2009                      | DHS 2015                      |
| Namibia                | DHS 2000                      | DHS 2006                       | DHS 2013                      |
| Nepal                  | DHS 2001, DHS 2006            | DHS 2011                       | MICS 2014, DHS 2016           |
| Nicaragua              | DHS 2001                      |                                |                               |
| Niger                  | DHS 2006                      | DHS 2012                       |                               |
| Nigeria                | DHS 2003                      | MICS 2007, DHS 2008, MICS 2011 | DHS 2013, MICS 2016, DHS 2018 |
| Pakistan               |                               | DHS 2006, DHS 2012             | DHS 2018                      |
| Paraguay               |                               |                                | MICS 2016                     |

**Appendix Table 1. Data sources of the countries involved in this study, 283 surveys (continued)**

| Country                                   | Round1 (2000-2006)  | Round2 (2007-2012)                               | Round3 (2013-2017)             |
|-------------------------------------------|---------------------|--------------------------------------------------|--------------------------------|
| Peru                                      | DHS 2000, DHS 2006  | DHS 2008, DHS 2009, DHS 2010, DHS 2011, DHS 2012 |                                |
| Philippines                               | DHS 2003            | DHS 2008                                         | DHS 2013, DHS 2017             |
| Rwanda                                    | DHS 2000, DHS 2005  | DHS 2010                                         | DHS 2015                       |
| Sao Tome and Principe                     |                     | DHS 2008                                         | MICS 2014                      |
| Senegal                                   | DHS 2005            | DHS 2010, DHS 2012                               | DHS 2014, DHS 2016, DHS 2017   |
| Serbia                                    | MICS 2005           | MICS 2010                                        | MICS 2014                      |
| Sierra Leone                              | DHS 2005            | DHS 2008, MICS 2010                              | DHS 2013, MICS 2017            |
| Somalia                                   | MICS 2006           |                                                  |                                |
| South Sudan                               |                     | MICS 2010                                        |                                |
| Sudan                                     |                     |                                                  | MICS 2014                      |
| Suriname                                  | MICS 2006           | MICS 2010                                        | MICS 2018                      |
| Swaziland                                 |                     |                                                  | MICS 2014                      |
| Syria                                     |                     | MICS 2006                                        |                                |
| Tajikistan                                | MICS 2005           | DHS 2012                                         | DHS 2017                       |
| Tanzania                                  | DHS 2004            | DHS 2010                                         | DHS 2015                       |
| Thailand                                  | MICS 2005           | MICS 2012                                        | MICS 2015                      |
| The former Yugoslav Republic of Macedonia | MICS 2005           |                                                  |                                |
| Timor-Leste                               |                     | DHS 2009                                         | DHS 2016                       |
| Togo                                      | MICS 2006           | MICS 2010                                        | DHS 2013                       |
| Tunisia                                   |                     |                                                  | MICS 2018                      |
| Turkey                                    | DHS 2003            |                                                  |                                |
| Turkmenistan                              | MICS 2006           |                                                  | MICS 2015                      |
| Uganda                                    | DHS 2000, DHS 2006  | DHS 2011                                         | DHS 2016                       |
| Ukraine                                   | MICS 2005           | DHS 2007, MICS 2012                              |                                |
| Uzbekistan                                | MICS 2006           |                                                  |                                |
| Vanuatu                                   |                     | MICS 2007                                        |                                |
| Vietnam                                   | DHS 2002, MICS 2006 | MICS 2010                                        | MICS 2013                      |
| West Bank and Gaza Strip                  |                     |                                                  | MICS 2014                      |
| Yemen                                     |                     | MICS 2006                                        | DHS 2013                       |
| Zambia                                    | DHS 2001            | DHS 2007                                         | DHS 2013                       |
| Zimbabwe                                  | DHS 2005            | DHS 2010                                         | MICS 2014, DHS 2015, MICS 2019 |

**Appendix Table 2. Estimates of overall levels of maternal service coverage, levels by maternal age, and absolute inequality between the two age groups, using the most recent available survey data since 2010 for 105 countries<sup>1</sup>**

|                                 | First antenatal care in the first trimester |                    |                  |                  |                                         | Delivery in a health facility |                    |                  |                  |                                         |
|---------------------------------|---------------------------------------------|--------------------|------------------|------------------|-----------------------------------------|-------------------------------|--------------------|------------------|------------------|-----------------------------------------|
|                                 | Number of countries                         | Overall (15-34, %) | 15-19 (%)        | 20-34 (%)        | Absolute inequality (percentage points) | Number of countries           | Overall (15-34, %) | 15-19 (%)        | 20-34 (%)        | Absolute inequality (percentage points) |
| All available countries         | 77                                          | 63.1(62.9, 63.3)   | 59.0(58.7, 59.3) | 64.5(64.3, 64.7) | 5.5(5.2, 5.8)                           | 86                            | 71.8(71.7, 71.9)   | 68.4(68.1, 68.7) | 72.3(72.1, 72.5) | 3.9(3.6, 4.3)                           |
| WHO regions                     |                                             |                    |                  |                  |                                         |                               |                    |                  |                  |                                         |
| Africa                          | 37                                          | 23.9(23.7, 24.1)   | 22.5(22.2, 22.8) | 25.3(25.1, 25.5) | 2.8(2.6, 3.0)                           | 40                            | 46.4(46.2, 46.6)   | 42.9(42.4, 43.4) | 47.7(47.4, 48.0) | 4.8(4.2, 5.4)                           |
| Americas                        | 12                                          | 73.6(73.2, 74.0)   | 63.5(62.9, 64.1) | 75.6(75.1, 76.1) | 12.0(11.7, 12.4)                        | 15                            | 81.8(81.5, 82.1)   | 81.7(81.2, 82.2) | 82.3(81.9, 82.7) | 0.5(0.3, 0.8)                           |
| Eastern Mediterranean           | 8                                           | 50.1(49.7, 50.5)   | 48.5(47.9, 49.1) | 51.3(50.8, 51.8) | 2.8(2.3, 3.3)                           | 8                             | 52.1(51.7, 52.5)   | 50.6(49.9, 51.3) | 52.8(52.3, 53.3) | 2.2(1.6, 2.8)                           |
| Europe                          | 8                                           | 71.4(70.7, 72.1)   | 65.8(64.8, 66.8) | 71.6(70.9, 72.3) | 5.8(5.1, 6.5)                           | 10                            | 93.2(92.8, 93.6)   | 92.5(91.7, 93.3) | 93.5(93.0, 94.0) | 1.0(0.5, 1.5)                           |
| South-East Asia                 | 7                                           | 57.6(56.7, 58.5)   | 54.3(53.0, 55.6) | 60.9(59.9, 61.9) | 6.6(5.9, 7.2)                           | 8                             | 50.8(50.3, 51.3)   | 48.6(47.6, 49.6) | 51.6(50.9, 52.3) | 3.0(2.3, 3.7)                           |
| Western Pacific                 | 5                                           | 63.2(62.1, 64.3)   | 54.3(52.7, 55.9) | 64.2(63.0, 65.4) | 9.9(9.0, 10.9)                          | 5                             | 66.0(65.3, 66.7)   | 58.6(57.3, 59.9) | 67.2(66.3, 68.1) | 8.7(7.5, 9.8)                           |
| Country-income class            |                                             |                    |                  |                  |                                         |                               |                    |                  |                  |                                         |
| Low-income                      | 26                                          | 36.8(36.6, 37.0)   | 33.0(32.7, 33.3) | 38.1(37.9, 38.3) | 5.1(4.9, 5.3)                           | 28                            | 40.3(40.2, 40.4)   | 38.4(38.1, 38.7) | 41.3(41.1, 41.5) | 2.9(2.5, 3.3)                           |
| Lower-middle income             | 33                                          | 59.4(59.0, 59.8)   | 54.9(54.3, 55.5) | 60.4(59.9, 60.9) | 5.5(5.1, 5.8)                           | 35                            | 64.1(63.8, 64.4)   | 60.1(59.6, 60.6) | 65.1(64.7, 65.5) | 5.1(4.6, 5.6)                           |
| Upper-middle income             | 18                                          | 76.1(75.7, 76.5)   | 65.6(65.0, 66.2) | 78.4(77.9, 78.9) | 12.8(12.0, 13.7)                        | 23                            | 93.1(92.8, 93.4)   | 92.2(91.5, 92.9) | 93.3(92.8, 93.8) | 1.1(0.7, 1.4)                           |
| SSA category <sup>2</sup>       |                                             |                    |                  |                  |                                         |                               |                    |                  |                  |                                         |
| Non-SSA                         | 40                                          | 69.1(68.7, 69.5)   | 64.8(64.2, 65.4) | 71.7(71.2, 72.2) | 6.9(6.6, 7.2)                           | 46                            | 77.9(77.6, 78.2)   | 75.4(74.8, 76.0) | 78.7(78.3, 79.1) | 3.3(3.0, 3.6)                           |
| SSA                             | 37                                          | 23.9(23.7, 24.1)   | 22.5(22.2, 22.8) | 25.3(25.1, 25.5) | 2.8(2.6, 3.0)                           | 38                            | 45.2(45.1, 45.3)   | 41.9(41.6, 42.2) | 46.6(46.4, 46.8) | 4.7(4.2, 5.3)                           |
| Countdown category <sup>3</sup> |                                             |                    |                  |                  |                                         |                               |                    |                  |                  |                                         |
| Non-countdown                   | 18                                          | 71.9(71.5, 72.3)   | 64.2(63.6, 64.8) | 73.1(72.6, 73.6) | 8.9(8.2, 9.6)                           | 23                            | 84.5(84.2, 84.8)   | 80.3(79.6, 81.0) | 85.0(84.5, 85.5) | 4.7(4.1, 5.3)                           |
| Countdown                       | 59                                          | 44.5(44.3, 44.7)   | 41.7(41.4, 42.0) | 46.8(46.6, 47.0) | 5.1(4.9, 5.3)                           | 63                            | 48.5(48.3, 48.7)   | 46.0(45.7, 46.3) | 49.5(49.3, 49.7) | 3.6(3.2, 3.9)                           |

**Note:**

1. “Absolute inequality” is the Absolute inequality in reproductive service utilizations between adult mothers aged 20-34 years old and adolescents 15-19 years old.
2. The country’s income class is from the World Bank for the year that the data was collected.
3. “SSA” represents “Sub-Saharan African countries”. The list of sub-Saharan African countries could be found from here: <https://www.loc.gov/tr/amed/guide/afr-countrylist.html>.
4. “Countdown countries” are the 75 countries where more than 95% of all maternal and child deaths occur, including the 49 lowest-income countries. All Countdown profiles are available at [[www.countdown2015mnch.org/country-profiles](http://www.countdown2015mnch.org/country-profiles)]. We involved all Countdown countries with available data from DHS/MICS surveys conducted since 2010.

**Appendix Table 3. Relative inequality between adult mothers and adolescents, using most recent available survey, 105 countries<sup>1,2</sup>**

|                       | <b>Four or more antenatal care visits</b> | <b>First antenatal care in the first trimester</b> | <b>Delivery with skilled birth attendant</b> | <b>Delivery in health facilities</b> | <b>Postnatal checkup within 24 hours after delivery</b> |
|-----------------------|-------------------------------------------|----------------------------------------------------|----------------------------------------------|--------------------------------------|---------------------------------------------------------|
| World                 | 1.12(1.10, 1.14)                          | 1.09(1.07, 1.11)                                   | 1.05(1.04, 1.07)                             | 1.06(1.04, 1.08)                     | 1.11(1.07, 1.14)                                        |
| WHO regions           |                                           |                                                    |                                              |                                      |                                                         |
| Africa                | 1.20(1.18, 1.22)                          | 1.12(1.10, 1.15)                                   | 1.12(1.09, 1.14)                             | 1.11(1.08, 1.14)                     | 1.15(1.10, 1.20)                                        |
| Americas              | 1.07(1.05, 1.10)                          | 1.19(1.16, 1.22)                                   | 1.01(1.00, 1.02)                             | 1.01(0.99, 1.03)                     | 1.06(1.04, 1.08)                                        |
| Eastern Mediterranean | 1.13(1.10, 1.16)                          | 1.06(1.02, 1.09)                                   | 1.03(1.00, 1.06)                             | 1.04(1.01, 1.07)                     | 1.10(1.04, 1.15)                                        |
| Europe                | 1.07(1.04, 1.10)                          | 1.09(1.06, 1.12)                                   | 1.01(1.00, 1.02)                             | 1.01(0.99, 1.03)                     | 1.13(1.11, 1.15)                                        |
| South-East Asia       | 1.15(1.11, 1.20)                          | 1.12(1.10, 1.14)                                   | 1.04(1.03, 1.06)                             | 1.06(1.05, 1.08)                     | 1.11(1.08, 1.14)                                        |
| Western Pacific       | 1.16(1.13, 1.19)                          | 1.18(1.10, 1.27)                                   | 1.10(1.08, 1.13)                             | 1.15(1.12, 1.17)                     | 1.07(1.03, 1.12)                                        |
| Income class          |                                           |                                                    |                                              |                                      |                                                         |
| Low-income            | 1.16(1.13, 1.19)                          | 1.15(1.13, 1.18)                                   | 1.06(1.02, 1.09)                             | 1.08(1.04, 1.11)                     | 1.12(1.05, 1.19)                                        |
| Lower-middle income   | 1.17(1.13, 1.20)                          | 1.10(1.07, 1.13)                                   | 1.07(1.06, 1.09)                             | 1.08(1.07, 1.10)                     | 1.10(1.07, 1.14)                                        |
| Upper-middle income   | 1.06(1.04, 1.08)                          | 1.20(1.16, 1.23)                                   | 1.02(1.00, 1.03)                             | 1.01(1.00, 1.02)                     | 1.09(1.07, 1.11)                                        |
| SSA category          |                                           |                                                    |                                              |                                      |                                                         |
| Non-SSA               | 1.09(1.06, 1.13)                          | 1.11(1.09, 1.13)                                   | 1.04(1.01, 1.06)                             | 1.04(1.01, 1.07)                     | 1.10(1.04, 1.15)                                        |
| SSA                   | 1.21(1.19, 1.23)                          | 1.12(1.09, 1.16)                                   | 1.12(1.10, 1.14)                             | 1.11(1.08, 1.14)                     | 1.15(1.12, 1.19)                                        |
| Countdown category    |                                           |                                                    |                                              |                                      |                                                         |
| Non-countdown         | 1.08(1.05, 1.12)                          | 1.14(1.11, 1.16)                                   | 1.05(1.02, 1.08)                             | 1.06(1.03, 1.08)                     | 1.09(1.04, 1.15)                                        |
| Countdown             | 1.17(1.14, 1.19)                          | 1.12(1.09, 1.15)                                   | 1.07(1.05, 1.08)                             | 1.08(1.06, 1.09)                     | 1.11(1.08, 1.15)                                        |

**Note:**

1. “Relative inequality” is the ratio of reproductive service coverages between adult mothers aged 20-34 years old and adolescents 15-19 years old.
2. “SSA” represents “Sub-Saharan African countries”

**Appendix Table 4. Percentage of having four or more antenatal care visits among adolescents 15-19 years old and adult mothers 20-34 years old<sup>1</sup>**

| Country     | Year | WHO region            | Income classification <sup>2</sup> | Countdown | SSA <sup>3</sup> | 15-34 (%)       | 15-19 (%)       | 20-34 (%)       | Absolute inequality between 20-34 and 15-19 (percentage points) |
|-------------|------|-----------------------|------------------------------------|-----------|------------------|-----------------|-----------------|-----------------|-----------------------------------------------------------------|
| Afghanistan | 2015 | Eastern Mediterranean | L                                  | Yes       | 0                | 17.8[17.3,18.3] | 14.6[13.2,16.0] | 18.6[18.0,19.2] | 4.0[3.2,4.8]                                                    |
| Afghanistan | 2010 | Eastern Mediterranean | L                                  | Yes       | 0                | 14.6[13.0,16.2] | 11.5[7.9,15.1]  | 14.8[12.9,16.7] | 3.3[1.0,5.6]                                                    |
| Albania     | 2017 | Europe                | UM                                 | No        | 0                | 77.8[77.2,78.4] | 77.9[75.0,80.8] | 73.8[73.2,74.4] | -4.1[-5.6,-2.6]                                                 |
| Albania     | 2008 | Europe                | LM                                 | No        | 0                | 66.8[64.4,69.2] | 61.1[52.9,69.3] | 68.9[66.2,71.6] | 7.8[4.9,10.7]                                                   |
| Algeria     | 2012 | Africa                | UM                                 | Yes       | 0                | 70.0[69.3,70.7] | 73.3[70.2,76.4] | 68.4[67.6,69.2] | -4.9[-6.3,-3.5]                                                 |
| Angola      | 2015 | Africa                | UM                                 | Yes       | 1                | 61.4[60.4,62.4] | 54.1[51.9,56.3] | 62.7[61.4,64.0] | 8.6[7.0,10.2]                                                   |
| Argentina   | 2011 | Americas              | UM                                 | No        | 0                | 89.8[88.5,91.1] | 84.1[79.9,88.3] | 90.5[89.0,92.0] | 6.4[4.4,8.4]                                                    |
| Armenia     | 2015 | Europe                | LM                                 | No        | 0                | 96.0[95.1,96.9] | 95.2[92.1,98.3] | 97.3[96.4,98.2] | 2.1[0.8,3.4]                                                    |
| Armenia     | 2010 | Europe                | LM                                 | No        | 0                | 92.8[91.5,94.1] | 89.2[85.8,92.6] | 93.0[91.6,94.4] | 3.8[2.1,5.5]                                                    |
| Armenia     | 2005 | Europe                | LM                                 | No        | 0                | 70.9[68.3,73.5] | 65.5[57.6,73.4] | 71.4[68.4,74.4] | 5.9[2.3,9.5]                                                    |
| Armenia     | 2000 | Europe                | L                                  | No        | 0                | 64.7[62.1,67.3] | 55.7[49.2,62.2] | 66.4[63.4,69.4] | 10.7[7.2,14.2]                                                  |
| Azerbaijan  | 2006 | Europe                | LM                                 | Yes       | 0                | 45.2[42.8,47.6] | 38.2[31.3,45.1] | 46.9[44.2,49.6] | 8.7[5.5,11.9]                                                   |
| Bangladesh  | 2014 | South-East Asia       | LM                                 | Yes       | 0                | 31.2[29.8,32.6] | 29.2[26.9,31.5] | 32.8[31.1,34.5] | 3.6[1.7,5.5]                                                    |
| Bangladesh  | 2011 | South-East Asia       | L                                  | Yes       | 0                | 26.8[25.8,27.7] | 26.5[24.7,28.3] | 26.9[25.6,28.2] | 0.4[-1.0,1.8]                                                   |
| Bangladesh  | 2007 | South-East Asia       | L                                  | Yes       | 0                | 23.3[22.2,24.5] | 21.4[19.4,23.4] | 24.3[22.8,25.8] | 2.9[1.2,4.6]                                                    |
| Bangladesh  | 2004 | South-East Asia       | L                                  | Yes       | 0                | 18.6[17.7,19.6] | 16.1[14.4,17.8] | 19.9[18.5,21.3] | 3.8[2.3,5.3]                                                    |
| Belize      | 2015 | Americas              | UM                                 | No        | 0                | 92.6[91.5,93.7] | 90.6[87.2,94.0] | 93.0[91.7,94.3] | 2.4[0.8,4.0]                                                    |
| Belize      | 2011 | Americas              | LM                                 | No        | 0                | 83.1[81.6,84.6] | 79.5[76.6,82.4] | 84.6[82.8,86.4] | 5.1[3.0,7.2]                                                    |
| Benin       | 2018 | Africa                | L                                  | Yes       | 1                | 49.0[47.5,50.5] | 47.2[43.7,50.7] | 50.3[48.5,52.1] | 3.1[0.9,5.3]                                                    |
| Benin       | 2014 | Africa                | L                                  | Yes       | 1                | 58.7[57.1,60.3] | 51.8[48.0,55.6] | 60.1[58.1,62.1] | 8.3[5.8,10.8]                                                   |
| Benin       | 2011 | Africa                | L                                  | Yes       | 1                | 58.2[57.2,59.2] | 56.1[53.2,59.0] | 59.3[58.1,60.5] | 3.2[1.6,4.8]                                                    |
| Benin       | 2006 | Africa                | L                                  | Yes       | 1                | 60.5[59.6,61.4] | 56.4[53.7,59.1] | 61.9[60.8,63.0] | 5.5[4.1,6.9]                                                    |
| Benin       | 2001 | Africa                | L                                  | Yes       | 1                | 61.6[60.0,63.2] | 58.7[54.5,62.9] | 64.4[62.5,66.3] | 5.7[3.2,8.2]                                                    |

**Note:**

1. We mark the countries with absolute inequality (difference) between mothers 20-34 and 15-19 years old larger than 5 percentage points in orange.
2. Income classification: "L" represents "low-income country"; "LM" represents "lower-middle-income country"; "UM" represents "upper-middle-income country".
3. SSA: "1" represents "Sub-Saharan African country"; "0" represents "Not a Sub-Saharan African country".

**Appendix Table 4. Percentage of having four or more antenatal care visits among adolescents 15-19 years old and adult mothers 20-34 years old<sup>1</sup> (continued)**

| Country                  | Year | WHO region      | Income classification <sup>2</sup> | Countdown | SSA <sup>3</sup> | 15-34 (%)       | 15-19 (%)       | 20-34 (%)       | Absolute inequality between 20-34 and 15-19 (percentage points) |
|--------------------------|------|-----------------|------------------------------------|-----------|------------------|-----------------|-----------------|-----------------|-----------------------------------------------------------------|
| Bhutan                   | 2010 | South-East Asia | LM                                 | Yes       | 0                | 77.3[76.7,77.9] | 72.8[70.5,75.1] | 79.1[78.4,79.8] | 6.3[5.3,7.3]                                                    |
| Bolivia                  | 2008 | Americas        | LM                                 | Yes       | 0                | 72.1[71.0,73.2] | 70.8[68.3,73.3] | 76.2[74.9,77.5] | 5.4[3.8,7.0]                                                    |
| Bolivia                  | 2003 | Americas        | LM                                 | Yes       | 0                | 61.9[60.8,63.1] | 60.0[57.3,62.7] | 62.9[61.5,64.3] | 2.9[1.3,4.5]                                                    |
| Burkina Faso             | 2010 | Africa          | L                                  | Yes       | 1                | 33.7[32.8,34.6] | 31.8[29.5,34.1] | 34.4[33.3,35.5] | 2.6[1.2,4.0]                                                    |
| Burkina Faso             | 2003 | Africa          | L                                  | Yes       | 1                | 19.6[18.7,20.4] | 19.1[16.8,21.4] | 19.8[18.7,20.9] | 0.7[-0.7,2.1]                                                   |
| Burundi                  | 2016 | Africa          | L                                  | Yes       | 1                | 49.3[48.2,50.4] | 48.7[45.3,52.1] | 49.7[48.4,51.0] | 1.0[-0.7,2.7]                                                   |
| Burundi                  | 2010 | Africa          | L                                  | Yes       | 1                | 33.4[32.1,34.7] | 31.4[27.3,35.5] | 34.3[32.7,35.9] | 2.9[0.8,5.0]                                                    |
| Cambodia                 | 2014 | Western Pacific | L                                  | Yes       | 0                | 75.6[74.5,76.7] | 68.5[65.2,71.8] | 76.7[75.5,77.9] | 8.2[6.6,9.8]                                                    |
| Cambodia                 | 2010 | Western Pacific | L                                  | Yes       | 0                | 59.4[58.2,60.6] | 55.9[52.2,59.6] | 60.3[58.9,61.7] | 4.4[2.7,6.1]                                                    |
| Cambodia                 | 2005 | Western Pacific | L                                  | Yes       | 0                | 27.0[25.9,28.1] | 26.3[23.1,29.5] | 27.9[26.6,29.2] | 1.6[-0.1,3.3]                                                   |
| Cambodia                 | 2000 | Western Pacific | L                                  | Yes       | 0                | 8.4[7.7,9.2]    | 8.1[5.8,10.4]   | 8.6[7.8,9.4]    | 0.5[-0.6,1.6]                                                   |
| Cameroon                 | 2014 | Africa          | LM                                 | Yes       | 1                | 58.8[57.9,59.7] | 50.5[48.2,52.8] | 60.7[59.6,61.8] | 10.2[8.7,11.7]                                                  |
| Cameroon                 | 2011 | Africa          | LM                                 | Yes       | 1                | 62.2[61.1,63.3] | 56.9[54.5,59.3] | 65.5[64.2,66.8] | 8.6[7.0,10.2]                                                   |
| Cameroon                 | 2004 | Africa          | L                                  | Yes       | 1                | 60.4[59.1,61.7] | 56.4[53.7,59.1] | 62.1[60.5,63.7] | 5.7[3.7,7.7]                                                    |
| Central African Republic | 2010 | Africa          | L                                  | Yes       | 1                | 38.1[36.8,39.4] | 36.6[33.7,39.5] | 38.7[37.1,40.3] | 2.1[0.2,4.0]                                                    |
| Chad                     | 2014 | Africa          | L                                  | Yes       | 1                | 28.6[27.8,29.5] | 28.9[27.0,30.8] | 28.5[27.5,29.5] | -0.4[-1.7,0.9]                                                  |
| Chad                     | 2010 | Africa          | L                                  | Yes       | 1                | 23.1[20.5,25.7] | 22.6[15.7,29.5] | 23.3[20.3,26.3] | 0.7[-2.7,4.1]                                                   |
| Chad                     | 2004 | Africa          | L                                  | Yes       | 1                | 19.7[18.4,20.9] | 19.0[15.9,22.1] | 20.0[18.2,21.8] | 1.0[-1.2,3.2]                                                   |
| Colombia                 | 2005 | Americas        | LM                                 | No        | 0                | 81.3[80.6,82.0] | 75.4[73.8,77.0] | 83.2[82.4,84.0] | 7.8[6.8,8.8]                                                    |
| Colombia                 | 2000 | Americas        | LM                                 | No        | 0                | 80.6[79.3,81.9] | 72.8[69.7,75.9] | 82.8[81.3,84.3] | 10.0[8.1,11.9]                                                  |
| Comoros                  | 2012 | Africa          | L                                  | Yes       | 1                | 48.9[46.6,51.2] | 42.7[36.4,49.0] | 61.9[59.1,64.7] | 19.2[15.6,22.8]                                                 |
| Congo                    | 2014 | Africa          | LM                                 | Yes       | 1                | 79.0[77.6,80.4] | 75.4[71.7,79.1] | 82.3[80.5,84.1] | 6.9[4.6,9.2]                                                    |
| Congo                    | 2011 | Africa          | LM                                 | Yes       | 1                | 74.0[73.0,75.0] | 71.5[69.1,73.9] | 75.2[73.9,76.5] | 3.7[2.1,5.3]                                                    |
| Congo                    | 2005 | Africa          | LM                                 | Yes       | 1                | 74.7[73.3,76.1] | 73.4[70.3,76.5] | 78.4[76.7,80.1] | 5.0[2.9,7.1]                                                    |



**Appendix Table 4. Percentage of having four or more antenatal care visits among adolescents 15-19 years old and adult mothers 20-34 years old<sup>1</sup> (continued)**

| Country                          | Year | WHO region            | Income classification <sup>2</sup> | Countdown | SSA <sup>3</sup> | 15-34 (%)        | 15-19 (%)        | 20-34 (%)        | Absolute inequality between 20-34 and 15-19 (percentage points) |
|----------------------------------|------|-----------------------|------------------------------------|-----------|------------------|------------------|------------------|------------------|-----------------------------------------------------------------|
| Costa Rica                       | 2011 | Americas              | UM                                 | No        | 0                | 90.2[89.1,91.3]  | 85.7[83.0,88.4]  | 90.6[89.3,91.9]  | 4.9[3.3,6.5]                                                    |
| Cuba                             | 2014 | Americas              | UM                                 | No        | 0                | 97.8[96.5,99.1]  | 98.2[94.0,100.0] | 97.4[96.0,98.8]  | -0.8[-2.7,1.1]                                                  |
| Côte d'Ivoire                    | 2016 | Africa                | LM                                 | Yes       | 1                | 51.3[50.2,52.4]  | 45.2[42.3,48.1]  | 53.1[51.7,54.5]  | 7.9[6.1,9.7]                                                    |
| Côte d'Ivoire                    | 2011 | Africa                | LM                                 | Yes       | 1                | 44.2[42.9,45.5]  | 41.2[38.1,44.3]  | 45.1[43.5,46.7]  | 3.9[1.9,5.9]                                                    |
| Democratic Republic of the Congo | 2013 | Africa                | L                                  | Yes       | 1                | 48.0[47.1,48.9]  | 46.4[44.3,48.5]  | 48.3[47.1,49.5]  | 1.9[0.5,3.3]                                                    |
| Democratic Republic of the Congo | 2010 | Africa                | L                                  | Yes       | 1                | 43.8[43.0,44.6]  | 41.5[39.4,43.6]  | 44.6[43.5,45.7]  | 3.1[1.8,4.4]                                                    |
| Democratic Republic of the Congo | 2007 | Africa                | L                                  | Yes       | 1                | 46.8[45.5,48.1]  | 46.8[43.5,50.1]  | 46.8[45.1,48.5]  | 0.0[-2.1,2.1]                                                   |
| Dominican Republic               | 2014 | Americas              | UM                                 | Yes       | 0                | 92.9[92.2,93.6]  | 89.7[88.2,91.2]  | 93.5[92.7,94.3]  | 3.8[2.8,4.8]                                                    |
| Dominican Republic               | 2013 | Americas              | UM                                 | Yes       | 0                | 95.4[94.8,96.0]  | 94.2[92.9,95.5]  | 95.6[94.8,96.4]  | 1.4[0.5,2.3]                                                    |
| Dominican Republic               | 2007 | Americas              | LM                                 | Yes       | 0                | 94.5[94.1,94.9]  | 93.6[92.7,94.5]  | 95.8[95.3,96.3]  | 2.2[1.6,2.8]                                                    |
| Dominican Republic               | 2002 | Americas              | LM                                 | Yes       | 0                | 94.1[93.6,94.5]  | 92.2[91.1,93.3]  | 95.0[94.4,95.6]  | 2.8[2.1,3.5]                                                    |
| Egypt                            | 2014 | Eastern Mediterranean | LM                                 | No        | 0                | 84.0[83.3,84.7]  | 83.7[81.4,86.0]  | 84.0[83.3,84.7]  | 0.3[-0.6,1.2]                                                   |
| Egypt                            | 2008 | Eastern Mediterranean | LM                                 | No        | 0                | 66.5[65.5,67.5]  | 66.1[63.0,69.2]  | 66.7[65.5,67.9]  | 0.6[-0.8,2.0]                                                   |
| Egypt                            | 2005 | Eastern Mediterranean | LM                                 | No        | 0                | 58.5[57.5,59.5]  | 57.5[54.6,60.4]  | 60.2[59.1,61.3]  | 2.7[1.3,4.1]                                                    |
| Egypt                            | 2000 | Eastern Mediterranean | LM                                 | No        | 0                | 36.7[35.6,37.8]  | 36.3[33.0,39.6]  | 42.6[41.3,43.9]  | 6.3[4.7,7.9]                                                    |
| El Salvador                      | 2014 | Americas              | LM                                 | No        | 0                | 90.1[89.0,91.2]  | 89.4[86.0,92.8]  | 91.0[89.7,92.3]  | 1.6[-0.1,3.3]                                                   |
| Ethiopia                         | 2016 | Africa                | L                                  | Yes       | 1                | 62.7[61.6,63.8]  | 56.3[53.4,59.2]  | 63.3[62.0,64.6]  | 7.0[5.3,8.7]                                                    |
| Ethiopia                         | 2011 | Africa                | L                                  | Yes       | 1                | 19.1[18.2,20.0]  | 18.9[16.6,21.2]  | 23.5[22.4,24.6]  | 4.6[3.2,6.0]                                                    |
| Ethiopia                         | 2005 | Africa                | L                                  | Yes       | 1                | 12.2[11.4,13.0]  | 11.5[9.2,13.8]   | 12.6[11.5,13.7]  | 1.1[-0.3,2.5]                                                   |
| Ethiopia                         | 2000 | Africa                | L                                  | Yes       | 1                | 10.4[9.7,11.1]   | 9.4[7.2,11.6]    | 10.5[9.5,11.5]   | 1.1[-0.2,2.4]                                                   |
| Gabon                            | 2012 | Africa                | UM                                 | Yes       | 1                | 77.6[76.4,78.8]  | 74.7[71.8,77.6]  | 78.6[76.8,80.4]  | 3.9[1.7,6.1]                                                    |
| Gabon                            | 2000 | Africa                | UM                                 | Yes       | 1                | 63.3[61.6,65.0]  | 59.5[56.2,62.8]  | 64.6[62.3,66.9]  | 5.1[2.4,7.8]                                                    |
| Gambia                           | 2018 | Africa                | L                                  | Yes       | 1                | 99.0[97.7,100.0] | 97.1[94.2,100.0] | 99.0[97.4,100.0] | 1.9[-0.2,4.0]                                                   |
| Gambia                           | 2013 | Africa                | L                                  | Yes       | 1                | 77.6[76.5,78.7]  | 72.0[69.0,75.0]  | 78.8[77.5,80.1]  | 6.8[5.0,8.6]                                                    |
| Gambia                           | 2010 | Africa                | L                                  | Yes       | 1                | 1.9[0.4,3.4]     | 0.7[0.0,4.9]     | 2.0[0.2,3.8]     | 1.3[-1.0,3.6]                                                   |

**Appendix Table 4. Percentage of having four or more antenatal care visits among adolescents 15-19 years old and adult mothers 20-34 years old<sup>1</sup> (continued)**

| Country       | Year | WHO region      | Income classification <sup>2</sup> | Countdown | SSA <sup>3</sup> | 15-34 (%)       | 15-19 (%)       | 20-34 (%)       | Absolute inequality between 20-34 and 15-19 (percentage points) |
|---------------|------|-----------------|------------------------------------|-----------|------------------|-----------------|-----------------|-----------------|-----------------------------------------------------------------|
| Ghana         | 2014 | Africa          | LM                                 | Yes       | 1                | 87.3[86.3,88.3] | 80.7[77.2,84.2] | 88.0[86.8,89.2] | 7.3[5.6,9.0]                                                    |
| Ghana         | 2011 | Africa          | LM                                 | Yes       | 1                | 86.6[85.0,88.2] | 79.9[76.2,83.6] | 88.0[86.1,89.9] | 8.1[5.7,10.5]                                                   |
| Ghana         | 2008 | Africa          | L                                  | Yes       | 1                | 78.2[76.5,79.9] | 70.0[64.4,75.6] | 80.8[78.8,82.8] | 10.8[7.9,13.7]                                                  |
| Ghana         | 2003 | Africa          | L                                  | Yes       | 1                | 69.4[67.7,71.1] | 68.1[63.2,73.0] | 70.2[68.1,72.3] | 2.1[-0.6,4.8]                                                   |
| Guatemala     | 2014 | Americas        | LM                                 | Yes       | 0                | 86.2[85.5,86.9] | 84.0[82.5,85.5] | 87.3[86.5,88.1] | 3.3[2.3,4.3]                                                    |
| Guinea        | 2018 | Africa          | L                                  | Yes       | 1                | 35.3[33.6,37.0] | 33.9[29.0,38.8] | 35.7[33.6,37.8] | 1.8[-1.1,4.7]                                                   |
| Guinea        | 2016 | Africa          | L                                  | Yes       | 1                | 50.6[49.5,51.7] | 43.2[39.8,46.6] | 52.3[51.0,53.6] | 9.1[7.4,10.8]                                                   |
| Guinea        | 2012 | Africa          | L                                  | Yes       | 1                | 56.6[55.2,58.0] | 55.9[53.0,58.8] | 57.9[56.2,59.6] | 2.0[-0.1,4.1]                                                   |
| Guinea        | 2005 | Africa          | L                                  | Yes       | 1                | 52.5[51.0,54.0] | 52.8[49.3,56.3] | 52.3[50.4,54.2] | -0.5[-2.8,1.8]                                                  |
| Guinea-Bissau | 2014 | Africa          | L                                  | Yes       | 1                | 64.9[63.5,66.3] | 63.5[60.0,67.0] | 65.4[63.7,67.1] | 1.9[-0.4,4.2]                                                   |
| Guinea-Bissau | 2010 | Africa          | L                                  | Yes       | 1                | 67.6[66.3,68.9] | 64.6[60.5,68.7] | 68.8[67.2,70.4] | 4.2[2.2,6.2]                                                    |
| Guyana        | 2014 | Americas        | LM                                 | Yes       | 0                | 86.7[86.0,87.4] | 84.8[83.4,86.2] | 87.8[87.0,88.6] | 3.0[2.0,4.0]                                                    |
| Guyana        | 2009 | Americas        | LM                                 | Yes       | 0                | 78.5[77.0,80.0] | 76.1[72.5,79.7] | 81.2[79.3,83.1] | 5.1[2.8,7.4]                                                    |
| Haiti         | 2016 | Americas        | L                                  | Yes       | 0                | 66.7[65.3,68.1] | 59.6[55.9,63.3] | 68.5[67.0,70.0] | 8.9[7.1,10.7]                                                   |
| Haiti         | 2012 | Americas        | L                                  | Yes       | 0                | 67.3[66.1,68.5] | 62.8[59.6,66.0] | 72.1[70.6,73.6] | 9.3[7.4,11.2]                                                   |
| Haiti         | 2006 | Americas        | L                                  | Yes       | 0                | 53.8[53.6,54.0] | 46.8[46.2,47.4] | 57.9[57.3,58.5] | 11.1[10.5,11.7]                                                 |
| Haiti         | 2000 | Americas        | L                                  | Yes       | 0                | 44.2[42.7,45.7] | 40.2[36.4,44.0] | 47.0[45.1,48.9] | 6.8[4.5,9.1]                                                    |
| Honduras      | 2011 | Americas        | LM                                 | Yes       | 0                | 88.9[88.2,89.6] | 86.5[85.1,87.9] | 90.0[89.2,90.8] | 3.5[2.5,4.5]                                                    |
| Honduras      | 2006 | Americas        | LM                                 | Yes       | 0                | 80.8[80.3,81.3] | 77.8[76.2,79.4] | 82.4[81.7,83.1] | 4.6[3.7,5.5]                                                    |
| India         | 2015 | South-East Asia | LM                                 | Yes       | 0                | 48.7[48.5,48.9] | 45.0[44.4,45.6] | 50.1[49.9,50.3] | 5.1[4.8,5.4]                                                    |
| India         | 2006 | South-East Asia | L                                  | Yes       | 0                | 45.3[44.1,46.4] | 40.2[37.7,42.7] | 47.8[46.3,49.3] | 7.6[5.8,9.4]                                                    |
| Indonesia     | 2012 | South-East Asia | LM                                 | Yes       | 0                | 87.8[87.3,88.3] | 78.9[77.0,80.8] | 89.0[88.4,89.6] | 10.1[9.2,11.0]                                                  |
| Indonesia     | 2007 | South-East Asia | LM                                 | Yes       | 0                | 81.5[80.9,82.1] | 73.5[71.4,75.6] | 82.6[81.9,83.3] | 9.1[8.1,10.1]                                                   |
| Indonesia     | 2002 | South-East Asia | L                                  | Yes       | 0                | 81.0[80.3,81.7] | 75.1[73.2,77.0] | 82.7[81.9,83.5] | 7.6[6.6,8.6]                                                    |

**Appendix Table 4. Percentage of having four or more antenatal care visits among adolescents 15-19 years old and adult mothers 20-34 years old<sup>1</sup> (continued)**

| Country                          | Year | WHO region            | Income classification <sup>2</sup> | Countdown | SSA <sup>3</sup> | 15-34 (%)       | 15-19 (%)        | 20-34 (%)       | Absolute inequality between 20-34 and 15-19 (percentage points) |
|----------------------------------|------|-----------------------|------------------------------------|-----------|------------------|-----------------|------------------|-----------------|-----------------------------------------------------------------|
| Iraq                             | 2018 | Eastern Mediterranean | UM                                 | Yes       | 0                | 67.9[67.2,68.6] | 75.4[73.5,77.3]  | 67.2[66.5,67.9] | -8.2[-9.2,-7.2]                                                 |
| Iraq                             | 2011 | Eastern Mediterranean | LM                                 | Yes       | 0                | 50.6[49.2,52.0] | 52.4[48.3,56.5]  | 49.7[48.1,51.3] | -2.7[-4.9,-0.5]                                                 |
| Jordan                           | 2018 | Eastern Mediterranean | LM                                 | No        | 0                | 92.1[90.8,93.4] | 92.5[88.8,96.2]  | 91.8[90.4,93.2] | -0.7[-2.6,1.2]                                                  |
| Jordan                           | 2012 | Eastern Mediterranean | UM                                 | No        | 0                | 94.5[94.0,95.0] | 92.1[89.9,94.3]  | 94.7[94.1,95.3] | 2.6[1.9,3.3]                                                    |
| Jordan                           | 2007 | Eastern Mediterranean | LM                                 | No        | 0                | 94.7[94.2,95.3] | 95.4[93.2,97.6]  | 94.4[93.7,95.1] | -1.0[-1.8,-0.2]                                                 |
| Jordan                           | 2002 | Eastern Mediterranean | LM                                 | No        | 0                | 90.9[90.0,91.8] | 90.9[87.3,94.5]  | 90.2[89.1,91.3] | -0.7[-2.1,0.7]                                                  |
| Kazakhstan                       | 2015 | Europe                | UM                                 | No        | 0                | 95.3[94.0,96.6] | 97.1[93.5,100.0] | 95.1[93.6,96.6] | -2.0[-4.1, 0.1]                                                 |
| Kazakhstan                       | 2010 | Europe                | UM                                 | No        | 0                | 87.0[85.9,88.1] | 73.9[70.8,77.0]  | 87.5[86.1,88.9] | 13.6[11.9,15.3]                                                 |
| Kenya                            | 2014 | Africa                | LM                                 | Yes       | 1                | 57.6[56.8,58.4] | 51.1[49.0,53.2]  | 58.8[57.9,59.7] | 7.7[6.5,8.9]                                                    |
| Kenya                            | 2008 | Africa                | L                                  | Yes       | 1                | 47.1[45.6,48.6] | 37.5[33.9,41.1]  | 50.0[48.1,51.9] | 12.5[10.2,14.8]                                                 |
| Kenya                            | 2003 | Africa                | L                                  | Yes       | 1                | 52.3[50.7,53.9] | 47.1[43.5,50.7]  | 56.1[54.2,58.0] | 9.0[6.7,11.3]                                                   |
| Kyrgyzstan                       | 2018 | Europe                | LM                                 | Yes       | 0                | 94.3[93.7,94.9] | 80.7[78.8,82.6]  | 95.6[94.9,96.3] | 14.9[13.9,15.9]                                                 |
| Kyrgyzstan                       | 2014 | Europe                | LM                                 | Yes       | 0                | 94.6[93.2,96.0] | 92.5[88.7,96.3]  | 95.0[93.4,96.6] | 2.5[0.2,4.8]                                                    |
| Kyrgyzstan                       | 2012 | Europe                | L                                  | Yes       | 0                | 83.2[82.0,84.4] | 82.7[78.4,87.0]  | 83.4[82.0,84.8] | 0.7[-1.1,2.5]                                                   |
| Lao People's Democratic Republic | 2017 | Western Pacific       | LM                                 | Yes       | 0                | 62.2[59.6,64.8] | 51.2[43.3,59.1]  | 65.5[62.7,68.3] | 14.3[11.0,17.6]                                                 |
| Lao People's Democratic Republic | 2011 | Western Pacific       | LM                                 | Yes       | 0                | 36.9[35.7,38.1] | 25.8[22.1,29.5]  | 40.7[39.4,42.0] | 14.9[13.1,16.7]                                                 |
| Lebanon                          | 2011 | Eastern Mediterranean | UM                                 | No        | 0                | 89.7[89.2,90.2] | 83.6[81.4,85.8]  | 90.8[90.2,91.4] | 7.2[6.2,8.2]                                                    |
| Lesotho                          | 2018 | Africa                | LM                                 | Yes       | 1                | 76.6[74.9,78.3] | 70.1[66.7,73.5]  | 78.1[76.1,80.1] | 8.0[5.7,10.3]                                                   |
| Lesotho                          | 2014 | Africa                | LM                                 | Yes       | 1                | 74.4[72.7,76.1] | 71.7[68.1,75.3]  | 76.0[74.0,78.0] | 4.3[1.8,6.8]                                                    |
| Lesotho                          | 2009 | Africa                | LM                                 | Yes       | 1                | 70.4[68.8,72.0] | 65.7[62.3,69.1]  | 71.0[69.0,73.0] | 5.3[2.9,7.7]                                                    |
| Lesotho                          | 2004 | Africa                | L                                  | Yes       | 1                | 69.6[68.0,71.2] | 69.2[65.6,72.8]  | 73.2[71.1,75.3] | 4.0[1.5,6.5]                                                    |
| Liberia                          | 2013 | Africa                | L                                  | Yes       | 1                | 77.1[76.1,78.2] | 77.0[74.6,79.4]  | 77.2[75.7,78.7] | 0.2[-1.6,2.0]                                                   |
| Liberia                          | 2007 | Africa                | L                                  | Yes       | 1                | 66.0[64.6,67.4] | 63.6[60.2,67.0]  | 68.7[66.9,70.5] | 5.1[2.8,7.4]                                                    |

**Appendix Table 4. Percentage of having four or more antenatal care visits among adolescents 15-19 years old and adult mothers 20-34 years old<sup>1</sup> (continued)**

| Country    | Year | WHO region      | Income classification <sup>2</sup> | Countdown | SSA <sup>3</sup> | 15-34 (%)       | 15-19 (%)       | 20-34 (%)       | Absolute inequality between 20-34 and 15-19 (percentage points) |
|------------|------|-----------------|------------------------------------|-----------|------------------|-----------------|-----------------|-----------------|-----------------------------------------------------------------|
| Madagascar | 2008 | Africa          | L                                  | Yes       | 1                | 49.3[48.2,50.4] | 46.7[44.5,48.9] | 51.1[49.7,52.5] | 4.4[2.8,6.0]                                                    |
| Madagascar | 2003 | Africa          | L                                  | Yes       | 1                | 39.9[38.3,41.5] | 34.3[30.6,38.0] | 41.8[39.8,43.8] | 7.5[5.0,10.0]                                                   |
| Malawi     | 2015 | Africa          | L                                  | Yes       | 1                | 50.6[49.8,51.4] | 45.4[43.6,47.2] | 52.5[51.5,53.5] | 7.1[5.9,8.3]                                                    |
| Malawi     | 2013 | Africa          | L                                  | Yes       | 1                | 44.7[43.6,45.8] | 42.1[39.5,44.7] | 45.3[43.9,46.7] | 3.2[1.5,4.9]                                                    |
| Malawi     | 2010 | Africa          | L                                  | Yes       | 1                | 43.9[43.1,44.7] | 42.7[40.8,44.6] | 44.5[43.5,45.5] | 1.8[0.6,3.0]                                                    |
| Malawi     | 2004 | Africa          | L                                  | Yes       | 1                | 57.1[56.0,58.2] | 56.8[54.3,59.3] | 57.6[56.2,59.0] | 0.8[-0.9,2.5]                                                   |
| Malawi     | 2000 | Africa          | L                                  | Yes       | 1                | 56.8[55.7,57.9] | 56.3[54.0,58.6] | 57.1[55.7,58.5] | 0.8[-0.9,2.5]                                                   |
| Maldives   | 2017 | South-East Asia | UM                                 | No        | 0                | 81.6[81.1,82.1] | 80.0[77.7,82.3] | 81.9[81.3,82.5] | 1.9[1.0,2.8]                                                    |
| Maldives   | 2009 | South-East Asia | LM                                 | No        | 0                | 85.1[84.5,85.7] | 85.1[82.2,88.0] | 87.6[87.0,88.2] | 2.5[1.5,3.5]                                                    |
| Mali       | 2018 | Africa          | L                                  | Yes       | 1                | 43.4[42.1,44.7] | 42.0[39.3,44.7] | 44.5[42.9,46.1] | 2.5[0.7,4.3]                                                    |
| Mali       | 2015 | Africa          | L                                  | Yes       | 1                | 38.0[37.2,38.8] | 36.3[34.2,38.4] | 39.3[38.2,40.4] | 3.0[1.6,4.4]                                                    |
| Mali       | 2012 | Africa          | L                                  | Yes       | 1                | 41.2[40.0,42.4] | 41.0[38.3,43.7] | 43.5[42.0,45.0] | 2.5[0.7,4.3]                                                    |
| Mali       | 2009 | Africa          | L                                  | Yes       | 1                | 34.9[33.9,35.9] | 31.9[29.5,34.3] | 36.3[35.0,37.6] | 4.4[2.7,6.1]                                                    |
| Mali       | 2006 | Africa          | L                                  | Yes       | 1                | 35.4[34.4,36.4] | 33.0[30.9,35.1] | 36.1[34.8,37.4] | 3.1[1.6,4.6]                                                    |
| Mali       | 2001 | Africa          | L                                  | Yes       | 1                | 29.9[28.9,30.9] | 28.1[25.9,30.3] | 30.5[29.2,31.8] | 2.4[0.8,4.0]                                                    |
| Mauritania | 2015 | Africa          | LM                                 | Yes       | 1                | 63.0[61.3,64.7] | 55.0[49.4,60.6] | 65.4[63.4,67.4] | 10.4[8.0,12.8]                                                  |
| Mauritania | 2011 | Africa          | L                                  | Yes       | 1                | 49.6[48.7,50.5] | 50.0[46.7,53.3] | 49.4[48.3,50.5] | -0.6[-2.3,1.1]                                                  |
| Mexico     | 2015 | Americas        | UM                                 | No        | 0                | 94.3[93.6,95.0] | 92.0[89.9,94.1] | 94.8[94.0,95.6] | 2.8[1.7,3.9]                                                    |
| Moldova    | 2012 | Europe          | LM                                 | No        | 0                | 95.4[94.2,96.6] | 94.8[91.7,97.9] | 95.6[94.1,97.1] | 0.8[-1.0,2.6]                                                   |
| Moldova    | 2005 | Europe          | LM                                 | No        | 0                | 88.8[87.4,90.2] | 86.6[82.8,90.4] | 89.2[87.7,90.7] | 2.6[0.7,4.5]                                                    |
| Mongolia   | 2018 | Western Pacific | LM                                 | No        | 0                | 88.4[87.1,89.7] | 89.0[85.4,92.6] | 88.1[86.5,89.7] | -0.9[-2.8,1.0]                                                  |
| Mongolia   | 2013 | Western Pacific | LM                                 | No        | 0                | 86.2[85.1,87.4] | 79.9[76.8,83.0] | 89.4[87.9,90.9] | 9.5[7.5,11.5]                                                   |
| Mongolia   | 2010 | Western Pacific | LM                                 | No        | 0                | 81.4[80.4,82.4] | 88.3[85.4,91.2] | 81.3[80.2,82.4] | -7.0[-8.5,-5.5]                                                 |
| Montenegro | 2018 | Europe          | UM                                 | No        | 0                | 93.1[92.7,93.5] | 91.9[90.6,93.2] | 93.7[93.1,94.3] | 1.8[0.9,2.7]                                                    |

**Appendix Table 4. Percentage of having four or more antenatal care visits among adolescents 15-19 years old and adult mothers 20-34 years old<sup>1</sup> (continued)**

| Country    | Year | WHO region            | Income classification <sup>2</sup> | Countdown | SSA <sup>3</sup> | 15-34 (%)       | 15-19 (%)       | 20-34 (%)       | Absolute inequality between 20-34 and 15-19 (percentage points) |
|------------|------|-----------------------|------------------------------------|-----------|------------------|-----------------|-----------------|-----------------|-----------------------------------------------------------------|
| Morocco    | 2003 | Eastern Mediterranean | LM                                 | Yes       | 0                | 30.5[29.2,31.8] | 28.9[24.7,33.1] | 31.5[30.0,33.0] | 2.6[0.7,4.5]                                                    |
| Mozambique | 2011 | Africa                | L                                  | Yes       | 1                | 56.6[55.4,57.7] | 50.7[48.3,53.1] | 59.5[58.1,60.9] | 8.8[7.1,10.5]                                                   |
| Mozambique | 2003 | Africa                | L                                  | Yes       | 1                | 53.1[51.9,54.3] | 51.9[49.2,54.6] | 53.1[51.6,54.6] | 1.2[-0.7,3.1]                                                   |
| Myanmar    | 2015 | South-East Asia       | LM                                 | Yes       | 0                | 58.6[57.0,60.2] | 49.6[44.1,55.1] | 60.2[58.4,62.0] | 10.6[8.3,12.9]                                                  |
| Namibia    | 2013 | Africa                | UM                                 | Yes       | 1                | 62.5[61.1,63.9] | 53.4[49.9,56.9] | 63.5[61.9,65.1] | 10.1[8.0,12.2]                                                  |
| Namibia    | 2006 | Africa                | LM                                 | Yes       | 1                | 70.4[69.1,71.7] | 64.9[61.5,68.3] | 73.7[72.1,75.3] | 8.8[6.7,10.9]                                                   |
| Namibia    | 2000 | Africa                | LM                                 | Yes       | 1                | 69.1[67.5,70.7] | 66.4[62.4,70.4] | 71.5[69.5,73.5] | 5.1[2.5,7.7]                                                    |
| Nepal      | 2016 | South-East Asia       | L                                  | Yes       | 0                | 70.7[69.2,72.1] | 71.2[68.3,74.1] | 70.4[68.7,72.1] | -0.8[-2.7,1.1]                                                  |
| Nepal      | 2014 | South-East Asia       | L                                  | Yes       | 0                | 59.5[58.4,60.6] | 50.8[47.9,53.7] | 62.6[61.3,63.9] | 11.8[10.0,13.6]                                                 |
| Nepal      | 2011 | South-East Asia       | L                                  | Yes       | 0                | 54.9[53.4,56.5] | 56.4[53.0,59.8] | 54.2[52.4,56.0] | -2.2[-4.3,-0.1]                                                 |
| Nepal      | 2006 | South-East Asia       | L                                  | Yes       | 0                | 29.4[28.0,30.8] | 36.5[33.3,39.7] | 28.8[27.2,30.4] | -7.7[-9.7,-5.7]                                                 |
| Nepal      | 2001 | South-East Asia       | L                                  | Yes       | 0                | 15.9[14.9,16.9] | 17.2[14.7,19.7] | 15.2[14.0,16.4] | -2.0[-3.5,-0.5]                                                 |
| Nicaragua  | 2001 | Americas              | L                                  | Yes       | 0                | 71.6[70.4,72.8] | 66.8[64.3,69.3] | 73.2[71.6,74.8] | 6.4[4.6,8.2]                                                    |
| Niger      | 2012 | Africa                | L                                  | Yes       | 1                | 32.8[31.7,33.9] | 30.3[27.8,32.8] | 33.9[32.6,35.2] | 3.6[2.0,5.2]                                                    |
| Niger      | 2006 | Africa                | L                                  | Yes       | 1                | 17.7[16.8,18.6] | 15.0[12.8,17.2] | 19.1[17.8,20.4] | 4.1[2.6,5.6]                                                    |
| Nigeria    | 2016 | Africa                | LM                                 | Yes       | 1                | 49.1[47.6,50.6] | 37.1[33.7,40.5] | 50.8[49.0,52.6] | 13.7[11.4,16.0]                                                 |
| Nigeria    | 2013 | Africa                | LM                                 | Yes       | 1                | 51.1[50.4,51.8] | 40.2[38.5,41.9] | 56.5[55.7,57.3] | 16.3[15.2,17.4]                                                 |
| Nigeria    | 2011 | Africa                | LM                                 | Yes       | 1                | 56.6[54.9,58.3] | 37.3[31.7,42.9] | 59.2[57.1,61.3] | 21.9[19.1,24.7]                                                 |
| Nigeria    | 2008 | Africa                | LM                                 | Yes       | 1                | 44.8[44.0,45.6] | 33.1[31.3,34.9] | 49.6[48.7,50.5] | 16.5[15.4,17.6]                                                 |
| Nigeria    | 2003 | Africa                | L                                  | Yes       | 1                | 47.4[45.8,49.0] | 38.5[34.8,42.2] | 53.3[51.3,55.3] | 14.8[12.4,17.2]                                                 |
| Pakistan   | 2018 | Eastern Mediterranean | LM                                 | Yes       | 0                | 51.4[50.4,52.4] | 46.2[43.4,49.0] | 53.9[52.7,55.1] | 7.7[6.1,9.3]                                                    |
| Pakistan   | 2012 | Eastern Mediterranean | LM                                 | Yes       | 0                | 36.6[35.5,37.7] | 33.1[29.7,36.5] | 40.5[39.2,41.8] | 7.4[5.8,9.0]                                                    |
| Pakistan   | 2006 | Eastern Mediterranean | L                                  | Yes       | 0                | 28.4[27.2,29.6] | 21.5[18.2,24.8] | 29.9[28.5,31.3] | 8.4[6.7,10.1]                                                   |
| Paraguay   | 2016 | Americas              | UM                                 | Yes       | 0                | 93.6[93.1,94.1] | 91.2[89.6,92.8] | 93.7[93.1,94.3] | 2.5[1.6,3.4]                                                    |

**Appendix Table 4. Percentage of having four or more antenatal care visits among adolescents 15-19 years old and adult mothers 20-34 years old<sup>1</sup> (continued)**

| Country               | Year | WHO region      | Income classification <sup>2</sup> | Countdown | SSA <sup>3</sup> | 15-34 (%)       | 15-19 (%)       | 20-34 (%)       | Absolute inequality between 20-34 and 15-19 (percentage points) |
|-----------------------|------|-----------------|------------------------------------|-----------|------------------|-----------------|-----------------|-----------------|-----------------------------------------------------------------|
| Peru                  | 2012 | Americas        | UM                                 | No        | 0                | 91.2[90.7,91.7] | 88.6[87.0,90.2] | 94.6[94.0,95.2] | 6.0[5.1,6.9]                                                    |
| Peru                  | 2011 | Americas        | UM                                 | No        | 0                | 89.8[89.3,90.3] | 87.8[86.2,89.4] | 91.6[90.9,92.3] | 3.8[2.9,4.7]                                                    |
| Peru                  | 2010 | Americas        | UM                                 | No        | 0                | 88.3[87.7,88.9] | 86.1[84.5,87.7] | 90.3[89.6,91.0] | 4.2[3.3,5.1]                                                    |
| Peru                  | 2009 | Americas        | UM                                 | No        | 0                | 92.5[91.9,93.1] | 88.8[87.2,90.4] | 93.1[92.4,93.8] | 4.3[3.4,5.2]                                                    |
| Peru                  | 2007 | Americas        | LM                                 | No        | 0                | 91.6[91.1,92.1] | 88.5[87.2,89.8] | 92.1[91.5,92.7] | 3.6[2.8,4.4]                                                    |
| Peru                  | 2004 | Americas        | LM                                 | No        | 0                | 87.4[86.9,87.9] | 86.5[85.2,87.8] | 90.1[89.5,90.7] | 3.6[2.8,4.4]                                                    |
| Peru                  | 2000 | Americas        | LM                                 | No        | 0                | 69.0[68.1,69.9] | 64.0[61.8,66.2] | 70.3[69.2,71.4] | 6.3[5.0,7.6]                                                    |
| Philippines           | 2017 | Western Pacific | LM                                 | Yes       | 0                | 83.2[82.0,84.4] | 78.2[75.1,81.3] | 85.7[84.2,87.2] | 7.5[5.6,9.4]                                                    |
| Philippines           | 2013 | Western Pacific | LM                                 | Yes       | 0                | 84.3[83.3,85.3] | 81.1[78.2,84.0] | 84.9[83.7,86.1] | 3.8[2.3,5.3]                                                    |
| Philippines           | 2008 | Western Pacific | LM                                 | Yes       | 0                | 77.8[76.6,79.0] | 74.6[70.9,78.3] | 78.9[77.5,80.3] | 4.3[2.5,6.1]                                                    |
| Philippines           | 2003 | Western Pacific | LM                                 | Yes       | 0                | 70.4[69.1,71.7] | 69.3[65.2,73.4] | 72.2[70.7,73.7] | 2.9[1.0,4.8]                                                    |
| Rwanda                | 2014 | Africa          | L                                  | Yes       | 1                | 43.9[42.6,45.2] | 38.0[33.9,42.1] | 45.2[43.7,46.7] | 7.2[5.3,9.1]                                                    |
| Rwanda                | 2010 | Africa          | L                                  | Yes       | 1                | 35.4[34.2,36.6] | 34.7[30.2,39.2] | 36.0[34.6,37.4] | 1.3[-0.6,3.2]                                                   |
| Rwanda                | 2005 | Africa          | L                                  | Yes       | 1                | 13.3[12.4,14.2] | 10.0[6.7,13.3]  | 13.7[12.6,14.8] | 3.7[2.3,5.1]                                                    |
| Rwanda                | 2000 | Africa          | L                                  | Yes       | 1                | 12.1[11.3,13.0] | 12.4[9.3,15.5]  | 12.0[10.9,13.1] | -0.4[-1.9,1.1]                                                  |
| Sao Tome and Principe | 2014 | Africa          | LM                                 | No        | 1                | 83.6[82.1,85.1] | 80.6[76.5,84.7] | 86.2[84.4,88.0] | 5.6[3.4,7.8]                                                    |
| Sao Tome and Principe | 2008 | Africa          | LM                                 | No        | 1                | 72.4[70.2,74.6] | 75.8[70.8,80.8] | 71.8[69.0,74.6] | -4.0[-7.3,-0.7]                                                 |
| Senegal               | 2017 | Africa          | L                                  | Yes       | 1                | 53.9[52.8,55.0] | 51.7[49.3,54.1] | 55.0[53.6,56.4] | 3.3[1.6,5.0]                                                    |
| Senegal               | 2016 | Africa          | L                                  | Yes       | 1                | 53.8[52.8,54.8] | 49.9[47.3,52.5] | 55.7[54.4,57.0] | 5.8[4.2,7.4]                                                    |
| Senegal               | 2014 | Africa          | LM                                 | Yes       | 1                | 53.3[52.3,54.3] | 51.7[49.1,54.3] | 53.7[52.4,55.0] | 2.0[0.4,3.6]                                                    |
| Senegal               | 2012 | Africa          | LM                                 | Yes       | 1                | 52.1[50.6,53.6] | 51.1[47.3,54.9] | 52.7[50.9,54.5] | 1.6[-0.7,3.9]                                                   |
| Senegal               | 2010 | Africa          | LM                                 | Yes       | 1                | 50.0[48.9,51.1] | 48.3[45.7,50.9] | 51.3[50.0,52.6] | 3.0[1.3,4.7]                                                    |
| Senegal               | 2005 | Africa          | L                                  | Yes       | 1                | 92.5[91.3,93.7] | 90.0[87.2,92.8] | 92.9[91.5,94.3] | 2.9[1.1,4.7]                                                    |

**Appendix Table 4. Percentage of having four or more antenatal care visits among adolescents 15-19 years old and adult mothers 20-34 years old<sup>1</sup> (continued)**

| Country      | Year | WHO region            | Income classification <sup>2</sup> | Countdown | SSA <sup>3</sup> | 15-34 (%)       | 15-19 (%)       | 20-34 (%)       | Absolute inequality between 20-34 and 15-19 (percentage points) |
|--------------|------|-----------------------|------------------------------------|-----------|------------------|-----------------|-----------------|-----------------|-----------------------------------------------------------------|
| Serbia       | 2014 | Europe                | UM                                 | No        | 0                | 92.7[91.6,93.7] | 91.0[87.6,94.4] | 93.5[92.2,94.8] | 2.5[0.8,4.2]                                                    |
| Serbia       | 2010 | Europe                | UM                                 | No        | 0                | 94.2[93.5,94.9] | 81.6[78.9,84.3] | 95.2[94.4,96.0] | 13.6[12.3,14.9]                                                 |
| Sierra Leone | 2017 | Africa                | L                                  | Yes       | 1                | 77.5[76.1,78.9] | 76.4[72.3,80.5] | 78.1[76.5,79.7] | 1.7[-0.3,3.7]                                                   |
| Sierra Leone | 2013 | Africa                | L                                  | Yes       | 1                | 75.7[75.0,76.4] | 75.3[73.7,76.9] | 75.9[75.0,76.8] | 0.6[-0.5,1.7]                                                   |
| Sierra Leone | 2010 | Africa                | L                                  | Yes       | 1                | 74.7[73.7,75.7] | 76.1[73.8,78.4] | 74.0[72.7,75.3] | -2.1[-3.6,-0.6]                                                 |
| Sierra Leone | 2008 | Africa                | L                                  | Yes       | 1                | 56.1[54.5,57.7] | 56.0[52.4,59.6] | 56.7[54.8,58.6] | 0.7[-1.6,3.0]                                                   |
| Somalia      | 2006 | Africa                | L                                  | Yes       | 1                | 6.3[5.2,7.4]    | 3.1[0.0,6.7]    | 6.5[5.2,7.8]    | 3.4[1.6,5.2]                                                    |
| South Sudan  | 2010 | Africa                | L                                  | Yes       | 1                | 19.3[18.1,20.4] | 19.6[16.9,22.3] | 19.1[17.6,20.6] | -0.5[-2.3,1.3]                                                  |
| Sudan        | 2014 | Africa                | LM                                 | Yes       | 1                | 50.7[49.6,51.8] | 48.0[45.8,50.2] | 50.7[49.3,52.1] | 2.7[1.1,4.3]                                                    |
| Suriname     | 2018 | Americas              | UM                                 | Yes       | 0                | 65.8[64.7,66.9] | 64.6[61.3,67.9] | 66.4[65.1,67.7] | 1.8[0.2,3.4]                                                    |
| Suriname     | 2010 | Americas              | UM                                 | Yes       | 0                | 66.8[65.7,67.9] | 67.1[63.0,71.2] | 66.7[65.4,68.0] | -0.4[-1.9,1.1]                                                  |
| Swaziland    | 2014 | Africa                | LM                                 | Yes       | 1                | 76.1[75.0,77.2] | 67.6[64.6,70.6] | 77.7[76.4,79.0] | 10.1[8.3,11.9]                                                  |
| Tajikistan   | 2017 | Europe                | LM                                 | Yes       | 0                | 67.5[66.3,68.8] | 71.4[67.7,75.1] | 65.6[64.1,67.1] | -5.8[-8.1,-3.5]                                                 |
| Tajikistan   | 2012 | Europe                | L                                  | Yes       | 0                | 54.5[52.9,56.2] | 58.0[52.6,63.4] | 52.8[51.0,54.6] | -5.2[-7.5,-2.9]                                                 |
| Tanzania     | 2015 | Africa                | L                                  | Yes       | 1                | 50.7[49.5,51.9] | 47.3[44.5,50.1] | 51.3[49.8,52.8] | 4.0[2.2,5.8]                                                    |
| Tanzania     | 2010 | Africa                | L                                  | Yes       | 1                | 42.8[41.5,44.1] | 39.7[36.2,43.2] | 45.8[44.2,47.4] | 6.1[4.0,8.2]                                                    |
| Tanzania     | 2004 | Africa                | L                                  | Yes       | 1                | 62.8[61.6,64.1] | 63.7[60.7,66.7] | 62.4[60.9,63.9] | -1.3[-3.2,0.6]                                                  |
| Thailand     | 2015 | South-East Asia       | UM                                 | No        | 0                | 90.8[90.1,91.5] | 88.1[85.9,90.3] | 91.9[91.1,92.7] | 3.8[2.4,5.2]                                                    |
| Thailand     | 2012 | South-East Asia       | UM                                 | No        | 0                | 93.4[92.4,94.4] | 89.4[85.3,93.5] | 94.6[93.3,95.9] | 5.2[3.6,6.8]                                                    |
| Timor-Leste  | 2016 | South-East Asia       | LM                                 | Yes       | 0                | 76.6[75.4,77.8] | 72.9[69.4,76.4] | 77.9[76.4,79.4] | 5.0[3.1,6.9]                                                    |
| Timor-Leste  | 2009 | South-East Asia       | LM                                 | Yes       | 0                | 55.1[54.5,55.7] | 54.3[52.0,56.6] | 59.4[58.7,60.1] | 5.1[4.0,6.2]                                                    |
| Togo         | 2013 | Africa                | L                                  | Yes       | 1                | 57.2[55.8,58.6] | 51.9[47.8,56.0] | 58.8[57.2,60.4] | 6.9[4.8,9.0]                                                    |
| Togo         | 2010 | Africa                | L                                  | Yes       | 1                | 54.9[53.6,56.2] | 50.9[47.8,54.0] | 56.1[54.3,57.9] | 5.2[3.2,7.2]                                                    |
| Tunisia      | 2018 | Eastern Mediterranean | LM                                 | No        | 0                | 84.1[83.4,84.8] | 81.9[80.1,83.7] | 85.4[84.6,86.2] | 3.5[2.3,4.7]                                                    |

**Appendix Table 4. Percentage of having four or more antenatal care visits among adolescents 15-19 years old and adult mothers 20-34 years old<sup>1</sup> (continued)**

| Country                  | Year | WHO region            | Income classification <sup>2</sup> | Countdown | SSA <sup>3</sup> | 15-34 (%)       | 15-19 (%)        | 20-34 (%)       | Absolute inequality between 20-34 and 15-19 (percentage points) |
|--------------------------|------|-----------------------|------------------------------------|-----------|------------------|-----------------|------------------|-----------------|-----------------------------------------------------------------|
| Turkey                   | 2003 | Europe                | LM                                 | No        | 0                | 53.9[52.2,55.6] | 48.1[43.1,53.1]  | 54.4[52.5,56.3] | 6.3[3.9,8.7]                                                    |
| Turkmenistan             | 2015 | Europe                | UM                                 | Yes       | 0                | 96.4[95.3,97.5] | 96.6[93.2,100.0] | 96.4[95.0,97.8] | -0.2[-1.9,1.5]                                                  |
| Uganda                   | 2016 | Africa                | L                                  | Yes       | 1                | 59.9[59.0,60.8] | 59.1[56.9,61.3]  | 61.6[60.4,62.8] | 2.5[1.1,3.9]                                                    |
| Uganda                   | 2011 | Africa                | L                                  | Yes       | 1                | 47.6[46.2,49.0] | 46.7[43.3,50.1]  | 48.6[46.9,50.3] | 1.9[-0.3,4.1]                                                   |
| Uganda                   | 2006 | Africa                | L                                  | Yes       | 1                | 46.5[45.1,47.9] | 46.8[43.4,50.2]  | 46.4[44.7,48.1] | -0.4[-2.5,1.7]                                                  |
| Uganda                   | 2000 | Africa                | L                                  | Yes       | 1                | 41.9[40.4,43.4] | 41.9[38.6,45.2]  | 41.2[39.3,43.1] | -0.7[-3.0,1.6]                                                  |
| Ukraine                  | 2012 | Europe                | LM                                 | No        | 0                | 87.2[85.5,88.9] | 86.3[81.3,91.3]  | 87.3[85.4,89.2] | 1.0[-1.4,3.4]                                                   |
| Ukraine                  | 2007 | Europe                | LM                                 | No        | 0                | 76.8[75.9,77.8] | 74.9[71.3,78.5]  | 77.8[76.7,78.9] | 2.9[1.2,4.6]                                                    |
| Vietnam                  | 2013 | Western Pacific       | LM                                 | No        | 0                | 73.7[73.2,74.2] | 53.5[52.2,54.8]  | 75.6[74.9,76.3] | 22.1[21.2,23.0]                                                 |
| Vietnam                  | 2010 | Western Pacific       | LM                                 | No        | 0                | 59.6[58.4,60.8] | 40.3[36.6,44.0]  | 62.2[60.9,63.5] | 21.9[19.9,23.9]                                                 |
| Vietnam                  | 2002 | Western Pacific       | L                                  | No        | 0                | 30.1[27.5,32.6] | 29.6[21.4,37.8]  | 30.3[27.5,33.1] | 0.7[-2.8,4.2]                                                   |
| West Bank and Gaza Strip | 2014 | Eastern Mediterranean | LM                                 | No        | 0                | 95.5[94.0,97.0] | 94.7[91.8,97.6]  | 95.5[93.7,97.3] | 0.8[-1.4,3.0]                                                   |
| Yemen                    | 2013 | Eastern Mediterranean | LM                                 | Yes       | 0                | 25.1[24.3,25.9] | 26.8[24.5,29.1]  | 24.7[23.7,25.7] | -2.1[-4.3, 0.2]                                                 |
| Zambia                   | 2013 | Africa                | LM                                 | Yes       | 1                | 53.9[52.9,54.9] | 52.8[50.5,55.1]  | 54.4[53.1,55.7] | 1.6[0.1,3.1]                                                    |
| Zambia                   | 2007 | Africa                | L                                  | Yes       | 1                | 60.3[58.8,61.8] | 57.1[53.6,60.6]  | 61.9[60.1,63.7] | 4.8[2.5,7.1]                                                    |
| Zambia                   | 2001 | Africa                | L                                  | Yes       | 1                | 71.6[70.3,72.9] | 68.6[65.7,71.5]  | 74.0[72.4,75.6] | 5.4[3.4,7.4]                                                    |
| Zimbabwe                 | 2019 | Africa                | L                                  | Yes       | 1                | 72.0[70.9,73.1] | 67.9[64.3,71.5]  | 73.2[71.9,74.5] | 5.3[3.6,7.0]                                                    |
| Zimbabwe                 | 2015 | Africa                | L                                  | Yes       | 1                | 75.7[74.5,76.9] | 72.6[69.7,75.5]  | 76.9[75.5,78.3] | 4.3[2.5,6.1]                                                    |
| Zimbabwe                 | 2014 | Africa                | L                                  | Yes       | 1                | 70.1[68.7,71.5] | 65.2[60.9,69.5]  | 70.8[69.2,72.4] | 5.6[3.4,7.8]                                                    |
| Zimbabwe                 | 2010 | Africa                | L                                  | Yes       | 1                | 64.8[63.4,66.2] | 60.6[57.4,63.8]  | 67.0[65.3,68.7] | 6.4[4.3,8.5]                                                    |
| Zimbabwe                 | 2005 | Africa                | L                                  | Yes       | 1                | 71.7[70.3,73.1] | 66.9[63.8,70.0]  | 72.4[70.7,74.1] | 5.5[3.4,7.6]                                                    |



**Appendix Table 5. Percentage of receiving first antenatal care in the first trimester among adolescents 15-19 years old and adult mothers 20-34 years old<sup>1</sup>**

| Country      | Year | WHO region            | Income classification <sup>2</sup> | Countdown | SSA <sup>3</sup> | 15-34 (%)       | 15-19 (%)       | 20-34 (%)       | Absolute inequality between 20-34 and 15-19 (percentage points) |
|--------------|------|-----------------------|------------------------------------|-----------|------------------|-----------------|-----------------|-----------------|-----------------------------------------------------------------|
| Afghanistan  | 2015 | Eastern Mediterranean | L                                  | Yes       | 0                | 30.0[29.1,30.9] | 28.1[25.6,30.6] | 30.5[29.4,31.6] | 2.4[1.0,3.8]                                                    |
| Albania      | 2017 | Europe                | UM                                 | No        | 0                | 92.7[92.0,93.5] | 92.8[90.8,94.8] | 92.7[91.9,93.5] | -0.1[-1.4,1.2]                                                  |
| Albania      | 2008 | Europe                | LM                                 | No        | 0                | 77.8[75.4,80.2] | 72.6[65.9,79.3] | 79.0[76.4,81.6] | 6.4[2.8,10.0]                                                   |
| Angola       | 2015 | Africa                | UM                                 | Yes       | 1                | 40.1[38.9,41.3] | 37.7[35.3,40.1] | 41.8[40.3,43.3] | 4.1[2.3,5.9]                                                    |
| Armenia      | 2015 | Europe                | LM                                 | No        | 0                | 93.6[92.4,94.8] | 91.7[86.7,96.7] | 94.5[93.2,95.8] | 2.8[0.9,4.7]                                                    |
| Armenia      | 2010 | Europe                | LM                                 | No        | 0                | 81.4[79.1,83.7] | 82.9[76.2,89.6] | 80.9[78.4,83.4] | -2.0[-5.1,1.1]                                                  |
| Armenia      | 2005 | Europe                | LM                                 | No        | 0                | 48.2[45.2,51.2] | 50.9[42.3,59.5] | 47.1[43.8,50.4] | -3.8[-7.9,0.3]                                                  |
| Armenia      | 2000 | Europe                | L                                  | No        | 0                | 74.6[71.8,77.4] | 76.0[69.3,82.7] | 73.8[70.6,77.0] | -2.2[-5.9,1.5]                                                  |
| Azerbaijan   | 2006 | Europe                | LM                                 | Yes       | 0                | 53.8[51.3,56.3] | 44.5[36.5,52.5] | 54.9[52.1,57.7] | 10.4[6.9,13.9]                                                  |
| Bangladesh   | 2007 | South-East Asia       | L                                  | Yes       | 0                | 24.4[22.7,26.1] | 21.8[18.8,24.8] | 30.7[28.5,32.9] | 8.9[6.4,11.4]                                                   |
| Bangladesh   | 2004 | South-East Asia       | L                                  | Yes       | 0                | 19.5[17.8,21.2] | 18.7[15.8,21.6] | 24.3[22.1,26.5] | 5.6[3.2,8.0]                                                    |
| Belize       | 2015 | Americas              | UM                                 | No        | 0                | 65.3[64.0,66.6] | 57.5[54.6,60.4] | 66.5[65.0,68.0] | 9.0[7.2,10.8]                                                   |
| Benin        | 2018 | Africa                | L                                  | Yes       | 1                | 17.4[16.3,18.5] | 15.8[12.4,19.2] | 18.0[16.7,19.3] | 2.2[0.6,3.8]                                                    |
| Benin        | 2014 | Africa                | L                                  | Yes       | 1                | 51.4[50.4,52.4] | 48.8[46.2,51.4] | 52.9[51.7,54.1] | 4.1[2.6,5.6]                                                    |
| Benin        | 2011 | Africa                | L                                  | Yes       | 1                | 48.0[46.9,49.1] | 46.2[43.1,49.3] | 48.9[47.6,50.2] | 2.7[1.0,4.4]                                                    |
| Benin        | 2006 | Africa                | L                                  | Yes       | 1                | 41.7[40.7,42.7] | 42.2[39.3,45.1] | 41.4[40.2,42.6] | -0.8[-2.3,0.7]                                                  |
| Benin        | 2001 | Africa                | L                                  | Yes       | 1                | 36.8[35.1,38.5] | 34.6[30.2,39.0] | 37.5[35.5,39.5] | 2.9[0.3,5.5]                                                    |
| Bolivia      | 2008 | Americas              | LM                                 | Yes       | 0                | 61.8[60.6,63.0] | 55.5[52.6,58.4] | 65.0[63.6,66.4] | 9.5[7.8,11.2]                                                   |
| Bolivia      | 2003 | Americas              | LM                                 | Yes       | 0                | 51.4[50.2,52.6] | 43.0[40.1,45.9] | 54.9[53.5,56.3] | 11.9[10.1,13.7]                                                 |
| Burkina Faso | 2010 | Africa                | L                                  | Yes       | 1                | 41.2[40.2,42.2] | 40.5[38.0,43.0] | 42.1[40.9,43.3] | 1.6[0.1,3.1]                                                    |
| Burkina Faso | 2003 | Africa                | L                                  | Yes       | 1                | 28.6[27.3,29.8] | 28.1[24.9,31.3] | 28.7[27.1,30.3] | 0.6[-1.4,2.6]                                                   |
| Burundi      | 2016 | Africa                | L                                  | Yes       | 1                | 49.6[48.5,50.7] | 54.1[50.7,57.5] | 48.1[46.8,49.4] | -6.0[-7.7,-4.3]                                                 |
| Burundi      | 2010 | Africa                | L                                  | Yes       | 1                | 23.3[22.2,24.5] | 25.8[21.9,29.7] | 22.5[21.1,23.9] | -3.3[-5.2,-1.4]                                                 |

**Note:**

1. We mark the countries with absolute inequality (difference) between mothers 20-34 and 15-19 years old larger than 5 percentage points in orange.
2. Income classification: "L" represents "low-income country"; "LM" represents "lower-middle-income country"; "UM" represents "upper-middle-income country".
3. SSA: "1" represents "Sub-Saharan African country"; "0" represents "Not a Sub-Saharan African country".

Appendix Table 5. Percentage of receiving first antenatal care in the first trimester among adolescents 15-19 years old and adult mothers 20-34 years old<sup>1</sup> (continued)

| Country                          | Year | WHO region            | Income classification <sup>2</sup> | Countdown | SSA <sup>3</sup> | 15-34 (%)       | 15-19 (%)       | 20-34 (%)       | Absolute inequality between 20-34 and 15-19 (percentage points) |
|----------------------------------|------|-----------------------|------------------------------------|-----------|------------------|-----------------|-----------------|-----------------|-----------------------------------------------------------------|
| Cambodia                         | 2014 | Western Pacific       | L                                  | Yes       | 0                | 79.0[78.0,80.0] | 76.3[73.5,79.1] | 80.3[79.2,81.4] | 4.0[2.6,5.4]                                                    |
| Cambodia                         | 2010 | Western Pacific       | L                                  | Yes       | 0                | 60.0[58.7,61.2] | 60.4[56.8,64.0] | 59.8[58.4,61.2] | -0.6[-2.3,1.1]                                                  |
| Cambodia                         | 2005 | Western Pacific       | L                                  | Yes       | 0                | 22.6[21.2,24.0] | 21.5[17.4,25.6] | 23.0[21.3,24.7] | 1.5[-0.6,3.6]                                                   |
| Cambodia                         | 2000 | Western Pacific       | L                                  | Yes       | 0                | 21.3[19.7,23.0] | 16.0[11.4,20.6] | 23.1[21.1,25.1] | 7.1[4.7,9.5]                                                    |
| Cameroon                         | 2014 | Africa                | LM                                 | Yes       | 1                | 34.5[33.2,35.8] | 29.4[26.4,32.4] | 35.7[34.1,37.3] | 6.3[4.3,8.3]                                                    |
| Cameroon                         | 2011 | Africa                | LM                                 | Yes       | 1                | 32.9[31.7,34.0] | 31.2[28.7,33.7] | 33.4[32.0,34.8] | 2.2[0.4,4.0]                                                    |
| Cameroon                         | 2004 | Africa                | L                                  | Yes       | 1                | 34.7[33.3,36.1] | 33.2[30.3,36.1] | 36.0[34.2,37.8] | 2.8[0.6,5.0]                                                    |
| Chad                             | 2014 | Africa                | L                                  | Yes       | 1                | 28.1[26.9,29.3] | 28.2[25.6,30.8] | 28.1[26.6,29.6] | -0.1[-1.9,1.7]                                                  |
| Chad                             | 2004 | Africa                | L                                  | Yes       | 1                | 16.7[14.5,18.9] | 13.5[8.8,18.2]  | 17.4[14.5,20.3] | 3.9[0.5,7.3]                                                    |
| Colombia                         | 2005 | Americas              | LM                                 | No        | 0                | 75.4[74.6,76.2] | 63.5[61.6,65.4] | 77.2[76.2,78.2] | 13.7[12.5,14.9]                                                 |
| Colombia                         | 2000 | Americas              | LM                                 | No        | 0                | 75.1[73.6,76.6] | 62.4[58.8,66.0] | 78.2[76.5,79.9] | 15.8[13.7,17.9]                                                 |
| Comoros                          | 2012 | Africa                | L                                  | Yes       | 1                | 57.8[55.6,60.0] | 50.5[44.1,56.9] | 59.4[56.8,62.0] | 8.9[5.4,12.4]                                                   |
| Congo                            | 2014 | Africa                | LM                                 | Yes       | 1                | 49.6[48.3,50.9] | 44.4[41.2,47.6] | 54.9[53.2,56.6] | 10.5[8.5,12.5]                                                  |
| Congo                            | 2011 | Africa                | LM                                 | Yes       | 1                | 43.9[42.6,45.2] | 42.0[39.2,44.8] | 44.5[42.9,46.1] | 2.5[0.5,4.5]                                                    |
| Congo                            | 2005 | Africa                | LM                                 | Yes       | 1                | 45.5[43.8,47.3] | 42.6[38.9,46.3] | 46.5[44.3,48.7] | 3.9[1.3,6.5]                                                    |
| Cuba                             | 2014 | Americas              | UM                                 | No        | 0                | 92.4[91.4,93.4] | 89.6[86.7,92.5] | 92.9[91.7,94.1] | 3.3[1.6,5.0]                                                    |
| Côte d'Ivoire                    | 2016 | Africa                | LM                                 | Yes       | 1                | 33.9[32.7,35.1] | 28.0[25.5,30.5] | 36.0[34.6,37.4] | 8.0[6.3,9.7]                                                    |
| Côte d'Ivoire                    | 2011 | Africa                | LM                                 | Yes       | 1                | 29.8[28.5,31.1] | 24.3[21.3,27.3] | 30.1[28.5,31.7] | 5.8[3.8,7.8]                                                    |
| Democratic Republic of the Congo | 2013 | Africa                | L                                  | Yes       | 1                | 17.0[16.2,17.8] | 15.8[14.0,17.6] | 17.2[16.2,18.2] | 1.4[0.2,2.6]                                                    |
| Democratic Republic of the Congo | 2007 | Africa                | L                                  | Yes       | 1                | 17.7[16.5,18.9] | 18.0[15.2,20.8] | 17.6[16.2,19.0] | -0.4[-2.2,1.4]                                                  |
| Dominican Republic               | 2014 | Americas              | UM                                 | Yes       | 0                | 83.1[81.8,84.4] | 75.7[71.8,79.6] | 85.0[83.5,86.5] | 9.3[7.3,11.3]                                                   |
| Dominican Republic               | 2013 | Americas              | UM                                 | Yes       | 0                | 83.4[82.1,84.7] | 76.9[74.0,79.8] | 84.0[82.4,85.6] | 7.1[5.1,9.1]                                                    |
| Dominican Republic               | 2007 | Americas              | LM                                 | Yes       | 0                | 81.9[81.1,82.7] | 74.0[72.2,75.8] | 82.4[81.4,83.4] | 8.4[7.2,9.6]                                                    |
| Dominican Republic               | 2002 | Americas              | LM                                 | Yes       | 0                | 83.3[82.5,84.1] | 75.7[73.8,77.6] | 83.9[82.9,84.9] | 8.2[7.0,9.4]                                                    |
| Egypt                            | 2014 | Eastern Mediterranean | LM                                 | No        | 0                | 85.7[85.0,86.4] | 84.2[81.9,86.5] | 86.2[85.5,86.9] | 2.0[1.1,2.9]                                                    |
| Egypt                            | 2008 | Eastern Mediterranean | LM                                 | No        | 0                | 59.8[58.9,60.8] | 59.9[57.0,62.8] | 59.8[58.7,60.9] | -0.1[-1.5,1.3]                                                  |
| Egypt                            | 2005 | Eastern Mediterranean | LM                                 | No        | 0                | 54.9[53.9,55.9] | 49.9[46.8,53.0] | 55.3[54.2,56.4] | 5.4[4.0,6.8]                                                    |
| Egypt                            | 2000 | Eastern Mediterranean | LM                                 | No        | 0                | 55.5[54.3,56.7] | 55.8[52.1,59.5] | 55.4[54.0,56.8] | -0.4[-2.1,1.3]                                                  |

**Appendix Table 5. Percentage of receiving first antenatal care in the first trimester among adolescents 15-19 years old and adult mothers 20-34 years old<sup>1</sup> (continued)**

| Country       | Year | WHO region      | Income classification <sup>2</sup> | Countdown | SSA <sup>3</sup> | 15-34 (%)       | 15-19 (%)       | 20-34 (%)       | Absolute inequality between 20-34 and 15-19 (percentage points) |
|---------------|------|-----------------|------------------------------------|-----------|------------------|-----------------|-----------------|-----------------|-----------------------------------------------------------------|
| El Salvador   | 2014 | Americas        | LM                                 | No        | 0                | 83.8[82.7,84.9] | 80.6[77.0,84.2] | 85.6[84.3,86.9] | 5.0[2.8,7.2]                                                    |
| Ethiopia      | 2016 | Africa          | L                                  | Yes       | 1                | 50.6[49.2,51.9] | 48.7[45.1,52.3] | 51.2[49.6,52.8] | 2.5[0.4,4.6]                                                    |
| Ethiopia      | 2011 | Africa          | L                                  | Yes       | 1                | 11.2[9.7,12.7]  | 7.4[3.5,11.3]   | 12.3[10.4,14.2] | 4.9[2.5,7.3]                                                    |
| Ethiopia      | 2005 | Africa          | L                                  | Yes       | 1                | 13.2[11.4,15.0] | 8.0[3.7,12.3]   | 14.9[12.5,17.3] | 6.9[4.0,9.8]                                                    |
| Ethiopia      | 2000 | Africa          | L                                  | Yes       | 1                | 11.7[10.0,13.4] | 10.8[6.2,15.4]  | 12.0[9.8,14.2]  | 1.2[-1.6,4.0]                                                   |
| Gabon         | 2012 | Africa          | UM                                 | Yes       | 1                | 63.6[62.1,65.1] | 55.0[51.8,58.2] | 64.8[62.8,66.8] | 9.8[7.4,12.2]                                                   |
| Gabon         | 2000 | Africa          | UM                                 | Yes       | 1                | 55.7[53.9,57.6] | 49.2[45.8,52.6] | 57.9[55.5,60.3] | 8.7[5.9,11.5]                                                   |
| Gambia        | 2018 | Africa          | L                                  | Yes       | 1                | 45.4[44.1,46.7] | 47.7[44.0,51.4] | 45.1[43.5,46.7] | -2.6[-5.3, 0.2]                                                 |
| Gambia        | 2013 | Africa          | L                                  | Yes       | 1                | 37.7[36.4,39.0] | 33.8[30.6,37.0] | 38.8[37.2,40.4] | 5.0[3.0,7.0]                                                    |
| Ghana         | 2014 | Africa          | LM                                 | Yes       | 1                | 64.0[62.6,65.4] | 56.0[51.5,60.5] | 65.6[63.9,67.3] | 9.6[7.3,11.9]                                                   |
| Ghana         | 2008 | Africa          | L                                  | Yes       | 1                | 55.0[52.9,57.1] | 49.7[43.5,55.9] | 57.6[55.0,60.2] | 7.9[4.5,11.3]                                                   |
| Ghana         | 2003 | Africa          | L                                  | Yes       | 1                | 46.4[44.5,48.3] | 41.8[36.4,47.2] | 48.5[46.1,50.9] | 6.7[3.6,9.8]                                                    |
| Guatemala     | 2014 | Americas        | LM                                 | Yes       | 0                | 68.0[67.1,68.9] | 63.2[61.1,65.3] | 71.2[70.1,72.3] | 8.0[6.7,9.3]                                                    |
| Guinea        | 2018 | Africa          | L                                  | Yes       | 1                | 28.6[27.3,29.9] | 25.3[22.5,28.1] | 29.2[27.5,30.9] | 3.9[1.9,5.9]                                                    |
| Guinea        | 2016 | Africa          | L                                  | Yes       | 1                | 45.1[44.2,46.0] | 41.8[39.1,44.5] | 46.8[45.7,47.9] | 5.0[3.5,6.5]                                                    |
| Guinea        | 2012 | Africa          | L                                  | Yes       | 1                | 40.0[38.5,41.5] | 38.2[35.1,41.3] | 42.4[40.5,44.3] | 4.2[2.0,6.4]                                                    |
| Guinea        | 2005 | Africa          | L                                  | Yes       | 1                | 33.8[32.2,35.4] | 33.4[29.8,37.0] | 35.0[33.0,37.0] | 1.6[-0.9,4.1]                                                   |
| Guinea-Bissau | 2014 | Africa          | L                                  | Yes       | 1                | 37.1[34.9,39.3] | 30.5[24.1,36.9] | 38.6[36.0,41.2] | 8.1[4.9,11.3]                                                   |
| Guyana        | 2014 | Americas        | LM                                 | Yes       | 0                | 54.8[53.5,56.0] | 55.2[51.5,58.9] | 54.6[53.2,56.0] | -0.6[-2.6,1.4]                                                  |
| Guyana        | 2009 | Americas        | LM                                 | Yes       | 0                | 46.4[43.9,49.0] | 41.5[36.2,46.8] | 48.1[45.0,51.2] | 6.6[3.0,10.2]                                                   |
| Haiti         | 2016 | Americas        | L                                  | Yes       | 0                | 64.1[62.5,65.7] | 53.6[49.6,57.6] | 66.1[64.2,68.0] | 12.5[10.0,15.0]                                                 |
| Haiti         | 2012 | Americas        | L                                  | Yes       | 0                | 59.5[58.2,60.8] | 48.4[45.0,51.8] | 60.4[58.8,62.0] | 12.0[9.9,14.1]                                                  |
| Haiti         | 2006 | Americas        | L                                  | Yes       | 0                | 65.1[63.7,66.5] | 56.6[53.0,60.2] | 67.5[66.0,69.0] | 10.9[8.9,12.9]                                                  |
| Haiti         | 2000 | Americas        | L                                  | Yes       | 0                | 58.1[56.5,59.7] | 54.1[49.8,58.4] | 60.6[58.6,62.6] | 6.5[4.0,9.0]                                                    |
| Honduras      | 2011 | Americas        | LM                                 | Yes       | 0                | 77.6[76.7,78.5] | 72.0[70.2,73.8] | 78.1[77.0,79.2] | 6.1[4.8,7.4]                                                    |
| Honduras      | 2006 | Americas        | LM                                 | Yes       | 0                | 68.7[68.1,69.3] | 65.0[62.3,67.7] | 69.6[68.9,70.3] | 4.6[3.5,5.7]                                                    |
| India         | 2015 | South-East Asia | LM                                 | Yes       | 0                | 70.3[70.1,70.5] | 68.1[67.5,68.7] | 70.7[70.5,70.9] | 2.6[2.3,2.9]                                                    |
| India         | 2006 | South-East Asia | L                                  | Yes       | 0                | 43.9[43.2,44.6] | 42.2[39.4,45.0] | 50.6[49.7,51.5] | 8.4[5.9,10.9]                                                   |

**Appendix Table 5. Percentage of receiving first antenatal care in the first trimester among adolescents 15-19 years old and adult mothers 20-34 years old<sup>1</sup> (continued)**

| Country                          | Year | WHO region            | Income classification <sup>2</sup> | Countdown | SSA <sup>3</sup> | 15-34 (%)       | 15-19 (%)       | 20-34 (%)       | Absolute inequality between 20-34 and 15-19 (percentage points) |
|----------------------------------|------|-----------------------|------------------------------------|-----------|------------------|-----------------|-----------------|-----------------|-----------------------------------------------------------------|
| Indonesia                        | 2012 | South-East Asia       | LM                                 | Yes       | 0                | 80.4[79.8,81.0] | 71.0[68.8,73.2] | 82.8[82.1,83.5] | 11.8[10.8,12.8]                                                 |
| Indonesia                        | 2007 | South-East Asia       | LM                                 | Yes       | 0                | 75.3[74.6,76.0] | 69.2[67.0,71.4] | 77.8[77.0,78.6] | 8.6[7.5,9.7]                                                    |
| Indonesia                        | 2002 | South-East Asia       | L                                  | Yes       | 0                | 72.4[71.7,73.1] | 67.0[64.8,69.2] | 74.8[73.9,75.7] | 7.8[6.6,9.0]                                                    |
| Iraq                             | 2018 | Eastern Mediterranean | UM                                 | Yes       | 0                | 56.6[55.9,57.4] | 58.8[56.0,61.6] | 55.9[55.0,56.8] | -2.9[-4.2,-1.6]                                                 |
| Jordan                           | 2018 | Eastern Mediterranean | LM                                 | No        | 0                | 85.6[84.9,86.3] | 86.3[84.3,88.3] | 85.4[84.5,86.3] | -0.9[-2.0,0.2]                                                  |
| Jordan                           | 2012 | Eastern Mediterranean | UM                                 | No        | 0                | 91.6[90.9,92.2] | 90.9[88.2,93.6] | 91.8[91.1,92.5] | 0.9[-0.0,1.8]                                                   |
| Jordan                           | 2007 | Eastern Mediterranean | LM                                 | No        | 0                | 91.1[90.4,91.8] | 92.8[90.0,95.6] | 90.5[89.7,91.3] | -2.3[-3.3,-1.3]                                                 |
| Jordan                           | 2002 | Eastern Mediterranean | LM                                 | No        | 0                | 85.1[84.0,86.2] | 84.7[80.1,89.3] | 85.4[84.2,86.6] | 0.7[-0.9,2.3]                                                   |
| Kazakhstan                       | 2015 | Europe                | UM                                 | No        | 0                | 90.2[88.7,91.7] | 81.9[77.5,86.3] | 91.1[89.4,92.8] | 9.2[7.2,11.2]                                                   |
| Kenya                            | 2014 | Africa                | LM                                 | Yes       | 1                | 19.8[19.1,20.5] | 18.8[17.1,20.5] | 20.1[19.3,20.9] | 1.3[0.3,2.3]                                                    |
| Kenya                            | 2008 | Africa                | L                                  | Yes       | 1                | 14.6[13.4,15.8] | 10.5[7.9,13.1]  | 15.5[14.1,16.9] | 5.0[3.3,6.7]                                                    |
| Kenya                            | 2003 | Africa                | L                                  | Yes       | 1                | 11.1[10.0,12.2] | 11.2[8.5,13.9]  | 11.1[9.7,12.5]  | -0.1[-1.8,1.6]                                                  |
| Kyrgyzstan                       | 2018 | Europe                | LM                                 | Yes       | 0                | 92.6[91.4,93.8] | 89.3[86.2,92.4] | 93.0[91.5,94.5] | 3.7[1.9,5.5]                                                    |
| Kyrgyzstan                       | 2014 | Europe                | LM                                 | Yes       | 0                | 85.8[84.6,87.0] | 85.6[80.6,90.6] | 86.5[85.2,87.8] | 0.9[-1.0,2.8]                                                   |
| Kyrgyzstan                       | 2012 | Europe                | L                                  | Yes       | 0                | 78.8[77.4,80.2] | 74.2[69.1,79.3] | 80.8[79.3,82.3] | 6.6[4.6,8.6]                                                    |
| Lao People's Democratic Republic | 2017 | Western Pacific       | LM                                 | Yes       | 0                | 43.9[42.3,45.5] | 34.3[30.3,38.3] | 46.5[44.5,48.5] | 12.2[10.0,14.4]                                                 |
| Lesotho                          | 2018 | Africa                | LM                                 | Yes       | 1                | 57.1[55.6,58.6] | 46.9[43.6,50.2] | 61.4[59.6,63.2] | 14.5[12.3,16.7]                                                 |
| Lesotho                          | 2014 | Africa                | LM                                 | Yes       | 1                | 41.2[39.2,43.2] | 32.9[28.9,36.9] | 43.4[41.0,45.8] | 10.5[7.7,13.3]                                                  |
| Lesotho                          | 2009 | Africa                | LM                                 | Yes       | 1                | 30.1[28.3,31.8] | 25.2[21.8,28.6] | 31.7[29.5,33.9] | 6.5[4.0,9.0]                                                    |
| Lesotho                          | 2004 | Africa                | L                                  | Yes       | 1                | 30.3[28.5,32.1] | 23.6[20.0,27.2] | 32.6[30.3,34.9] | 9.0[6.3,11.7]                                                   |
| Liberia                          | 2013 | Africa                | L                                  | Yes       | 1                | 66.6[65.3,67.9] | 62.2[59.4,65.0] | 67.5[65.9,69.1] | 5.3[3.3,7.3]                                                    |
| Liberia                          | 2007 | Africa                | L                                  | Yes       | 1                | 58.5[56.9,60.1] | 52.1[48.6,55.6] | 58.9[56.9,60.9] | 6.8[4.4,9.2]                                                    |
| Madagascar                       | 2008 | Africa                | L                                  | Yes       | 1                | 27.4[26.4,28.4] | 26.8[24.6,29.0] | 27.4[26.1,28.7] | 0.6[-1.0,2.2]                                                   |
| Madagascar                       | 2003 | Africa                | L                                  | Yes       | 1                | 20.9[19.4,22.4] | 17.5[13.9,21.1] | 22.6[20.6,24.6] | 5.1[2.7,7.5]                                                    |
| Malawi                           | 2015 | Africa                | L                                  | Yes       | 1                | 24.0[23.3,24.7] | 21.7[20.2,23.2] | 27.0[26.1,27.9] | 5.3[4.2,6.4]                                                    |
| Malawi                           | 2013 | Africa                | L                                  | Yes       | 1                | 21.1[19.8,22.4] | 21.7[18.9,24.5] | 20.9[19.2,22.6] | -0.8[-2.7,1.1]                                                  |
| Malawi                           | 2010 | Africa                | L                                  | Yes       | 1                | 13.0[12.5,13.6] | 13.1[11.7,14.5] | 13.0[12.3,13.7] | -0.1[-1.0,0.8]                                                  |
| Malawi                           | 2004 | Africa                | L                                  | Yes       | 1                | 7.1[6.5,7.8]    | 6.6[5.2,8.0]    | 7.3[6.5,8.1]    | 0.7[-0.2,1.6]                                                   |
| Malawi                           | 2000 | Africa                | L                                  | Yes       | 1                | 6.5[5.9,7.1]    | 5.0[3.8,6.2]    | 6.9[6.2,7.6]    | 1.9[1.0,2.8]                                                    |

**Appendix Table 5. Percentage of receiving first antenatal care in the first trimester among adolescents 15-19 years old and adult mothers 20-34 years old<sup>1</sup> (continued)**

| Country    | Year | WHO region            | Income classification <sup>2</sup> | Countdown | SSA <sup>3</sup> | 15-34 (%)       | 15-19 (%)       | 20-34 (%)       | Absolute inequality between 20-34 and 15-19 (percentage points) |
|------------|------|-----------------------|------------------------------------|-----------|------------------|-----------------|-----------------|-----------------|-----------------------------------------------------------------|
| Maldives   | 2017 | South-East Asia       | UM                                 | No        | 0                | 95.2[93.6,96.8] | 93.6[89.6,97.6] | 95.7[93.8,97.6] | 2.1[-0.3,4.5]                                                   |
| Maldives   | 2009 | South-East Asia       | LM                                 | No        | 0                | 90.3[89.3,91.3] | 88.6[84.5,92.7] | 90.3[89.2,91.4] | 1.7[0.2,3.2]                                                    |
| Mali       | 2018 | Africa                | L                                  | Yes       | 1                | 36.6[35.9,37.2] | 36.8[34.5,39.1] | 36.5[35.8,37.2] | -0.3[-1.4,0.8]                                                  |
| Mali       | 2015 | Africa                | L                                  | Yes       | 1                | 32.7[31.2,34.2] | 30.5[27.3,33.7] | 34.6[32.8,36.4] | 4.1[2.1,6.1]                                                    |
| Mali       | 2012 | Africa                | L                                  | Yes       | 1                | 35.5[34.1,36.9] | 35.4[32.3,38.5] | 35.5[33.8,37.2] | 0.1[-2.0,2.2]                                                   |
| Mali       | 2006 | Africa                | L                                  | Yes       | 1                | 31.6[30.4,32.9] | 33.2[30.5,35.9] | 31.1[29.5,32.7] | -2.1[-4.0,-0.2]                                                 |
| Mali       | 2001 | Africa                | L                                  | Yes       | 1                | 22.5[21.0,24.0] | 22.2[19.0,25.4] | 24.9[23.1,26.7] | 2.7[0.5,4.9]                                                    |
| Mauritania | 2015 | Africa                | LM                                 | Yes       | 1                | 64.4[63.1,65.7] | 59.3[56.5,62.1] | 65.5[63.8,67.2] | 6.2[4.2,8.2]                                                    |
| Mexico     | 2015 | Americas              | UM                                 | No        | 0                | 82.5[80.7,84.3] | 73.6[68.3,78.9] | 86.6[84.4,88.8] | 13.0[10.4,15.6]                                                 |
| Moldova    | 2005 | Europe                | LM                                 | No        | 0                | 71.7[69.3,74.1] | 59.3[52.5,66.1] | 74.1[71.5,76.7] | 14.8[11.5,18.1]                                                 |
| Mongolia   | 2018 | Western Pacific       | LM                                 | No        | 0                | 83.8[80.9,86.7] | 69.8[60.3,79.3] | 84.0[80.7,87.3] | 14.2[10.4,18.0]                                                 |
| Mongolia   | 2013 | Western Pacific       | LM                                 | No        | 0                | 78.8[77.1,80.5] | 59.7[56.8,62.6] | 79.4[77.3,81.5] | 19.7[17.4,22.0]                                                 |
| Mongolia   | 2010 | Western Pacific       | LM                                 | No        | 0                | 77.2[74.4,80.0] | 54.3[45.7,62.9] | 79.3[76.2,82.4] | 25.0[21.2,28.8]                                                 |
| Montenegro | 2018 | Europe                | UM                                 | No        | 0                | 93.2[92.5,93.9] | 92.9[90.6,95.2] | 94.7[93.8,95.6] | 1.8[0.7,2.9]                                                    |
| Morocco    | 2003 | Eastern Mediterranean | LM                                 | Yes       | 0                | 50.9[49.4,52.4] | 44.6[39.4,49.8] | 51.4[49.6,53.2] | 6.8[4.5,9.1]                                                    |
| Mozambique | 2011 | Africa                | L                                  | Yes       | 1                | 14.1[13.3,14.9] | 13.8[12.0,15.6] | 14.2[13.1,15.3] | 0.4[-0.9,1.7]                                                   |
| Mozambique | 2003 | Africa                | L                                  | Yes       | 1                | 16.5[14.6,18.5] | 14.2[8.8,19.6]  | 17.3[15.0,19.6] | 3.1[0.5,5.7]                                                    |
| Myanmar    | 2015 | South-East Asia       | LM                                 | Yes       | 0                | 39.9[38.2,41.6] | 35.3[29.4,41.2] | 40.5[38.5,42.5] | 5.2[2.7,7.7]                                                    |
| Namibia    | 2013 | Africa                | UM                                 | Yes       | 1                | 39.2[37.6,40.7] | 29.4[25.9,32.9] | 42.4[40.5,44.3] | 13.0[10.7,15.3]                                                 |
| Namibia    | 2006 | Africa                | LM                                 | Yes       | 1                | 30.2[28.7,31.7] | 23.2[19.9,26.5] | 32.5[30.7,34.3] | 9.3[7.1,11.5]                                                   |
| Namibia    | 2000 | Africa                | LM                                 | Yes       | 1                | 33.9[32.1,35.7] | 29.2[25.2,33.2] | 35.5[33.3,37.7] | 6.3[3.6,9.0]                                                    |
| Nepal      | 2016 | South-East Asia       | L                                  | Yes       | 0                | 65.1[63.6,66.6] | 63.5[60.5,66.5] | 66.0[64.3,67.7] | 2.5[0.5,4.5]                                                    |
| Nepal      | 2014 | South-East Asia       | L                                  | Yes       | 0                | 50.8[49.3,52.3] | 48.5[44.9,52.1] | 52.3[50.6,54.0] | 3.8[1.9,5.7]                                                    |
| Nepal      | 2011 | South-East Asia       | L                                  | Yes       | 0                | 49.7[48.1,51.3] | 46.0[42.4,49.6] | 52.2[50.3,54.1] | 6.2[3.9,8.5]                                                    |
| Nepal      | 2006 | South-East Asia       | L                                  | Yes       | 0                | 27.7[26.0,29.4] | 28.2[24.6,31.8] | 26.6[24.6,28.6] | -1.6[-4.0,0.8]                                                  |
| Nepal      | 2001 | South-East Asia       | L                                  | Yes       | 0                | 16.4[14.5,18.3] | 14.3[10.4,18.2] | 17.4[15.1,19.7] | 3.1[0.4,5.8]                                                    |

**Appendix Table 5. Percentage of receiving first antenatal care in the first trimester among adolescents 15-19 years old and adult mothers 20-34 years old<sup>1</sup> (continued)**

| Country     | Year | WHO region            | Income classification <sup>2</sup> | Countdown | SSA <sup>3</sup> | 15-34 (%)       | 15-19 (%)       | 20-34 (%)       | Absolute inequality between 20-34 and 15-19 (percentage points) |
|-------------|------|-----------------------|------------------------------------|-----------|------------------|-----------------|-----------------|-----------------|-----------------------------------------------------------------|
| Nicaragua   | 2001 | Americas              | L                                  | Yes       | 0                | 61.0[59.6,62.4] | 54.0[51.2,56.8] | 62.8[61.1,64.5] | 8.8[6.8,10.8]                                                   |
| Niger       | 2012 | Africa                | L                                  | Yes       | 1                | 24.6[23.5,25.7] | 23.1[20.4,25.8] | 25.1[23.8,26.4] | 2.0[0.3,3.7]                                                    |
| Niger       | 2006 | Africa                | L                                  | Yes       | 1                | 13.9[12.3,15.5] | 13.6[9.8,17.4]  | 19.5[17.5,21.5] | 5.9[3.4,8.4]                                                    |
| Nigeria     | 2016 | Africa                | LM                                 | Yes       | 1                | 18.4[17.2,19.6] | 15.1[13.0,17.2] | 18.9[17.4,20.4] | 3.8[2.2,5.4]                                                    |
| Nigeria     | 2013 | Africa                | LM                                 | Yes       | 1                | 17.6[16.9,18.3] | 13.8[11.8,15.8] | 19.1[18.2,20.0] | 5.3[4.1,6.5]                                                    |
| Nigeria     | 2008 | Africa                | LM                                 | Yes       | 1                | 16.2[15.4,17.0] | 15.4[13.0,17.8] | 17.3[16.3,18.3] | 1.9[0.6,3.2]                                                    |
| Nigeria     | 2003 | Africa                | L                                  | Yes       | 1                | 15.5[13.8,17.3] | 13.8[9.5,18.1]  | 16.1[14.0,18.2] | 2.3[-0.4,5.0]                                                   |
| Pakistan    | 2018 | Eastern Mediterranean | LM                                 | Yes       | 0                | 54.6[53.3,55.9] | 51.0[47.5,54.5] | 55.4[53.9,56.9] | 4.4[2.5,6.3]                                                    |
| Pakistan    | 2012 | Eastern Mediterranean | LM                                 | Yes       | 0                | 42.4[41.1,43.7] | 41.0[36.9,45.1] | 45.9[44.4,47.4] | 4.9[3.1,6.7]                                                    |
| Pakistan    | 2006 | Eastern Mediterranean | L                                  | Yes       | 0                | 30.6[29.0,32.2] | 28.0[23.1,32.9] | 31.4[29.5,33.3] | 3.4[1.0,5.8]                                                    |
| Paraguay    | 2016 | Americas              | UM                                 | Yes       | 0                | 81.4[80.4,82.4] | 70.6[67.7,73.5] | 85.0[83.8,86.2] | 14.4[12.9,15.9]                                                 |
| Peru        | 2012 | Americas              | UM                                 | No        | 0                | 69.0[68.1,69.9] | 56.6[54.1,59.1] | 71.1[70.0,72.2] | 14.5[13.0,16.0]                                                 |
| Peru        | 2011 | Americas              | UM                                 | No        | 0                | 63.7[62.7,64.6] | 53.7[51.0,56.4] | 67.0[65.8,68.2] | 13.3[11.8,14.8]                                                 |
| Peru        | 2010 | Americas              | UM                                 | No        | 0                | 66.3[65.3,67.3] | 53.0[50.4,55.6] | 67.0[65.8,68.2] | 14.0[12.5,15.5]                                                 |
| Peru        | 2009 | Americas              | UM                                 | No        | 0                | 72.4[71.5,73.3] | 58.9[56.4,61.4] | 73.3[72.1,74.5] | 14.4[12.9,15.9]                                                 |
| Peru        | 2007 | Americas              | LM                                 | No        | 0                | 72.0[71.3,72.7] | 60.8[58.8,62.8] | 73.3[72.4,74.2] | 12.5[11.4,13.6]                                                 |
| Peru        | 2004 | Americas              | LM                                 | No        | 0                | 69.7[69.0,70.4] | 58.5[56.5,60.5] | 71.0[70.1,71.9] | 12.5[11.4,13.6]                                                 |
| Peru        | 2000 | Americas              | LM                                 | No        | 0                | 65.3[64.3,66.3] | 57.6[55.1,60.1] | 67.9[66.7,69.1] | 10.3[8.8,11.8]                                                  |
| Philippines | 2017 | Western Pacific       | LM                                 | Yes       | 0                | 68.5[67.1,69.9] | 59.8[55.8,63.8] | 71.4[69.8,73.0] | 11.6[9.2,14.0]                                                  |
| Philippines | 2013 | Western Pacific       | LM                                 | Yes       | 0                | 62.3[61.0,63.6] | 49.1[45.4,52.8] | 63.8[62.2,65.4] | 14.7[12.7,16.7]                                                 |
| Philippines | 2008 | Western Pacific       | LM                                 | Yes       | 0                | 54.0[52.6,55.4] | 49.4[45.1,53.7] | 55.7[54.0,57.4] | 6.3[4.2,8.4]                                                    |
| Philippines | 2003 | Western Pacific       | LM                                 | Yes       | 0                | 53.0[51.6,54.4] | 48.1[43.6,52.6] | 55.0[53.3,56.7] | 6.9[4.8,9.0]                                                    |
| Rwanda      | 2014 | Africa                | L                                  | Yes       | 1                | 56.1[54.8,57.4] | 53.4[49.2,57.6] | 58.4[56.9,59.9] | 5.0[3.1,6.9]                                                    |
| Rwanda      | 2010 | Africa                | L                                  | Yes       | 1                | 39.3[38.1,40.5] | 39.2[34.5,43.9] | 39.3[37.9,40.7] | 0.1[-1.8,2.0]                                                   |
| Rwanda      | 2005 | Africa                | L                                  | Yes       | 1                | 9.1[8.4,9.9]    | 10.4[6.8,14.0]  | 8.7[7.8,9.6]    | -1.7[-3.1,-0.3]                                                 |
| Rwanda      | 2000 | Africa                | L                                  | Yes       | 1                | 5.1[4.5,5.7]    | 5.1[2.8,7.4]    | 6.7[5.8,7.6]    | 1.6[0.5,2.7]                                                    |

**Appendix Table 5. Percentage of receiving first antenatal care in the first trimester among adolescents 15-19 years old and adult mothers 20-34 years old<sup>1</sup> (continued)**

| Country               | Year | WHO region            | Income classification <sup>2</sup> | Countdown | SSA <sup>3</sup> | 15-34 (%)       | 15-19 (%)       | 20-34 (%)       | Absolute inequality between 20-34 and 15-19 (percentage points) |
|-----------------------|------|-----------------------|------------------------------------|-----------|------------------|-----------------|-----------------|-----------------|-----------------------------------------------------------------|
| Sao Tome and Principe | 2014 | Africa                | LM                                 | No        | 1                | 69.6[67.0,72.3] | 71.0[64.3,77.7] | 69.2[66.1,72.3] | -1.8[-5.7,2.1]                                                  |
| Sao Tome and Principe | 2008 | Africa                | LM                                 | No        | 1                | 50.5[47.9,53.1] | 51.9[45.6,58.2] | 42.4[39.1,45.7] | -9.5[-13.5,-5.5]                                                |
| Senegal               | 2017 | Africa                | L                                  | Yes       | 1                | 64.5[63.2,65.7] | 63.4[60.5,66.3] | 64.8[63.2,66.4] | 1.4[-0.4,3.2]                                                   |
| Senegal               | 2016 | Africa                | L                                  | Yes       | 1                | 61.2[60.2,62.2] | 59.7[57.1,62.3] | 62.5[61.3,63.7] | 2.8[1.2,4.4]                                                    |
| Senegal               | 2014 | Africa                | LM                                 | Yes       | 1                | 60.3[59.3,61.3] | 59.0[56.3,61.7] | 61.9[60.6,63.2] | 2.9[1.3,4.5]                                                    |
| Senegal               | 2012 | Africa                | LM                                 | Yes       | 1                | 59.6[58.1,61.1] | 58.5[54.6,62.4] | 60.6[58.8,62.4] | 2.1[-0.2,4.4]                                                   |
| Senegal               | 2010 | Africa                | LM                                 | Yes       | 1                | 60.7[59.6,61.8] | 58.2[55.5,60.9] | 61.4[60.1,62.7] | 3.2[1.5,4.9]                                                    |
| Senegal               | 2005 | Africa                | L                                  | Yes       | 1                | 71.1[69.9,72.3] | 68.8[65.9,71.7] | 71.9[70.5,73.3] | 3.1[1.3,4.9]                                                    |
| Serbia                | 2014 | Europe                | UM                                 | No        | 0                | 94.3[93.1,95.5] | 83.4[80.4,86.4] | 94.4[92.9,95.9] | 11.0[9.2,12.8]                                                  |
| Sierra Leone          | 2017 | Africa                | L                                  | Yes       | 1                | 46.4[45.1,47.7] | 42.0[37.4,46.6] | 47.6[46.1,49.1] | 5.6[3.7,7.5]                                                    |
| Sierra Leone          | 2013 | Africa                | L                                  | Yes       | 1                | 44.5[43.4,45.6] | 38.8[36.5,41.1] | 46.3[45.0,47.6] | 7.5[5.9,9.1]                                                    |
| Sierra Leone          | 2008 | Africa                | L                                  | Yes       | 1                | 30.0[28.5,31.5] | 26.8[23.3,30.3] | 30.5[28.6,32.4] | 3.7[1.4,6.0]                                                    |
| Sudan                 | 2014 | Africa                | LM                                 | Yes       | 1                | 46.5[45.6,47.4] | 51.2[48.9,53.5] | 46.5[45.4,47.6] | -4.7[-6.1,-3.3]                                                 |
| Suriname              | 2018 | Americas              | UM                                 | Yes       | 0                | 56.2[54.7,57.7] | 45.4[41.7,49.1] | 57.9[56.2,59.6] | 12.5[10.3,14.7]                                                 |
| Swaziland             | 2014 | Africa                | LM                                 | Yes       | 1                | 36.9[35.2,38.6] | 30.1[26.4,33.8] | 37.5[35.1,39.9] | 7.4[4.8,10.0]                                                   |
| Tajikistan            | 2017 | Europe                | LM                                 | Yes       | 0                | 74.2[71.9,76.6] | 74.9[68.6,81.2] | 74.0[71.1,76.9] | -0.9[-4.2,2.4]                                                  |
| Tajikistan            | 2012 | Europe                | L                                  | Yes       | 0                | 54.1[52.3,55.8] | 57.9[52.5,63.3] | 52.8[50.9,54.7] | -5.1[-7.5,-2.7]                                                 |
| Tanzania              | 2015 | Africa                | L                                  | Yes       | 1                | 24.4[23.4,25.4] | 23.2[20.9,25.5] | 25.6[24.3,26.9] | 2.4[0.9,3.9]                                                    |
| Tanzania              | 2010 | Africa                | L                                  | Yes       | 1                | 15.8[14.8,16.7] | 15.3[12.6,18.0] | 15.9[14.7,17.1] | 0.6[-1.0,2.2]                                                   |
| Tanzania              | 2004 | Africa                | L                                  | Yes       | 1                | 11.9[10.9,12.8] | 12.1[9.8,14.4]  | 11.8[10.7,12.9] | -0.3[-1.7,1.1]                                                  |
| Thailand              | 2015 | South-East Asia       | UM                                 | No        | 0                | 79.8[78.6,81.0] | 61.9[58.6,65.2] | 83.2[81.8,84.6] | 21.3[19.4,23.2]                                                 |
| Timor-Leste           | 2016 | South-East Asia       | LM                                 | Yes       | 0                | 66.9[65.9,67.9] | 60.0[55.8,64.2] | 67.8[66.7,68.9] | 7.8[6.2,9.4]                                                    |
| Timor-Leste           | 2009 | South-East Asia       | LM                                 | Yes       | 0                | 45.3[44.3,46.3] | 39.7[35.6,43.8] | 47.5[46.4,48.6] | 7.8[6.3,9.3]                                                    |
| Togo                  | 2013 | Africa                | L                                  | Yes       | 1                | 27.7[26.4,29.0] | 25.6[21.9,29.3] | 28.1[26.6,29.6] | 2.5[0.5,4.5]                                                    |
| Tunisia               | 2018 | Eastern Mediterranean | LM                                 | No        | 0                | 84.4[83.2,85.6] | 83.2[79.9,86.5] | 85.2[83.8,86.6] | 2.0[-0.0,4.0]                                                   |
| Turkey                | 2003 | Europe                | LM                                 | No        | 0                | 54.8[53.1,56.6] | 50.1[44.8,55.4] | 56.4[54.5,58.3] | 6.3[3.8,8.8]                                                    |

**Appendix Table 5. Percentage of receiving first antenatal care in the first trimester among adolescents 15-19 years old and adult mothers 20-34 years old<sup>1</sup> (continued)**

| Country                  | Year | WHO region            | Income classification <sup>2</sup> | Countdown | SSA <sup>3</sup> | 15-34 (%)       | 15-19 (%)       | 20-34 (%)       | Absolute inequality between 20-34 and 15-19 (percentage points) |
|--------------------------|------|-----------------------|------------------------------------|-----------|------------------|-----------------|-----------------|-----------------|-----------------------------------------------------------------|
| Turkmenistan             | 2015 | Europe                | UM                                 | Yes       | 0                | 88.6[87.1,90.1] | 87.7[83.3,92.1] | 88.6[86.9,90.3] | 0.9[-1.2,3.0]                                                   |
| Uganda                   | 2016 | Africa                | L                                  | Yes       | 1                | 29.1[28.2,30.0] | 27.0[25.0,29.0] | 31.0[29.9,32.1] | 4.0[2.6,5.4]                                                    |
| Uganda                   | 2011 | Africa                | L                                  | Yes       | 1                | 20.8[19.6,22.0] | 21.0[18.0,24.0] | 20.5[19.0,22.0] | -0.5[-2.4,1.4]                                                  |
| Uganda                   | 2006 | Africa                | L                                  | Yes       | 1                | 16.0[14.9,17.1] | 16.0[13.3,18.7] | 16.0[14.6,17.4] | 0.0[-1.7,1.7]                                                   |
| Uganda                   | 2000 | Africa                | L                                  | Yes       | 1                | 15.9[14.8,17.0] | 15.5[13.0,18.0] | 16.0[14.6,17.4] | 0.5[-1.3,2.3]                                                   |
| Ukraine                  | 2007 | Europe                | LM                                 | No        | 0                | 83.6[81.5,85.7] | 77.2[70.6,83.8] | 84.8[82.4,87.2] | 7.6[4.2,11.0]                                                   |
| Vietnam                  | 2013 | Western Pacific       | LM                                 | No        | 0                | 84.7[83.3,86.1] | 69.4[65.3,73.5] | 86.2[84.5,87.9] | 16.8[14.4,19.2]                                                 |
| Vietnam                  | 2002 | Western Pacific       | L                                  | No        | 0                | 65.1[62.2,68.0] | 59.1[49.6,68.6] | 66.1[63.0,69.2] | 7.0[3.1,10.9]                                                   |
| West Bank and Gaza Strip | 2014 | Eastern Mediterranean | LM                                 | No        | 0                | 85.4[84.7,86.1] | 85.6[82.8,88.4] | 84.0[83.3,84.7] | -1.6[-3.6,0.4]                                                  |
| Yemen                    | 2013 | Eastern Mediterranean | LM                                 | Yes       | 0                | 30.6[29.4,31.8] | 32.2[28.9,35.5] | 30.5[29.0,32.0] | -1.7[-3.6,0.2]                                                  |
| Zambia                   | 2013 | Africa                | LM                                 | Yes       | 1                | 24.4[23.5,25.3] | 21.9[20.0,23.8] | 25.3[24.2,26.4] | 3.4[2.1,4.7]                                                    |
| Zambia                   | 2007 | Africa                | L                                  | Yes       | 1                | 19.2[18.0,20.4] | 14.4[11.8,17.0] | 20.4[18.9,21.9] | 6.0[4.2,7.8]                                                    |
| Zambia                   | 2001 | Africa                | L                                  | Yes       | 1                | 14.3[13.2,15.4] | 11.7[9.5,13.9]  | 14.3[13.0,15.6] | 2.6[1.0,4.2]                                                    |
| Zimbabwe                 | 2019 | Africa                | L                                  | Yes       | 1                | 40.1[38.9,41.3] | 36.0[33.5,38.5] | 40.7[39.1,42.3] | 4.7[3.0,6.4]                                                    |
| Zimbabwe                 | 2015 | Africa                | L                                  | Yes       | 1                | 36.6[35.1,38.0] | 33.2[30.0,36.4] | 37.7[36.0,39.4] | 4.5[2.4,6.6]                                                    |
| Zimbabwe                 | 2014 | Africa                | L                                  | Yes       | 1                | 31.2[30.2,32.2] | 29.9[27.3,32.5] | 31.3[30.0,32.6] | 1.4[-0.2,3.0]                                                   |
| Zimbabwe                 | 2010 | Africa                | L                                  | Yes       | 1                | 18.6[17.3,19.9] | 17.0[14.2,19.8] | 19.1[17.6,20.6] | 2.1[0.3,3.9]                                                    |
| Zimbabwe                 | 2005 | Africa                | L                                  | Yes       | 1                | 25.7[24.3,27.2] | 22.5[19.5,25.5] | 26.8[25.1,28.5] | 4.3[2.2,6.4]                                                    |



**Appendix Table 6. Percentage of delivering with skilled birth attendants among adolescents 15-19 years old and adult mothers 20-34 years old<sup>1</sup>**

| Country     | Year | WHO region            | Income classification <sup>2</sup> | Countdown | SSA <sup>3</sup> | 15-34 (%)         | 15-19 (%)        | 20-34 (%)         | Absolute inequality between 20-34 and 15-19 (percentage points) |
|-------------|------|-----------------------|------------------------------------|-----------|------------------|-------------------|------------------|-------------------|-----------------------------------------------------------------|
| Afghanistan | 2015 | Eastern Mediterranean | L                                  | Yes       | 0                | 50.5[50.0,51.0]   | 49.1[47.3,50.9]  | 50.9[50.2,51.6]   | 1.8[0.9,2.7]                                                    |
| Afghanistan | 2010 | Eastern Mediterranean | L                                  | Yes       | 0                | 38.6[37.6,39.6]   | 38.2[33.9,42.5]  | 38.9[37.3,40.5]   | 0.7[-1.4,2.8]                                                   |
| Albania     | 2017 | Europe                | UM                                 | No        | 0                | 99.5[99.1,99.9]   | 99.0[96.8,100.0] | 99.7[99.0,100.0]  | 0.7[-0.5,1.9]                                                   |
| Albania     | 2008 | Europe                | LM                                 | No        | 0                | 99.3[98.4,100.0]  | 98.5[93.2,100.0] | 99.3[97.9,100.0]  | 0.8[-0.9,2.5]                                                   |
| Algeria     | 2012 | Africa                | UM                                 | Yes       | 0                | 96.6[95.6,97.6]   | 94.8[91.1,98.5]  | 96.8[95.3,98.3]   | 2.0[0.1,3.9]                                                    |
| Algeria     | 2006 | Africa                | LM                                 | Yes       | 0                | 95.2[94.6,95.8]   | 83.1[81.3,84.9]  | 96.3[95.4,97.2]   | 13.2[12.1,14.3]                                                 |
| Angola      | 2015 | Africa                | UM                                 | Yes       | 1                | 49.6[48.8,50.4]   | 49.3[47.3,51.3]  | 50.4[49.2,51.6]   | 1.1[-0.3,2.5]                                                   |
| Armenia     | 2015 | Europe                | LM                                 | No        | 0                | 99.8[98.8,100.0]  | 99.0[93.9,100.0] | 99.8[98.3,100.0]  | 0.8[-1.3,2.9]                                                   |
| Armenia     | 2010 | Europe                | LM                                 | No        | 0                | 99.5[98.5,100.0]  | 98.0[92.8,100.0] | 99.5[97.9,100.0]  | 1.5[-0.7,3.7]                                                   |
| Armenia     | 2005 | Europe                | LM                                 | No        | 0                | 99.0[98.1,99.9]   | 99.0[93.7,100.0] | 99.0[97.6,100.0]  | 0.0[-2.0,2.0]                                                   |
| Armenia     | 2000 | Europe                | L                                  | No        | 0                | 96.8[95.8,97.8]   | 96.3[91.4,100.0] | 96.9[95.5,98.3]   | 0.6[-1.4,2.6]                                                   |
| Azerbaijan  | 2006 | Europe                | LM                                 | Yes       | 0                | 88.6[87.8,89.4]   | 85.8[80.8,90.8]  | 88.9[87.6,90.2]   | 3.1[1.2,5.0]                                                    |
| Bangladesh  | 2014 | South-East Asia       | LM                                 | Yes       | 0                | 42.1[41.6,42.6]   | 40.8[39.7,41.9]  | 42.8[42.2,43.4]   | 2.0[1.2,2.8]                                                    |
| Bangladesh  | 2011 | South-East Asia       | L                                  | Yes       | 0                | 31.7[31.2,32.2]   | 31.3[30.1,32.5]  | 31.9[31.3,32.5]   | 0.6[-0.2,1.4]                                                   |
| Bangladesh  | 2007 | South-East Asia       | L                                  | Yes       | 0                | 18.0[17.5,18.5]   | 16.8[15.5,18.1]  | 18.6[17.9,19.3]   | 1.8[0.9,2.7]                                                    |
| Bangladesh  | 2006 | South-East Asia       | L                                  | Yes       | 0                | 20.1[19.6,20.6]   | 18.0[16.7,19.3]  | 21.0[20.3,21.7]   | 3.0[2.1,3.9]                                                    |
| Bangladesh  | 2004 | South-East Asia       | L                                  | Yes       | 0                | 13.4[12.9,13.9]   | 11.7[10.5,12.9]  | 14.4[13.7,15.1]   | 2.7[1.9,3.5]                                                    |
| Belarus     | 2012 | Europe                | UM                                 | No        | 0                | 99.7[99.1,100.0]  | 99.0[96.9,100.0] | 99.9[99.0,100.0]  | 0.9[-0.1,1.9]                                                   |
| Belarus     | 2005 | Europe                | LM                                 | No        | 0                | 100.0[99.1,100.0] | 99.0[95.6,100.0] | 100.0[98.8,100.0] | 1.0[-0.4,2.4]                                                   |
| Belize      | 2015 | Americas              | UM                                 | No        | 0                | 100.0[98.9,100.0] | 99.0[95.6,100.0] | 100.0[98.4,100.0] | 1.0[-1.0,3.0]                                                   |
| Belize      | 2011 | Americas              | LM                                 | No        | 0                | 96.2[95.8,96.6]   | 96.2[94.5,97.9]  | 96.4[95.6,97.2]   | 0.2[-0.9,1.3]                                                   |
| Belize      | 2006 | Americas              | UM                                 | No        | 0                | 98.2[97.2,99.3]   | 99.0[95.9,100.0] | 98.0[96.6,99.4]   | -1.0[-2.8,0.8]                                                  |

**Note:**

1. We mark the countries with absolute inequality (difference) between mothers 20-34 and 15-19 years old larger than 5 percentage points in orange.
2. Income classification: "L" represents "low-income country"; "LM" represents "lower-middle-income country"; "UM" represents "upper-middle-income country".
3. SSA: "1" represents "Sub-Saharan African country"; "0" represents "Not a Sub-Saharan African country".

Appendix Table 6. Percentage of delivering with skilled birth attendants among adolescents 15-19 years old and adult mothers 20-34 years old<sup>1</sup> (continued)

| Country                  | Year | WHO region      | Income classification <sup>2</sup> | Countdown | SSA <sup>3</sup> | 15-34 (%)        | 15-19 (%)        | 20-34 (%)        | Absolute inequality between 20-34 and 15-19 (percentage points) |
|--------------------------|------|-----------------|------------------------------------|-----------|------------------|------------------|------------------|------------------|-----------------------------------------------------------------|
| Benin                    | 2018 | Africa          | L                                  | Yes       | 1                | 57.9[57.1,58.7]  | 60.6[57.6,63.6]  | 57.0[55.7,58.3]  | -3.6[-5.3,-1.9]                                                 |
| Benin                    | 2014 | Africa          | L                                  | Yes       | 1                | 77.2[76.6,77.8]  | 75.2[73.4,77.0]  | 77.3[76.3,78.3]  | 2.1[0.9,3.3]                                                    |
| Benin                    | 2011 | Africa          | L                                  | Yes       | 1                | 84.1[83.3,84.9]  | 83.1[80.6,85.6]  | 84.2[83.2,85.2]  | 1.1[-0.2,2.4]                                                   |
| Benin                    | 2006 | Africa          | L                                  | Yes       | 1                | 77.7[77.0,78.4]  | 73.9[71.6,76.2]  | 78.7[77.7,79.7]  | 4.8[3.6,6.0]                                                    |
| Benin                    | 2001 | Africa          | L                                  | Yes       | 1                | 65.5[64.3,66.7]  | 63.7[60.0,67.4]  | 66.2[64.5,67.9]  | 2.5[0.3,4.7]                                                    |
| Bhutan                   | 2010 | South-East Asia | LM                                 | Yes       | 0                | 64.5[63.5,65.5]  | 57.2[52.2,62.2]  | 66.2[64.7,67.7]  | 9.0[6.8,11.2]                                                   |
| Bolivia                  | 2008 | Americas        | LM                                 | Yes       | 0                | 72.8[72.1,73.5]  | 74.3[71.9,76.7]  | 72.3[71.2,73.4]  | -2.0[-3.4,-0.6]                                                 |
| Bolivia                  | 2003 | Americas        | LM                                 | Yes       | 0                | 63.3[62.6,64.0]  | 70.2[67.9,72.5]  | 61.0[59.9,62.1]  | -9.2[-10.6,-7.8]                                                |
| Bosnia and Herzegovina   | 2006 | Europe          | LM                                 | No        | 0                | 99.4[98.4,100.0] | 99.0[95.2,100.0] | 99.5[98.2,100.0] | 0.5[-1.2,2.2]                                                   |
| Burkina Faso             | 2010 | Africa          | L                                  | Yes       | 1                | 67.6[67.1,68.1]  | 68.2[66.2,70.2]  | 67.4[66.6,68.2]  | -0.8[-1.9,0.3]                                                  |
| Burkina Faso             | 2006 | Africa          | L                                  | Yes       | 1                | 53.5[52.6,54.4]  | 48.2[45.9,50.5]  | 54.8[53.5,56.1]  | 6.6[5.1,8.1]                                                    |
| Burkina Faso             | 2003 | Africa          | L                                  | Yes       | 1                | 56.5[55.8,57.2]  | 53.6[50.9,56.3]  | 57.2[56.0,58.4]  | 3.6[2.0,5.2]                                                    |
| Burundi                  | 2016 | Africa          | L                                  | Yes       | 1                | 86.6[85.9,87.4]  | 88.8[86.2,91.4]  | 85.9[84.9,86.9]  | -2.9[-4.2,-1.6]                                                 |
| Burundi                  | 2010 | Africa          | L                                  | Yes       | 1                | 63.1[62.2,64.1]  | 69.5[65.7,73.3]  | 61.0[59.5,62.5]  | -8.5[-10.5,-6.5]                                                |
| Burundi                  | 2005 | Africa          | L                                  | Yes       | 1                | 36.8[36.1,37.6]  | 41.1[38.4,43.8]  | 35.4[34.4,36.4]  | -5.7[-7.1,-4.3]                                                 |
| Cambodia                 | 2014 | Western Pacific | L                                  | Yes       | 0                | 89.0[88.3,89.7]  | 88.3[85.4,91.2]  | 89.9[88.9,90.9]  | 1.6[0.3,2.9]                                                    |
| Cambodia                 | 2010 | Western Pacific | L                                  | Yes       | 0                | 72.2[71.6,72.8]  | 72.1[68.9,75.3]  | 72.2[71.2,73.2]  | 0.1[-1.3,1.5]                                                   |
| Cambodia                 | 2005 | Western Pacific | L                                  | Yes       | 0                | 43.8[43.2,44.4]  | 43.2[40.1,46.3]  | 44.8[43.8,45.8]  | 1.6[0.3,2.9]                                                    |
| Cambodia                 | 2000 | Western Pacific | L                                  | Yes       | 0                | 33.2[33.0,33.4]  | 33.5[32.4,34.6]  | 33.1[32.8,33.4]  | -0.4[-0.8,0.0]                                                  |
| Cameroon                 | 2014 | Africa          | LM                                 | Yes       | 1                | 64.7[64.0,65.4]  | 64.8[63.7,65.9]  | 64.4[63.4,65.4]  | -0.4[-1.4,0.6]                                                  |
| Cameroon                 | 2011 | Africa          | LM                                 | Yes       | 1                | 63.6[62.9,64.3]  | 59.6[57.5,61.7]  | 64.7[63.5,65.9]  | 5.1[3.7,6.5]                                                    |
| Cameroon                 | 2006 | Africa          | LM                                 | Yes       | 1                | 57.9[57.0,58.8]  | 55.4[52.3,58.5]  | 58.7[57.2,60.2]  | 3.3[1.3,5.3]                                                    |
| Cameroon                 | 2004 | Africa          | L                                  | Yes       | 1                | 61.8[60.9,62.7]  | 59.3[57.0,61.6]  | 62.5[61.1,63.9]  | 3.2[1.5,4.9]                                                    |
| Central African Republic | 2010 | Africa          | L                                  | Yes       | 1                | 53.8[52.8,54.8]  | 51.1[48.2,54.0]  | 54.9[53.4,56.4]  | 3.8[2.0,5.6]                                                    |
| Central African Republic | 2006 | Africa          | L                                  | Yes       | 1                | 54.0[53.0,55.0]  | 59.0[55.8,62.2]  | 52.3[50.7,53.9]  | -6.7[-8.6,-4.8]                                                 |
| Chad                     | 2014 | Africa          | L                                  | Yes       | 1                | 24.1[23.6,24.6]  | 24.1[22.5,25.7]  | 24.1[23.3,24.9]  | 0.0[-1.0,1.0]                                                   |
| Chad                     | 2004 | Africa          | L                                  | Yes       | 1                | 14.4[13.7,15.1]  | 14.7[12.0,17.4]  | 14.3[12.9,15.7]  | -0.4[-2.2,1.4]                                                  |
| Colombia                 | 2015 | Americas        | UM                                 | No        | 0                | 95.9[95.2,96.6]  | 94.1[92.8,95.4]  | 96.3[95.1,97.5]  | 2.2[1.0,3.4]                                                    |
| Comoros                  | 2012 | Africa          | L                                  | Yes       | 1                | 82.2[80.9,83.5]  | 80.6[75.6,85.6]  | 82.5[80.4,84.6]  | 1.9[-0.9,4.7]                                                   |

Appendix Table 6. Percentage of delivering with skilled birth attendants among adolescents 15-19 years old and adult mothers 20-34 years old<sup>1</sup> (continued)

| Country                          | Year | WHO region            | Income classification <sup>2</sup> | Countdown | SSA <sup>3</sup> | 15-34 (%)        | 15-19 (%)        | 20-34 (%)        | Absolute inequality between 20-34 and 15-19 (percentage points) |
|----------------------------------|------|-----------------------|------------------------------------|-----------|------------------|------------------|------------------|------------------|-----------------------------------------------------------------|
| Congo                            | 2014 | Africa                | LM                                 | Yes       | 1                | 94.4[93.4,95.4]  | 92.4[89.4,95.4]  | 95.6[94.1,97.1]  | 3.2[1.3,5.1]                                                    |
| Congo                            | 2011 | Africa                | LM                                 | Yes       | 1                | 93.6[92.7,94.5]  | 92.7[90.4,95.0]  | 93.8[92.5,95.1]  | 1.1[-0.5,2.7]                                                   |
| Congo                            | 2005 | Africa                | LM                                 | Yes       | 1                | 68.2[67.3,69.1]  | 68.2[65.8,70.6]  | 69.0[67.6,70.4]  | 0.8[-0.9,2.5]                                                   |
| Costa Rica                       | 2011 | Americas              | UM                                 | No        | 0                | 98.4[97.5,99.3]  | 95.4[91.6,99.2]  | 98.7[97.3,100.0] | 3.3[1.5,5.1]                                                    |
| Cuba                             | 2014 | Americas              | UM                                 | No        | 0                | 99.4[98.5,100.0] | 95.8[92.9,98.7]  | 99.9[98.6,100.0] | 4.1[2.4,5.8]                                                    |
| Côte d'Ivoire                    | 2016 | Africa                | LM                                 | Yes       | 1                | 73.6[72.9,74.3]  | 74.9[72.4,77.4]  | 72.6[71.3,73.9]  | -2.3[-3.9,-0.7]                                                 |
| Côte d'Ivoire                    | 2011 | Africa                | LM                                 | Yes       | 1                | 59.4[58.5,60.3]  | 56.8[54.2,59.4]  | 60.1[58.7,61.5]  | 3.3[1.6,5.0]                                                    |
| Côte d'Ivoire                    | 2006 | Africa                | L                                  | Yes       | 1                | 56.8[56.1,57.5]  | 59.9[57.5,62.3]  | 56.3[55.3,57.3]  | -3.6[-5.0,-2.2]                                                 |
| Democratic Republic of the Congo | 2013 | Africa                | L                                  | Yes       | 1                | 80.1[79.4,80.8]  | 79.7[77.8,81.6]  | 80.6[79.6,81.6]  | 0.9[-0.4,2.2]                                                   |
| Democratic Republic of the Congo | 2010 | Africa                | L                                  | Yes       | 1                | 74.2[73.5,74.9]  | 73.1[70.7,75.5]  | 75.1[74.1,76.1]  | 2.0[0.6,3.4]                                                    |
| Democratic Republic of the Congo | 2007 | Africa                | L                                  | Yes       | 1                | 74.0[73.1,74.9]  | 74.6[71.8,77.4]  | 73.6[72.2,75.0]  | -1.0[-2.8,0.8]                                                  |
| Democratic Republic of the Congo | 2001 | Africa                | L                                  | Yes       | 1                | 60.7[60.0,61.4]  | 51.0[49.2,52.8]  | 63.3[62.4,64.2]  | 12.3[11.2,13.4]                                                 |
| Dominican Republic               | 2014 | Americas              | UM                                 | Yes       | 0                | 98.6[97.9,99.3]  | 97.5[95.5,99.5]  | 98.6[97.6,99.6]  | 1.1[-0.5,2.7]                                                   |
| Dominican Republic               | 2013 | Americas              | UM                                 | Yes       | 0                | 98.3[97.3,99.2]  | 97.9[95.1,100.0] | 98.4[97.1,99.7]  | 0.5[-1.2,2.2]                                                   |
| Dominican Republic               | 2007 | Americas              | LM                                 | Yes       | 0                | 97.6[97.1,98.1]  | 97.3[95.7,98.9]  | 97.7[97.0,98.4]  | 0.4[-0.6,1.4]                                                   |
| Dominican Republic               | 2002 | Americas              | LM                                 | Yes       | 0                | 96.9[96.3,97.4]  | 97.1[95.3,98.9]  | 96.8[96.0,97.6]  | -0.3[-1.4,0.8]                                                  |
| Egypt                            | 2008 | Eastern Mediterranean | LM                                 | No        | 0                | 78.9[78.2,79.6]  | 75.2[72.4,78.0]  | 79.1[78.2,80.0]  | 3.9[2.7,5.1]                                                    |
| Egypt                            | 2005 | Eastern Mediterranean | LM                                 | No        | 0                | 74.2[73.5,74.9]  | 67.9[65.3,70.5]  | 74.9[74.1,75.7]  | 7.0[5.9,8.1]                                                    |
| Egypt                            | 2000 | Eastern Mediterranean | LM                                 | No        | 0                | 60.9[60.2,61.6]  | 56.8[53.8,59.8]  | 61.9[61.0,62.8]  | 5.1[3.9,6.3]                                                    |
| El Salvador                      | 2014 | Americas              | LM                                 | No        | 0                | 96.2[95.3,97.1]  | 95.3[92.3,98.3]  | 96.3[95.0,97.6]  | 1.0[-0.7,2.7]                                                   |
| Ethiopia                         | 2016 | Africa                | L                                  | Yes       | 1                | 28.8[28.2,29.4]  | 31.8[29.5,34.1]  | 27.8[26.8,28.8]  | -4.0[-5.3,-2.7]                                                 |
| Ethiopia                         | 2011 | Africa                | L                                  | Yes       | 1                | 10.0[9.6,10.4]   | 8.6[7.0,10.2]    | 10.9[10.1,11.7]  | 2.3[1.3,3.3]                                                    |
| Ethiopia                         | 2005 | Africa                | L                                  | Yes       | 1                | 5.8[5.8,5.8]     | 5.9[5.9,5.9]     | 5.8[5.8,5.8]     | -0.1[-0.1,-0.1]                                                 |
| Ethiopia                         | 2000 | Africa                | L                                  | Yes       | 1                | 5.6[5.6,5.6]     | 5.0[5.0,5.0]     | 6.1[6.1,6.1]     | 1.1[1.1,1.1]                                                    |
| Gabon                            | 2012 | Africa                | UM                                 | Yes       | 1                | 90.0[89.0,91.0]  | 88.7[86.2,91.2]  | 90.6[89.0,92.2]  | 1.9[0.0,3.8]                                                    |
| Gabon                            | 2000 | Africa                | UM                                 | Yes       | 1                | 83.0[81.8,84.2]  | 83.6[80.9,86.3]  | 82.8[80.9,84.7]  | -0.8[-3.0,1.4]                                                  |
| Gambia                           | 2018 | Africa                | L                                  | Yes       | 1                | 82.7[81.4,84.0]  | 84.6[80.5,88.7]  | 82.6[80.6,84.6]  | -2.0[-4.5,0.5]                                                  |
| Gambia                           | 2013 | Africa                | L                                  | Yes       | 1                | 57.2[56.3,58.1]  | 60.5[57.5,63.5]  | 56.2[54.8,57.6]  | -4.3[-6.1,-2.5]                                                 |
| Gambia                           | 2010 | Africa                | L                                  | Yes       | 1                | 56.6[55.6,57.6]  | 62.5[59.7,65.3]  | 56.0[54.5,57.5]  | -6.5[-8.3,-4.7]                                                 |
| Gambia                           | 2005 | Africa                | L                                  | Yes       | 1                | 58.0[56.7,59.2]  | 60.8[56.7,64.9]  | 57.0[55.3,58.7]  | -3.8[-5.8,-1.8]                                                 |

**Appendix Table 6. Percentage of delivering with skilled birth attendants among adolescents 15-19 years old and adult mothers 20-34 years old<sup>1</sup> (continued)**

| Country       | Year | WHO region      | Income classification <sup>2</sup> | Countdown | SSA <sup>3</sup> | 15-34 (%)       | 15-19 (%)        | 20-34 (%)       | Absolute inequality between 20-34 and 15-19 (percentage points) |
|---------------|------|-----------------|------------------------------------|-----------|------------------|-----------------|------------------|-----------------|-----------------------------------------------------------------|
| Georgia       | 2005 | Europe          | LM                                 | No        | 0                | 98.3[97.3,99.3] | 99.0[93.9,100.0] | 98.3[96.8,99.8] | -0.7[-3.3,1.9]                                                  |
| Ghana         | 2014 | Africa          | LM                                 | Yes       | 1                | 73.7[72.7,74.7] | 71.1[67.4,74.8]  | 74.6[73.1,76.1] | 3.5[1.6,5.4]                                                    |
| Ghana         | 2011 | Africa          | LM                                 | Yes       | 1                | 70.5[69.6,71.4] | 72.0[68.9,75.1]  | 70.0[68.5,71.5] | -2.0[-3.9,-0.1]                                                 |
| Ghana         | 2008 | Africa          | L                                  | Yes       | 1                | 58.7[57.5,59.9] | 51.2[46.6,55.8]  | 60.6[58.6,62.6] | 9.4[6.8,12.0]                                                   |
| Ghana         | 2006 | Africa          | L                                  | Yes       | 1                | 49.7[48.9,50.5] | 35.6[33.0,38.2]  | 50.6[49.4,51.8] | 15.0[13.5,16.5]                                                 |
| Ghana         | 2003 | Africa          | L                                  | Yes       | 1                | 47.6[46.5,48.7] | 47.4[43.3,51.5]  | 47.7[45.9,49.5] | 0.3[-2.0,2.6]                                                   |
| Guatemala     | 2014 | Americas        | LM                                 | Yes       | 0                | 66.9[66.4,67.4] | 66.9[65.0,68.8]  | 66.9[66.1,67.7] | 0.0[-1.1,1.1]                                                   |
| Guinea        | 2018 | Africa          | L                                  | Yes       | 1                | 55.3[54.5,56.1] | 58.2[57.0,59.4]  | 55.2[54.2,56.2] | -3.0[-4.0,-2.0]                                                 |
| Guinea        | 2016 | Africa          | L                                  | Yes       | 1                | 62.7[61.9,63.5] | 62.3[61.1,63.5]  | 64.1[63.1,65.1] | 1.8[0.8,2.8]                                                    |
| Guinea        | 2012 | Africa          | L                                  | Yes       | 1                | 46.0[45.1,46.8] | 45.6[43.1,48.1]  | 46.1[44.7,47.5] | 0.5[-1.2,2.2]                                                   |
| Guinea        | 2005 | Africa          | L                                  | Yes       | 1                | 39.7[38.8,40.5] | 43.8[41.0,46.6]  | 38.3[37.0,39.6] | -5.5[-7.2,-3.8]                                                 |
| Guinea-Bissau | 2014 | Africa          | L                                  | Yes       | 1                | 47.3[46.1,48.6] | 53.5[49.4,57.6]  | 45.3[43.3,47.3] | -8.2[-10.7,-5.7]                                                |
| Guinea-Bissau | 2010 | Africa          | L                                  | Yes       | 1                | 43.0[42.0,44.0] | 51.4[48.9,53.9]  | 42.0[40.5,43.5] | -9.4[-11.2,-7.6]                                                |
| Guinea-Bissau | 2006 | Africa          | L                                  | Yes       | 1                | 38.8[37.8,39.8] | 43.9[41.1,46.7]  | 37.1[35.6,38.6] | -6.8[-8.8,-4.8]                                                 |
| Guyana        | 2014 | Americas        | LM                                 | Yes       | 0                | 92.9[92.0,93.8] | 92.7[89.7,95.7]  | 93.0[91.7,94.3] | 0.3[-1.3,1.9]                                                   |
| Guyana        | 2009 | Americas        | LM                                 | Yes       | 0                | 92.2[90.9,93.4] | 92.6[88.5,96.7]  | 92.0[90.1,93.9] | -0.6[-3.0,1.8]                                                  |
| Guyana        | 2006 | Americas        | LM                                 | Yes       | 0                | 84.2[83.2,85.1] | 84.6[81.7,87.5]  | 84.0[82.7,85.3] | -0.6[-2.2,1.0]                                                  |
| Haiti         | 2016 | Americas        | L                                  | Yes       | 0                | 41.6[41.0,42.2] | 40.2[38.4,42.0]  | 43.4[42.7,44.1] | 3.2[2.1,4.3]                                                    |
| Haiti         | 2012 | Americas        | L                                  | Yes       | 0                | 38.6[38.0,39.2] | 38.3[35.9,40.7]  | 38.7[37.6,39.8] | 0.4[-1.1,1.9]                                                   |
| Haiti         | 2006 | Americas        | L                                  | Yes       | 0                | 27.7[26.5,28.9] | 28.6[24.0,33.2]  | 27.4[26.0,28.8] | -1.2[-3.2,0.8]                                                  |
| Haiti         | 2000 | Americas        | L                                  | Yes       | 0                | 23.8[23.2,24.4] | 28.7[25.9,31.5]  | 23.7[22.6,24.8] | -5.0[-6.5,-3.5]                                                 |
| Honduras      | 2011 | Americas        | LM                                 | Yes       | 0                | 83.5[82.9,84.1] | 84.4[82.6,86.2]  | 83.2[82.3,84.1] | -1.2[-2.3,-0.1]                                                 |
| Honduras      | 2006 | Americas        | LM                                 | Yes       | 0                | 67.8[66.9,68.7] | 69.9[66.9,72.9]  | 67.1[65.8,68.4] | -2.8[-4.7,-0.9]                                                 |
| India         | 2015 | South-East Asia | LM                                 | Yes       | 0                | 81.9[81.9,82.0] | 82.7[82.3,83.1]  | 81.7[81.6,81.8] | -1.0[-1.2,-0.8]                                                 |
| India         | 2006 | South-East Asia | L                                  | Yes       | 0                | 46.6[46.3,46.9] | 46.2[44.9,47.5]  | 47.5[47.5,47.5] | 1.3[0.6,2.0]                                                    |
| Indonesia     | 2012 | South-East Asia | LM                                 | Yes       | 0                | 83.1[82.8,83.4] | 74.3[73.3,75.3]  | 84.2[83.8,84.6] | 9.9[9.4,10.4]                                                   |
| Indonesia     | 2007 | South-East Asia | LM                                 | Yes       | 0                | 73.0[72.6,73.4] | 61.6[60.4,62.8]  | 74.8[74.3,75.3] | 13.2[12.6,13.8]                                                 |
| Indonesia     | 2002 | South-East Asia | L                                  | Yes       | 0                | 66.3[65.9,66.7] | 57.2[55.9,58.5]  | 69.1[68.5,69.7] | 11.9[11.2,12.6]                                                 |

**Appendix Table 6. Percentage of delivering with skilled birth attendants among adolescents 15-19 years old and adult mothers 20-34 years old<sup>1</sup> (continued)**

| Country                          | Year | WHO region            | Income classification <sup>2</sup> | Countdown | SSA <sup>3</sup> | 15-34 (%)        | 15-19 (%)        | 20-34 (%)        | Absolute inequality between 20-34 and 15-19 (percentage points) |
|----------------------------------|------|-----------------------|------------------------------------|-----------|------------------|------------------|------------------|------------------|-----------------------------------------------------------------|
| Iraq                             | 2018 | Eastern Mediterranean | UM                                 | Yes       | 0                | 95.6[95.6,95.6]  | 96.3[95.0,97.6]  | 95.6[95.6,95.6]  | -0.7[-1.3,-0.1]                                                 |
| Iraq                             | 2011 | Eastern Mediterranean | LM                                 | Yes       | 0                | 91.2[90.3,92.1]  | 91.4[88.9,93.9]  | 91.1[89.9,92.3]  | -0.3[-1.8,1.2]                                                  |
| Iraq                             | 2006 | Eastern Mediterranean | LM                                 | Yes       | 0                | 89.1[88.3,89.9]  | 90.1[86.6,93.6]  | 88.8[87.7,89.9]  | -1.3[-3.0,0.4]                                                  |
| Jamaica                          | 2011 | Americas              | UM                                 | Yes       | 0                | 99.1[98.4,99.8]  | 95.7[94.5,96.9]  | 99.7[98.5,100.0] | 4.0[2.8,5.2]                                                    |
| Jamaica                          | 2005 | Americas              | LM                                 | Yes       | 0                | 96.7[96.1,97.3]  | 93.7[91.9,95.5]  | 97.9[97.0,98.8]  | 4.2[3.1,5.3]                                                    |
| Jordan                           | 2018 | Eastern Mediterranean | LM                                 | No        | 0                | 99.7[99.7,99.7]  | 98.1[96.8,99.4]  | 99.7[99.7,99.7]  | 1.6[1.1,2.1]                                                    |
| Jordan                           | 2012 | Eastern Mediterranean | UM                                 | No        | 0                | 99.6[98.7,100.0] | 97.9[94.5,100.0] | 99.7[98.6,100.0] | 1.8[0.5,3.1]                                                    |
| Jordan                           | 2007 | Eastern Mediterranean | LM                                 | No        | 0                | 99.1[98.2,100.0] | 96.7[93.3,100.0] | 99.1[98.0,100.0] | 2.4[1.1,3.7]                                                    |
| Jordan                           | 2002 | Eastern Mediterranean | LM                                 | No        | 0                | 99.5[98.3,100.0] | 98.6[94.0,100.0] | 99.5[98.1,100.0] | 0.9[-0.9,2.7]                                                   |
| Kazakhstan                       | 2015 | Europe                | UM                                 | No        | 0                | 99.4[98.2,100.0] | 98.3[93.7,100.0] | 99.5[97.6,100.0] | 1.2[-1.0,3.4]                                                   |
| Kazakhstan                       | 2010 | Europe                | UM                                 | No        | 0                | 99.6[99.0,100.0] | 99.0[97.8,100.0] | 99.8[99.1,100.0] | 0.8[-0.0,1.6]                                                   |
| Kazakhstan                       | 2006 | Europe                | UM                                 | No        | 0                | 99.8[99.8,99.8]  | 99.0[97.6,100.0] | 99.9[99.9,99.9]  | 0.9[0.4,1.4]                                                    |
| Kenya                            | 2014 | Africa                | LM                                 | Yes       | 1                | 61.8[61.3,62.3]  | 61.1[59.4,62.8]  | 63.1[62.4,63.8]  | 2.0[1.0,3.0]                                                    |
| Kenya                            | 2008 | Africa                | L                                  | Yes       | 1                | 43.8[42.9,44.7]  | 46.7[43.6,49.8]  | 42.9[41.5,44.3]  | -3.8[-5.6,-2.0]                                                 |
| Kenya                            | 2003 | Africa                | L                                  | Yes       | 1                | 43.2[42.3,44.1]  | 46.0[42.9,49.1]  | 42.3[40.9,43.7]  | -3.7[-5.6,-1.8]                                                 |
| Kyrgyzstan                       | 2018 | Europe                | LM                                 | Yes       | 0                | 99.8[98.9,100.0] | 99.0[93.7,100.0] | 99.9[98.5,100.0] | 0.9[-0.9,2.7]                                                   |
| Kyrgyzstan                       | 2014 | Europe                | LM                                 | Yes       | 0                | 98.4[97.4,99.4]  | 96.5[91.4,100.0] | 98.6[97.1,100.0] | 2.1[-0.1,4.3]                                                   |
| Kyrgyzstan                       | 2012 | Europe                | L                                  | Yes       | 0                | 99.1[98.1,100.0] | 98.2[93.6,100.0] | 99.1[97.6,100.0] | 0.9[-1.0,2.8]                                                   |
| Kyrgyzstan                       | 2005 | Europe                | L                                  | Yes       | 0                | 97.6[97.2,98.0]  | 99.0[97.2,100.0] | 97.5[96.8,98.2]  | -1.5[-2.3,-0.7]                                                 |
| Lao People's Democratic Republic | 2017 | Western Pacific       | LM                                 | Yes       | 0                | 64.4[63.5,65.3]  | 55.4[50.3,60.5]  | 67.0[65.7,68.3]  | 11.6[9.9,13.3]                                                  |
| Lao People's Democratic Republic | 2011 | Western Pacific       | LM                                 | Yes       | 0                | 41.5[40.8,42.2]  | 40.0[36.6,43.4]  | 43.0[42.2,43.8]  | 3.0[1.6,4.4]                                                    |
| Lao People's Democratic Republic | 2006 | Western Pacific       | L                                  | Yes       | 0                | 20.3[19.8,20.8]  | 18.8[15.8,21.8]  | 21.9[21.2,22.6]  | 3.1[1.8,4.4]                                                    |
| Lebanon                          | 2011 | Eastern Mediterranean | UM                                 | No        | 0                | 98.5[97.9,99.1]  | 97.4[95.6,99.2]  | 98.9[98.1,99.7]  | 1.5[0.4,2.6]                                                    |
| Lebanon                          | 2005 | Eastern Mediterranean | UM                                 | No        | 0                | 99.1[98.6,99.7]  | 99.0[96.2,100.0] | 99.2[98.4,100.0] | 0.2[-1.2,1.6]                                                   |
| Lesotho                          | 2018 | Africa                | LM                                 | Yes       | 1                | 87.8[85.9,89.8]  | 88.6[83.6,93.6]  | 87.6[85.5,89.7]  | -1.0[-3.7,1.7]                                                  |
| Lesotho                          | 2014 | Africa                | LM                                 | Yes       | 1                | 78.9[77.8,80.1]  | 81.5[78.1,84.9]  | 78.1[76.4,79.8]  | -3.4[-5.6,-1.2]                                                 |
| Lesotho                          | 2009 | Africa                | LM                                 | Yes       | 1                | 62.4[61.4,63.4]  | 62.7[59.7,65.7]  | 62.3[60.7,63.9]  | -0.4[-2.4,1.6]                                                  |
| Lesotho                          | 2004 | Africa                | L                                  | Yes       | 1                | 56.0[55.1,57.0]  | 57.4[54.2,60.6]  | 55.6[53.9,57.3]  | -1.8[-3.9,0.3]                                                  |

**Appendix Table 6. Percentage of delivering with skilled birth attendants among adolescents 15-19 years old and adult mothers 20-34 years old<sup>1</sup> (continued)**

| Country    | Year | WHO region      | Income classification <sup>2</sup> | Countdown | SSA <sup>3</sup> | 15-34 (%)        | 15-19 (%)        | 20-34 (%)        | Absolute inequality between 20-34 and 15-19 (percentage points) |
|------------|------|-----------------|------------------------------------|-----------|------------------|------------------|------------------|------------------|-----------------------------------------------------------------|
| Liberia    | 2013 | Africa          | L                                  | Yes       | 1                | 61.1[60.1,62.1]  | 64.0[61.5,66.5]  | 59.8[58.4,61.2]  | -4.2[-6.0,-2.4]                                                 |
| Liberia    | 2007 | Africa          | L                                  | Yes       | 1                | 47.2[46.2,48.3]  | 48.9[46.0,51.8]  | 46.7[45.1,48.3]  | -2.2[-4.1,-0.3]                                                 |
| Madagascar | 2008 | Africa          | L                                  | Yes       | 1                | 43.9[43.3,44.5]  | 39.2[37.4,41.0]  | 45.1[44.1,46.1]  | 5.9[4.7,7.1]                                                    |
| Madagascar | 2003 | Africa          | L                                  | Yes       | 1                | 51.3[50.3,52.3]  | 47.8[44.8,50.8]  | 51.8[50.3,53.3]  | 4.0[2.1,5.9]                                                    |
| Malawi     | 2015 | Africa          | L                                  | Yes       | 1                | 89.8[89.2,90.4]  | 89.8[88.4,91.2]  | 90.3[89.5,91.1]  | 0.5[-0.5,1.5]                                                   |
| Malawi     | 2013 | Africa          | L                                  | Yes       | 1                | 88.1[87.4,88.7]  | 89.2[87.5,90.9]  | 87.7[86.8,88.6]  | -1.5[-2.6,-0.4]                                                 |
| Malawi     | 2010 | Africa          | L                                  | Yes       | 1                | 72.0[71.4,72.7]  | 73.0[71.3,74.7]  | 71.7[70.8,72.6]  | -1.3[-2.4,-0.2]                                                 |
| Malawi     | 2006 | Africa          | L                                  | Yes       | 1                | 53.6[53.0,54.2]  | 59.3[57.5,61.1]  | 53.3[52.3,54.3]  | -6.0[-7.2,-4.8]                                                 |
| Malawi     | 2004 | Africa          | L                                  | Yes       | 1                | 56.1[55.2,57.0]  | 55.2[52.9,57.5]  | 56.9[55.6,58.2]  | 1.7[0.1,3.3]                                                    |
| Malawi     | 2000 | Africa          | L                                  | Yes       | 1                | 55.6[54.8,56.4]  | 57.2[55.1,59.3]  | 53.5[52.3,54.7]  | -3.7[-5.2,-2.2]                                                 |
| Maldives   | 2017 | South-East Asia | UM                                 | No        | 0                | 99.5[98.6,100.0] | 98.2[93.3,100.0] | 99.6[98.2,100.0] | 1.4[-0.4,3.2]                                                   |
| Maldives   | 2009 | South-East Asia | LM                                 | No        | 0                | 94.8[94.0,95.6]  | 91.5[87.5,95.5]  | 95.3[94.2,96.4]  | 3.8[2.3,5.3]                                                    |
| Mali       | 2018 | Africa          | L                                  | Yes       | 1                | 67.3[66.4,68.2]  | 70.0[67.0,73.0]  | 67.1[65.5,68.7]  | -2.9[-4.7,-1.1]                                                 |
| Mali       | 2015 | Africa          | L                                  | Yes       | 1                | 43.7[43.2,44.2]  | 40.3[38.7,41.9]  | 47.6[46.7,48.5]  | 7.3[6.1,8.5]                                                    |
| Mali       | 2012 | Africa          | L                                  | Yes       | 1                | 58.6[57.7,59.5]  | 60.4[58.0,62.8]  | 58.3[57.0,59.6]  | -2.1[-3.7,-0.5]                                                 |
| Mali       | 2009 | Africa          | L                                  | Yes       | 1                | 29.1[28.6,29.6]  | 30.7[28.7,32.7]  | 29.0[28.0,30.0]  | -1.7[-2.8,-0.6]                                                 |
| Mali       | 2006 | Africa          | L                                  | Yes       | 1                | 49.0[48.4,49.6]  | 51.0[49.2,52.8]  | 48.7[47.7,49.7]  | -2.3[-3.5,-1.1]                                                 |
| Mali       | 2001 | Africa          | L                                  | Yes       | 1                | 40.6[40.0,41.2]  | 42.7[40.9,44.5]  | 40.0[39.0,41.0]  | -2.7[-3.9,-1.5]                                                 |
| Mauritania | 2015 | Africa          | LM                                 | Yes       | 1                | 69.3[68.3,70.3]  | 65.4[62.4,68.4]  | 70.7[69.1,72.3]  | 5.3[3.5,7.1]                                                    |
| Mauritania | 2011 | Africa          | L                                  | Yes       | 1                | 65.1[64.2,66.0]  | 61.0[58.0,64.0]  | 67.6[66.2,69.0]  | 6.6[4.9,8.3]                                                    |
| Mauritania | 2007 | Africa          | L                                  | Yes       | 1                | 63.1[62.1,64.0]  | 64.5[60.1,68.9]  | 62.6[61.1,64.1]  | -1.9[-3.6,-0.2]                                                 |
| Mexico     | 2015 | Americas        | UM                                 | No        | 0                | 97.5[.,100.0]    | 97.5[.,100.0]    | 97.5[.,100.0]    | 0.0[.,.]                                                        |
| Mexico     | 2015 | Americas        | UM                                 | No        | 0                | 97.5[96.6,98.4]  | 97.5[94.3,100.0] | 97.5[96.2,98.8]  | 0.0[-1.7,1.7]                                                   |
| Moldova    | 2012 | Europe          | LM                                 | No        | 0                | 99.2[98.6,99.8]  | 99.0[97.7,100.0] | 99.4[98.4,100.0] | 0.4[-0.6,1.4]                                                   |
| Moldova    | 2005 | Europe          | LM                                 | No        | 0                | 99.4[98.5,100.0] | 99.0[94.9,100.0] | 99.5[98.2,100.0] | 0.5[-1.4,2.4]                                                   |
| Mongolia   | 2018 | Western Pacific | LM                                 | No        | 0                | 99.1[98.5,99.8]  | 99.0[95.6,100.0] | 99.2[98.4,100.0] | 0.2[-1.1,1.5]                                                   |
| Mongolia   | 2013 | Western Pacific | LM                                 | No        | 0                | 98.9[98.0,99.8]  | 97.1[93.3,100.0] | 99.0[97.8,100.0] | 1.9[0.2,3.6]                                                    |
| Mongolia   | 2010 | Western Pacific | LM                                 | No        | 0                | 98.8[98.1,99.5]  | 97.4[94.0,100.0] | 98.9[97.8,100.0] | 1.5[-0.4,3.4]                                                   |
| Mongolia   | 2005 | Western Pacific | L                                  | No        | 0                | 99.2[98.7,99.7]  | 99.0[96.5,100.0] | 99.6[98.9,100.0] | 0.6[-0.5,1.7]                                                   |

**Appendix Table 6. Percentage of delivering with skilled birth attendants among adolescents 15-19 years old and adult mothers 20-34 years old<sup>1</sup> (continued)**

| Country    | Year | WHO region            | Income classification <sup>2</sup> | Countdown | SSA <sup>3</sup> | 15-34 (%)       | 15-19 (%)       | 20-34 (%)       | Absolute inequality between 20-34 and 15-19 (percentage points) |
|------------|------|-----------------------|------------------------------------|-----------|------------------|-----------------|-----------------|-----------------|-----------------------------------------------------------------|
| Montenegro | 2018 | Europe                | UM                                 | No        | 0                | 98.2[97.8,98.6] | 97.6[95.8,99.4] | 98.4[97.7,99.1] | 0.8[-0.3,1.9]                                                   |
| Morocco    | 2003 | Eastern Mediterranean | LM                                 | Yes       | 0                | 62.6[62.0,63.2] | 64.9[61.0,68.8] | 62.2[61.0,63.4] | -2.7[-4.3,-1.1]                                                 |
| Mozambique | 2011 | Africa                | L                                  | Yes       | 1                | 56.0[55.2,56.7] | 60.3[58.2,62.4] | 54.5[53.3,55.7] | -5.8[-7.3,-4.3]                                                 |
| Mozambique | 2008 | Africa                | L                                  | Yes       | 1                | 58.8[57.5,60.0] | 64.0[60.2,67.8] | 57.0[55.0,59.0] | -7.0[-9.5,-4.5]                                                 |
| Mozambique | 2003 | Africa                | L                                  | Yes       | 1                | 47.7[46.7,48.7] | 52.3[49.3,55.3] | 46.6[45.1,48.1] | -5.7[-7.5,-3.9]                                                 |
| Myanmar    | 2015 | South-East Asia       | LM                                 | Yes       | 0                | 60.2[59.5,60.9] | 56.4[52.0,60.8] | 60.5[59.3,61.7] | 4.1[2.4,5.8]                                                    |
| Myanmar    | 2009 | South-East Asia       | L                                  | Yes       | 0                | 70.6[70.1,71.1] | 58.0[55.2,60.8] | 73.2[72.5,73.9] | 15.2[13.9,16.5]                                                 |
| Namibia    | 2013 | Africa                | UM                                 | Yes       | 1                | 88.2[87.2,89.2] | 86.3[83.4,89.2] | 89.9[88.4,91.4] | 3.6[1.8,5.4]                                                    |
| Namibia    | 2006 | Africa                | LM                                 | Yes       | 1                | 81.4[80.5,82.3] | 80.5[77.6,83.4] | 82.9[81.4,84.4] | 2.4[0.6,4.2]                                                    |
| Namibia    | 2000 | Africa                | LM                                 | Yes       | 1                | 77.4[76.3,78.5] | 77.4[74.0,80.8] | 77.4[75.7,79.1] | 0.0[-2.2,2.2]                                                   |
| Nepal      | 2016 | South-East Asia       | L                                  | Yes       | 0                | 58.0[57.3,58.7] | 63.4[60.9,65.9] | 57.0[56.0,58.0] | -6.4[-7.8,-5.0]                                                 |
| Nepal      | 2014 | South-East Asia       | L                                  | Yes       | 0                | 55.6[54.9,56.3] | 55.1[52.1,58.1] | 56.8[55.7,57.9] | 1.7[0.3,3.1]                                                    |
| Nepal      | 2011 | South-East Asia       | L                                  | Yes       | 0                | 36.0[35.4,36.6] | 41.1[38.6,43.6] | 35.9[35.0,36.8] | -5.2[-6.5,-3.9]                                                 |
| Nepal      | 2006 | South-East Asia       | L                                  | Yes       | 0                | 18.7[18.2,19.2] | 21.1[18.9,23.3] | 18.5[17.7,19.3] | -2.6[-3.7,-1.5]                                                 |
| Nepal      | 2001 | South-East Asia       | L                                  | Yes       | 0                | 10.9[10.4,11.4] | 14.2[12.1,16.3] | 10.6[9.9,11.3]  | -3.6[-4.7,-2.5]                                                 |
| Nicaragua  | 2001 | Americas              | L                                  | Yes       | 0                | 67.8[67.0,68.6] | 68.6[66.5,70.7] | 67.5[66.3,68.7] | -1.1[-2.6,0.4]                                                  |
| Niger      | 2012 | Africa                | L                                  | Yes       | 1                | 29.3[28.5,30.1] | 31.6[29.1,34.1] | 28.5[27.3,29.7] | -3.1[-4.6,-1.6]                                                 |
| Niger      | 2006 | Africa                | L                                  | Yes       | 1                | 16.8[16.1,17.5] | 15.8[13.4,18.2] | 17.1[15.9,18.3] | 1.3[-0.2,2.8]                                                   |
| Nigeria    | 2018 | Africa                | LM                                 | Yes       | 1                | 43.3[42.9,43.7] | 29.7[28.3,31.1] | 45.8[45.1,46.5] | 16.1[15.3,16.9]                                                 |
| Nigeria    | 2016 | Africa                | LM                                 | Yes       | 1                | 43.0[42.6,43.4] | 30.4[29.1,31.7] | 45.1[44.4,45.8] | 14.7[13.8,15.6]                                                 |
| Nigeria    | 2013 | Africa                | LM                                 | Yes       | 1                | 38.1[37.7,38.5] | 24.2[22.9,25.5] | 41.1[40.4,41.8] | 16.9[16.1,17.7]                                                 |
| Nigeria    | 2011 | Africa                | LM                                 | Yes       | 1                | 48.7[47.8,49.6] | 27.6[24.9,30.3] | 52.2[50.8,53.6] | 24.6[22.9,26.3]                                                 |
| Nigeria    | 2008 | Africa                | LM                                 | Yes       | 1                | 38.9[38.5,39.3] | 23.6[22.2,25.0] | 42.7[42.0,43.4] | 19.1[18.2,20.0]                                                 |
| Nigeria    | 2007 | Africa                | L                                  | Yes       | 1                | 44.3[43.6,45.0] | 28.1[25.7,30.5] | 49.3[48.3,50.3] | 21.2[20.0,22.4]                                                 |
| Nigeria    | 2003 | Africa                | L                                  | Yes       | 1                | 35.2[34.3,36.1] | 23.2[20.2,26.2] | 37.8[36.2,39.4] | 14.6[12.7,16.5]                                                 |
| Pakistan   | 2018 | Eastern Mediterranean | LM                                 | Yes       | 0                | 69.3[68.6,70.0] | 67.2[65.1,69.3] | 70.4[69.3,71.5] | 3.2[1.9,4.5]                                                    |
| Pakistan   | 2012 | Eastern Mediterranean | LM                                 | Yes       | 0                | 53.2[52.4,53.9] | 54.0[50.7,57.3] | 52.9[51.9,53.9] | -1.1[-2.4,0.2]                                                  |
| Pakistan   | 2006 | Eastern Mediterranean | L                                  | Yes       | 0                | 38.8[38.0,39.6] | 37.8[34.3,41.3] | 40.5[39.4,41.6] | 2.7[1.2,4.2]                                                    |

**Appendix Table 6. Percentage of delivering with skilled birth attendants among adolescents 15-19 years old and adult mothers 20-34 years old<sup>1</sup> (continued)**

| Country               | Year | WHO region      | Income classification <sup>2</sup> | Countdown | SSA <sup>3</sup> | 15-34 (%)        | 15-19 (%)        | 20-34 (%)        | Absolute inequality between 20-34 and 15-19 (percentage points) |
|-----------------------|------|-----------------|------------------------------------|-----------|------------------|------------------|------------------|------------------|-----------------------------------------------------------------|
| Paraguay              | 2016 | Americas        | UM                                 | Yes       | 0                | 95.5[94.6,96.4]  | 95.6[93.3,97.9]  | 95.4[94.1,96.7]  | -0.2[-1.7,1.3]                                                  |
| Peru                  | 2012 | Americas        | UM                                 | No        | 0                | 86.8[86.2,87.4]  | 84.8[82.8,86.8]  | 87.6[86.7,88.5]  | 2.8[1.6,4.0]                                                    |
| Peru                  | 2011 | Americas        | UM                                 | No        | 0                | 85.0[84.4,85.6]  | 83.7[81.5,85.9]  | 85.5[84.6,86.4]  | 1.8[0.6,3.0]                                                    |
| Peru                  | 2010 | Americas        | UM                                 | No        | 0                | 83.8[83.2,84.4]  | 81.1[79.0,83.2]  | 84.8[83.9,85.7]  | 3.7[2.5,4.9]                                                    |
| Peru                  | 2009 | Americas        | UM                                 | No        | 0                | 82.5[81.9,83.1]  | 79.9[77.9,81.9]  | 82.6[81.7,83.5]  | 2.7[1.6,3.8]                                                    |
| Peru                  | 2007 | Americas        | LM                                 | No        | 0                | 79.4[79.0,79.8]  | 78.0[76.4,79.6]  | 80.1[79.4,80.8]  | 2.1[1.2,3.0]                                                    |
| Peru                  | 2004 | Americas        | LM                                 | No        | 0                | 71.6[71.2,72.0]  | 71.6[70.0,73.2]  | 71.6[70.9,72.3]  | 0.0[-0.9,0.9]                                                   |
| Peru                  | 2000 | Americas        | LM                                 | No        | 0                | 59.3[58.9,59.7]  | 56.2[54.4,58.0]  | 60.9[60.2,61.6]  | 4.7[3.7,5.7]                                                    |
| Philippines           | 2017 | Western Pacific | LM                                 | Yes       | 0                | 84.4[83.7,85.1]  | 82.4[78.8,86.0]  | 85.2[84.4,86.0]  | 2.8[1.5,4.1]                                                    |
| Philippines           | 2013 | Western Pacific | LM                                 | Yes       | 0                | 73.9[73.3,74.6]  | 73.8[70.7,76.9]  | 74.0[72.9,75.1]  | 0.2[-1.3,1.7]                                                   |
| Philippines           | 2008 | Western Pacific | LM                                 | Yes       | 0                | 62.2[61.5,62.9]  | 58.0[54.4,61.6]  | 63.8[62.6,65.0]  | 5.8[4.2,7.4]                                                    |
| Philippines           | 2003 | Western Pacific | LM                                 | Yes       | 0                | 59.8[59.1,60.5]  | 54.7[51.1,58.3]  | 62.0[60.8,63.2]  | 7.3[5.7,8.9]                                                    |
| Rwanda                | 2014 | Africa          | L                                  | Yes       | 1                | 91.9[91.1,92.8]  | 93.5[90.3,96.7]  | 91.4[90.2,92.6]  | -2.1[-3.6,-0.6]                                                 |
| Rwanda                | 2010 | Africa          | L                                  | Yes       | 1                | 73.5[72.7,74.3]  | 82.1[78.2,86.0]  | 70.6[69.3,71.9]  | -11.5[-13.1,-9.9]                                               |
| Rwanda                | 2005 | Africa          | L                                  | Yes       | 1                | 42.2[41.6,42.9]  | 49.0[44.4,53.6]  | 40.0[38.8,41.2]  | -9.0[-10.8,-7.2]                                                |
| Rwanda                | 2000 | Africa          | L                                  | Yes       | 1                | 35.5[34.8,36.1]  | 41.9[38.0,45.8]  | 33.3[32.0,34.6]  | -8.6[-10.4,-6.8]                                                |
| Sao Tome and Principe | 2014 | Africa          | LM                                 | No        | 1                | 93.4[92.5,94.4]  | 93.5[90.7,96.3]  | 93.4[91.9,94.9]  | -0.1[-1.8,1.6]                                                  |
| Sao Tome and Principe | 2008 | Africa          | LM                                 | No        | 1                | 81.7[79.8,83.6]  | 84.7[79.7,89.7]  | 81.6[78.9,84.3]  | -3.1[-6.4,0.2]                                                  |
| Senegal               | 2017 | Africa          | L                                  | Yes       | 1                | 68.4[67.7,69.1]  | 66.7[64.2,69.2]  | 68.9[67.9,69.9]  | 2.2[0.8,3.6]                                                    |
| Senegal               | 2016 | Africa          | L                                  | Yes       | 1                | 58.6[57.9,59.3]  | 59.7[57.3,62.1]  | 57.3[56.2,58.4]  | -2.4[-3.8,-1.0]                                                 |
| Senegal               | 2010 | Africa          | LM                                 | Yes       | 1                | 65.1[64.4,65.8]  | 63.6[61.2,66.0]  | 65.2[64.0,66.4]  | 1.6[0.1,3.1]                                                    |
| Senegal               | 2005 | Africa          | L                                  | Yes       | 1                | 82.5[81.8,83.2]  | 79.9[77.4,82.4]  | 82.6[81.4,83.8]  | 2.7[1.1,4.3]                                                    |
| Serbia                | 2014 | Europe          | UM                                 | No        | 0                | 98.4[97.6,99.2]  | 94.3[91.1,97.5]  | 99.4[98.2,100.0] | 5.1[3.5,6.7]                                                    |
| Serbia                | 2010 | Europe          | UM                                 | No        | 0                | 99.7[98.9,100.0] | 97.7[94.7,100.0] | 99.8[98.6,100.0] | 2.1[0.4,3.8]                                                    |
| Serbia                | 2005 | Europe          | UM                                 | No        | 0                | 99.0[98.6,99.4]  | 98.6[96.6,100.0] | 99.1[98.5,99.7]  | 0.5[-0.6,1.6]                                                   |
| Sierra Leone          | 2017 | Africa          | L                                  | Yes       | 1                | 81.6[80.6,82.6]  | 80.4[77.5,83.3]  | 82.1[80.6,83.6]  | 1.7[-0.1,3.5]                                                   |
| Sierra Leone          | 2013 | Africa          | L                                  | Yes       | 1                | 60.8[60.1,61.5]  | 63.6[61.6,65.6]  | 59.9[58.8,61.0]  | -3.7[-5.1,-2.3]                                                 |
| Sierra Leone          | 2010 | Africa          | L                                  | Yes       | 1                | 62.5[61.8,63.2]  | 65.5[63.5,67.5]  | 62.0[61.0,63.0]  | -3.5[-4.8,-2.2]                                                 |
| Sierra Leone          | 2008 | Africa          | L                                  | Yes       | 1                | 43.3[42.3,44.3]  | 43.8[41.0,46.6]  | 43.1[41.6,44.6]  | -0.7[-2.6,1.2]                                                  |
| Sierra Leone          | 2005 | Africa          | L                                  | Yes       | 1                | 43.2[42.2,44.2]  | 48.0[44.4,51.6]  | 43.0[41.4,44.6]  | -5.0[-6.7,-3.3]                                                 |



**Appendix Table 6. Percentage of delivering with skilled birth attendants among adolescents 15-19 years old and adult mothers 20-34 years old<sup>1</sup> (continued)**

| Country                                   | Year | WHO region        | Income classification <sup>2</sup> | Countdown | SSA <sup>3</sup> | 15-34 (%)         | 15-19 (%)        | 20-34 (%)         | Absolute inequality between 20-34 and 15-19 (percentage points) |
|-------------------------------------------|------|-------------------|------------------------------------|-----------|------------------|-------------------|------------------|-------------------|-----------------------------------------------------------------|
| Somalia                                   | 2006 | Africa            | L                                  | Yes       | 1                | 33.0[32.1,33.9]   | 30.4[27.2,33.6]  | 34.6[33.3,35.9]   | 4.2[2.5,5.9]                                                    |
| South Sudan                               | 2010 | Africa            | L                                  | Yes       | 1                | 20.8[19.5,22.0]   | 24.2[20.4,28.0]  | 19.6[17.9,21.3]   | -4.6[-6.7,-2.5]                                                 |
| Sudan                                     | 2014 | Africa            | LM                                 | Yes       | 1                | 77.5[76.8,78.2]   | 75.8[74.0,77.6]  | 78.1[76.7,79.5]   | 2.3[0.8,3.8]                                                    |
| Suriname                                  | 2018 | Americas          | UM                                 | Yes       | 0                | 98.2[97.1,99.3]   | 97.8[94.4,100.0] | 98.3[96.7,99.9]   | 0.5[-1.7,2.7]                                                   |
| Suriname                                  | 2010 | Americas          | UM                                 | Yes       | 0                | 92.2[91.5,92.9]   | 91.6[90.4,92.8]  | 92.4[91.2,93.6]   | 0.8[-0.4,2.0]                                                   |
| Suriname                                  | 2006 | Americas          | LM                                 | Yes       | 0                | 89.8[88.6,91.0]   | 89.6[84.5,94.7]  | 90.8[89.4,92.2]   | 1.2[-0.7,3.1]                                                   |
| Swaziland                                 | 2014 | Africa<br>Eastern | LM                                 | Yes       | 1                | 88.3[87.3,89.3]   | 88.3[85.3,91.3]  | 87.9[86.2,89.6]   | -0.4[-2.5,1.7]                                                  |
| Syrian Arab Republic                      | 2006 | Mediterranean     | LM                                 | No        | 0                | 93.0[93.0,93.0]   | 96.2[95.8,96.6]  | 92.9[92.6,93.2]   | -3.3[-3.6,-3.0]                                                 |
| Tajikistan                                | 2017 | Europe            | LM                                 | Yes       | 0                | 94.8[94.0,95.6]   | 95.5[92.4,98.6]  | 94.7[93.7,95.7]   | -0.8[-2.3,0.7]                                                  |
| Tajikistan                                | 2012 | Europe            | L                                  | Yes       | 0                | 88.6[87.6,89.5]   | 90.2[85.9,94.5]  | 88.0[86.6,89.4]   | -2.2[-4.0,-0.4]                                                 |
| Tajikistan                                | 2005 | Europe            | L                                  | Yes       | 0                | 85.9[85.0,86.8]   | 92.8[88.2,97.4]  | 83.6[82.3,84.9]   | -9.2[-11.4,-7.0]                                                |
| Tanzania                                  | 2015 | Africa            | L                                  | Yes       | 1                | 64.9[64.5,65.4]   | 67.2[65.7,68.7]  | 64.2[63.5,64.9]   | -3.0[-3.9,-2.1]                                                 |
| Tanzania                                  | 2010 | Africa            | L                                  | Yes       | 1                | 50.6[49.7,51.5]   | 55.5[52.5,58.5]  | 50.3[48.9,51.7]   | -5.2[-7.0,-3.4]                                                 |
| Tanzania                                  | 2004 | Africa            | L                                  | Yes       | 1                | 47.3[46.5,48.2]   | 48.9[46.2,51.6]  | 46.8[45.5,48.1]   | -2.1[-3.8,-0.4]                                                 |
| Thailand                                  | 2015 | South-East Asia   | UM                                 | No        | 0                | 98.8[98.1,99.5]   | 98.4[95.5,100.0] | 98.9[97.7,100.0]  | 0.5[-1.2,2.2]                                                   |
| Thailand                                  | 2012 | South-East Asia   | UM                                 | No        | 0                | 99.6[98.9,100.0]  | 98.4[95.4,100.0] | 99.6[98.5,100.0]  | 1.2[-0.4,2.8]                                                   |
| Thailand                                  | 2005 | South-East Asia   | LM                                 | No        | 0                | 97.3[97.1,97.5]   | 97.1[95.5,98.7]  | 97.7[97.7,97.7]   | 0.6[-0.1,1.3]                                                   |
| The former Yugoslav Republic of Macedonia | 2005 | Europe            | LM                                 | No        | 0                | 98.1[97.2,99.0]   | 98.6[95.9,100.0] | 97.0[95.8,98.2]   | -1.6[-3.8,0.6]                                                  |
| Timor-Leste                               | 2009 | South-East Asia   | LM                                 | Yes       | 0                | 31.6[30.6,32.7]   | 32.0[27.4,36.6]  | 31.5[29.9,33.1]   | -0.5[-2.8,1.8]                                                  |
| Togo                                      | 2013 | Africa            | L                                  | Yes       | 1                | 59.3[58.4,60.2]   | 54.9[51.7,58.1]  | 61.8[60.5,63.1]   | 6.9[5.2,8.6]                                                    |
| Togo                                      | 2010 | Africa            | L                                  | Yes       | 1                | 62.5[61.8,63.2]   | 71.3[68.6,74.0]  | 59.6[58.2,61.0]   | -11.7[-13.4,-10.0]                                              |
| Togo                                      | 2006 | Africa<br>Eastern | L                                  | Yes       | 1                | 64.9[64.1,65.8]   | 69.6[67.1,72.1]  | 63.4[62.1,64.7]   | -6.2[-7.7,-4.7]                                                 |
| Tunisia                                   | 2018 | Mediterranean     | LM                                 | No        | 0                | 99.7[99.7,99.7]   | 99.0[97.7,100.0] | 99.8[99.8,99.8]   | 0.8[0.2,1.4]                                                    |
| Turkey                                    | 2003 | Europe            | LM                                 | No        | 0                | 83.0[82.0,84.0]   | 81.9[78.1,85.7]  | 83.6[82.4,84.8]   | 1.7[0.1,3.3]                                                    |
| Turkmenistan                              | 2015 | Europe            | UM                                 | Yes       | 0                | 100.0[99.6,100.0] | 99.0[97.2,100.0] | 100.0[99.2,100.0] | 1.0[-0.2,2.2]                                                   |
| Turkmenistan                              | 2006 | Europe            | LM                                 | Yes       | 0                | 99.1[98.2,100.0]  | 99.0[93.7,100.0] | 99.2[97.8,100.0]  | 0.2[-1.8,2.2]                                                   |

**Appendix Table 6. Percentage of delivering with skilled birth attendants among adolescents 15-19 years old and adult mothers 20-34 years old<sup>1</sup> (continued)**

| Country                  | Year | WHO region            | Income classification <sup>2</sup> | Countdown | SSA <sup>3</sup> | 15-34 (%)        | 15-19 (%)        | 20-34 (%)        | Absolute inequality between 20-34 and 15-19 (percentage points) |
|--------------------------|------|-----------------------|------------------------------------|-----------|------------------|------------------|------------------|------------------|-----------------------------------------------------------------|
| Uganda                   | 2016 | Africa                | L                                  | Yes       | 1                | 74.2[73.5,74.9]  | 77.3[75.4,79.2]  | 74.2[73.2,75.2]  | -3.1[-4.4,-1.8]                                                 |
| Uganda                   | 2011 | Africa                | L                                  | Yes       | 1                | 58.0[57.0,59.0]  | 66.1[63.1,69.1]  | 57.1[55.6,58.6]  | -9.0[-10.9,-7.1]                                                |
| Uganda                   | 2006 | Africa                | L                                  | Yes       | 1                | 42.1[41.2,43.0]  | 48.9[45.9,51.9]  | 41.9[40.5,43.3]  | -7.0[-8.9,-5.1]                                                 |
| Uganda                   | 2000 | Africa                | L                                  | Yes       | 1                | 39.0[38.2,39.8]  | 47.2[44.9,49.5]  | 37.7[36.5,38.9]  | -9.5[-11.0,-8.0]                                                |
| Ukraine                  | 2012 | Europe                | LM                                 | No        | 0                | 99.0[98.1,99.9]  | 97.6[94.2,100.0] | 99.3[98.1,100.0] | 1.7[0.0,3.4]                                                    |
| Ukraine                  | 2007 | Europe                | LM                                 | No        | 0                | 98.7[97.8,99.6]  | 97.8[94.8,100.0] | 98.7[97.4,100.0] | 0.9[-0.8,2.6]                                                   |
| Ukraine                  | 2005 | Europe                | LM                                 | No        | 0                | 99.5[98.6,100.0] | 99.0[95.0,100.0] | 99.7[98.4,100.0] | 0.7[-1.3,2.7]                                                   |
| Uzbekistan               | 2006 | Europe                | L                                  | Yes       | 0                | 99.9[99.0,100.0] | 97.6[94.2,100.0] | 99.9[98.7,100.0] | 2.3[0.8,3.8]                                                    |
| Vanuatu                  | 2007 | Western Pacific       | LM                                 | No        | 0                | 74.0[73.3,74.7]  | 71.9[66.6,77.2]  | 76.9[75.6,78.2]  | 5.0[2.8,7.2]                                                    |
| Vietnam                  | 2013 | Western Pacific       | LM                                 | No        | 0                | 93.8[92.8,94.8]  | 85.9[81.3,90.5]  | 94.5[93.1,95.9]  | 8.6[6.6,10.6]                                                   |
| Vietnam                  | 2006 | Western Pacific       | L                                  | No        | 0                | 87.7[86.9,88.5]  | 70.0[64.8,75.2]  | 88.8[87.6,90.0]  | 18.8[16.9,20.7]                                                 |
| Vietnam                  | 2002 | Western Pacific       | L                                  | No        | 0                | 85.0[84.0,86.0]  | 73.0[68.0,78.0]  | 86.0[84.9,87.1]  | 13.0[11.3,14.7]                                                 |
| West Bank and Gaza Strip | 2014 | Eastern Mediterranean | LM                                 | No        | 0                | 99.6[99.2,100.0] | 98.4[96.8,100.0] | 99.8[99.2,100.0] | 1.4[0.5,2.3]                                                    |
| Yemen                    | 2013 | Eastern Mediterranean | LM                                 | Yes       | 0                | 46.2[45.7,46.6]  | 49.9[47.7,52.1]  | 44.9[44.0,45.8]  | -5.0[-6.2,-3.8]                                                 |
| Yemen                    | 2006 | Eastern Mediterranean | L                                  | Yes       | 0                | 36.0[35.0,37.0]  | 36.0[32.0,40.0]  | 36.0[34.6,37.4]  | 0.0[-1.9,1.9]                                                   |
| Zambia                   | 2013 | Africa                | LM                                 | Yes       | 1                | 65.7[65.0,66.5]  | 69.1[67.1,71.1]  | 64.6[63.5,65.7]  | -4.5[-5.8,-3.2]                                                 |
| Zambia                   | 2007 | Africa                | L                                  | Yes       | 1                | 48.2[47.2,49.3]  | 52.6[49.5,55.7]  | 46.8[45.2,48.4]  | -5.8[-7.8,-3.8]                                                 |
| Zambia                   | 2001 | Africa                | L                                  | Yes       | 1                | 44.3[43.3,45.3]  | 44.4[41.7,47.1]  | 44.3[42.8,45.8]  | -0.1[-2.0,1.8]                                                  |
| Zimbabwe                 | 2019 | Africa                | L                                  | Yes       | 1                | 86.0[85.0,87.0]  | 84.2[81.4,87.0]  | 86.2[84.7,87.7]  | 2.0[0.2,3.8]                                                    |
| Zimbabwe                 | 2015 | Africa                | L                                  | Yes       | 1                | 78.1[77.1,79.1]  | 76.2[73.5,78.9]  | 78.9[77.5,80.3]  | 2.7[1.0,4.4]                                                    |
| Zimbabwe                 | 2014 | Africa                | L                                  | Yes       | 1                | 80.0[79.0,81.0]  | 80.9[77.1,84.7]  | 79.8[78.2,81.4]  | -1.1[-3.2,1.0]                                                  |
| Zimbabwe                 | 2010 | Africa                | L                                  | Yes       | 1                | 66.2[65.2,67.2]  | 63.8[60.9,66.7]  | 67.1[65.7,68.5]  | 3.3[1.5,5.1]                                                    |
| Zimbabwe                 | 2005 | Africa                | L                                  | Yes       | 1                | 69.3[68.4,70.3]  | 67.7[64.8,70.6]  | 69.9[68.4,71.4]  | 2.2[0.3,4.1]                                                    |

**Appendix Table 7. Percentage of delivering in a health facility among adolescents 15-19 years old and adult mothers 20-34 years old<sup>1</sup>**

| Country     | Year | WHO region            | Income classification <sup>2</sup> | Countdown | SSA <sup>3</sup> | 15-34 (%)         | 15-19 (%)        | 20-34 (%)         | Absolute inequality between 20-34 and 15-19 (percentage points) |
|-------------|------|-----------------------|------------------------------------|-----------|------------------|-------------------|------------------|-------------------|-----------------------------------------------------------------|
| Afghanistan | 2015 | Eastern Mediterranean | L                                  | Yes       | 0                | 48.1[47.4,48.8]   | 47.3[45.4,49.2]  | 48.5[47.7,49.3]   | 1.2[0.2,2.2]                                                    |
| Afghanistan | 2010 | Eastern Mediterranean | L                                  | Yes       | 0                | 32.9[31.4,34.4]   | 32.7[28.8,36.6]  | 33.1[31.3,34.9]   | 0.4[-1.9,2.7]                                                   |
| Albania     | 2017 | Europe                | UM                                 | No        | 0                | 98.6[98.0,99.2]   | 98.8[97.1,100.0] | 98.5[97.8,99.2]   | -0.3[-1.1,0.5]                                                  |
| Albania     | 2008 | Europe                | LM                                 | No        | 0                | 96.7[96.1,97.3]   | 95.5[94.5,96.5]  | 96.9[96.0,97.8]   | 1.4[0.5,2.3]                                                    |
| Algeria     | 2012 | Africa                | UM                                 | Yes       | 0                | 96.8[96.5,97.1]   | 94.8[94.3,95.3]  | 97.1[96.8,97.4]   | 2.3[1.9,2.7]                                                    |
| Algeria     | 2006 | Africa                | LM                                 | Yes       | 0                | 95.3[94.2,96.4]   | 83.6[80.8,86.4]  | 96.4[95.0,97.8]   | 12.8[10.9,14.7]                                                 |
| Angola      | 2015 | Africa                | UM                                 | Yes       | 1                | 46.4[45.4,47.4]   | 46.4[44.3,48.5]  | 46.4[45.1,47.7]   | 0.0[-1.6,1.6]                                                   |
| Armenia     | 2015 | Europe                | LM                                 | No        | 0                | 99.3[98.2,100.0]  | 97.8[92.5,100.0] | 99.3[97.9,100.0]  | 1.5[-0.6,3.6]                                                   |
| Armenia     | 2010 | Europe                | LM                                 | No        | 0                | 99.4[99.1,99.7]   | 98.0[95.7,100.0] | 99.4[99.1,99.7]   | 1.4[0.6,2.2]                                                    |
| Armenia     | 2005 | Europe                | LM                                 | No        | 0                | 96.5[95.4,97.6]   | 98.4[95.1,100.0] | 96.0[94.9,97.1]   | -2.4[-3.8,-1.0]                                                 |
| Armenia     | 2000 | Europe                | L                                  | No        | 0                | 92.5[91.1,93.9]   | 85.6[81.5,89.7]  | 93.7[92.1,95.3]   | 8.1[6.1,10.1]                                                   |
| Azerbaijan  | 2006 | Europe                | LM                                 | Yes       | 0                | 77.7[75.8,79.6]   | 69.6[63.7,75.5]  | 78.7[76.6,80.8]   | 9.1[6.5,11.7]                                                   |
| Bangladesh  | 2014 | South-East Asia       | LM                                 | Yes       | 0                | 37.4[36.0,38.8]   | 35.1[32.7,37.5]  | 38.5[36.7,40.3]   | 3.4[1.4,5.4]                                                    |
| Bangladesh  | 2011 | South-East Asia       | L                                  | Yes       | 0                | 28.8[27.8,29.8]   | 28.0[26.2,29.8]  | 29.3[28.0,30.6]   | 1.3[-0.1,2.7]                                                   |
| Bangladesh  | 2007 | South-East Asia       | L                                  | Yes       | 0                | 14.6[13.6,15.6]   | 13.3[11.5,15.1]  | 15.2[13.8,16.6]   | 1.9[0.4,3.4]                                                    |
| Bangladesh  | 2006 | South-East Asia       | L                                  | Yes       | 0                | 16.0[14.0,18.0]   | 14.1[8.0,20.2]   | 17.2[14.9,19.5]   | 3.1[-0.1,6.3]                                                   |
| Bangladesh  | 2004 | South-East Asia       | L                                  | Yes       | 0                | 9.3[8.5,10.1]     | 7.8[6.3,9.3]     | 9.9[8.7,11.1]     | 2.1[0.8,3.4]                                                    |
| Belarus     | 2005 | Europe                | LM                                 | No        | 0                | 99.6[97.7,100.0]  | 99.0[93.5,100.0] | 99.8[97.5,100.0]  | 0.8[-2.1,3.7]                                                   |
| Belize      | 2015 | Americas              | UM                                 | No        | 0                | 100.0[99.6,100.0] | 99.0[96.7,100.0] | 100.0[99.3,100.0] | 1.0[-0.2,2.0]                                                   |
| Belize      | 2011 | Americas              | LM                                 | No        | 0                | 93.8[92.3,95.3]   | 94.9[90.7,99.1]  | 93.7[92.0,95.4]   | -1.2[-3.1,0.7]                                                  |
| Belize      | 2006 | Americas              | UM                                 | No        | 0                | 92.1[91.8,92.3]   | 93.5[93.0,94.0]  | 91.6[91.3,91.9]   | -1.9[-2.3,-1.5]                                                 |
| Benin       | 2018 | Africa                | L                                  | Yes       | 1                | 56.4[55.2,57.6]   | 59.6[56.5,62.7]  | 55.3[53.9,56.7]   | -4.3[-6.1,-2.5]                                                 |
| Benin       | 2014 | Africa                | L                                  | Yes       | 1                | 87.0[85.8,88.2]   | 85.6[81.1,90.1]  | 87.3[85.7,88.9]   | 1.7[-0.2,3.6]                                                   |
| Benin       | 2011 | Africa                | L                                  | Yes       | 1                | 86.9[86.2,87.6]   | 87.0[85.2,88.8]  | 86.8[86.0,87.6]   | -0.2[-1.2,0.8]                                                  |
| Benin       | 2006 | Africa                | L                                  | Yes       | 1                | 78.1[77.3,78.9]   | 74.3[72.1,76.5]  | 79.1[78.2,80.0]   | 4.8[3.6,6.0]                                                    |
| Benin       | 2001 | Africa                | L                                  | Yes       | 1                | 76.0[74.6,77.4]   | 75.8[72.2,79.4]  | 76.4[74.8,78.0]   | 0.6[-1.5,2.7]                                                   |

**Note:**

1. We mark the countries with absolute inequality (difference) between mothers 20-34 and 15-19 years old larger than 5 percentage points in orange.
2. Income classification: “L” represents “low-income country”; “LM” represents “lower-middle-income country”; “UM” represents “upper-middle-income country”.
3. SSA: “1” represents “Sub-Saharan African country”; “0” represents “Not a Sub-Saharan African country”.

**Appendix Table 7. Percentage of delivering in a health facility among adolescents 15-19 years old and adult mothers 20-34 years old<sup>1</sup> (continued)**

| Country                  | Year | WHO region      | Income classification <sup>2</sup> | Countdown | SSA <sup>3</sup> | 15-34 (%)        | 15-19 (%)        | 20-34 (%)        | Absolute inequality between 20-34 and 15-19 (percentage points) |
|--------------------------|------|-----------------|------------------------------------|-----------|------------------|------------------|------------------|------------------|-----------------------------------------------------------------|
| Bhutan                   | 2010 | South-East Asia | LM                                 | Yes       | 0                | 63.1[62.3,63.9]  | 56.2[53.6,58.8]  | 65.1[64.2,66.0]  | 8.9[7.7,10.1]                                                   |
| Bolivia                  | 2008 | Americas        | LM                                 | Yes       | 0                | 69.6[68.5,70.7]  | 71.1[68.6,73.6]  | 69.1[67.8,70.4]  | -2.0[-3.6,-0.4]                                                 |
| Bolivia                  | 2003 | Americas        | LM                                 | Yes       | 0                | 59.7[58.5,60.8]  | 65.8[63.4,68.2]  | 57.6[56.3,58.9]  | -8.2[-9.8,-6.6]                                                 |
| Bosnia and Herzegovina   | 2006 | Europe          | LM                                 | No        | 0                | 99.4[98.3,100.0] | 99.0[95.7,100.0] | 99.5[98.2,100.0] | 0.5[-1.1,2.1]                                                   |
| Burkina Faso             | 2010 | Africa          | L                                  | Yes       | 1                | 66.8[65.9,67.6]  | 67.5[65.5,69.5]  | 66.5[65.5,67.5]  | -1.0[-2.3,0.3]                                                  |
| Burkina Faso             | 2006 | Africa          | L                                  | Yes       | 1                | 54.2[53.2,55.2]  | 58.1[56.0,60.2]  | 52.9[51.6,54.2]  | -5.2[-6.7,-3.7]                                                 |
| Burkina Faso             | 2003 | Africa          | L                                  | Yes       | 1                | 39.0[37.9,40.1]  | 38.7[35.9,41.5]  | 39.1[37.7,40.5]  | 0.4[-1.4,2.2]                                                   |
| Burundi                  | 2016 | Africa          | L                                  | Yes       | 1                | 85.6[84.8,86.4]  | 87.9[85.6,90.2]  | 84.8[83.8,85.8]  | -3.1[-4.3,-1.9]                                                 |
| Burundi                  | 2010 | Africa          | L                                  | Yes       | 1                | 62.5[61.1,63.8]  | 69.2[65.5,72.9]  | 60.2[58.6,61.8]  | -9.0[-11.0,-7.0]                                                |
| Burundi                  | 2005 | Africa          | L                                  | Yes       | 1                | 39.5[38.7,40.4]  | 38.8[36.7,40.9]  | 39.8[38.8,40.8]  | 1.0[-0.3,2.3]                                                   |
| Cambodia                 | 2014 | Western Pacific | L                                  | Yes       | 0                | 83.2[82.2,84.2]  | 82.3[79.5,85.1]  | 84.5[83.4,85.6]  | 2.2[0.8,3.6]                                                    |
| Cambodia                 | 2010 | Western Pacific | L                                  | Yes       | 0                | 55.2[54.0,56.4]  | 56.4[52.7,60.1]  | 54.8[53.4,56.2]  | -1.6[-3.4,0.2]                                                  |
| Cambodia                 | 2005 | Western Pacific | L                                  | Yes       | 0                | 21.5[20.5,22.5]  | 20.8[17.8,23.8]  | 22.4[21.2,23.6]  | 1.6[0.1,3.1]                                                    |
| Cambodia                 | 2000 | Western Pacific | L                                  | Yes       | 0                | 10.6[9.9,11.4]   | 10.5[7.9,13.1]   | 10.7[9.8,11.6]   | 0.2[-1.0,1.4]                                                   |
| Cameroon                 | 2014 | Africa          | LM                                 | Yes       | 1                | 61.1[59.8,62.4]  | 60.7[57.6,63.8]  | 61.2[59.5,62.9]  | 0.5[-1.8,2.8]                                                   |
| Cameroon                 | 2011 | Africa          | LM                                 | Yes       | 1                | 61.2[60.1,62.3]  | 56.7[54.3,59.1]  | 62.7[61.3,64.1]  | 6.0[4.3,7.7]                                                    |
| Cameroon                 | 2006 | Africa          | LM                                 | Yes       | 1                | 42.2[41.1,43.3]  | 40.0[37.8,42.2]  | 42.9[41.5,44.3]  | 2.9[1.3,4.5]                                                    |
| Cameroon                 | 2004 | Africa          | L                                  | Yes       | 1                | 59.0[57.7,60.3]  | 56.9[54.2,59.6]  | 59.7[58.0,61.4]  | 2.8[0.8,4.8]                                                    |
| Central African Republic | 2010 | Africa          | L                                  | Yes       | 1                | 52.5[51.2,53.8]  | 50.8[47.2,54.4]  | 53.7[52.1,55.3]  | 2.9[0.8,5.0]                                                    |
| Central African Republic | 2006 | Africa          | L                                  | Yes       | 1                | 51.0[49.7,52.3]  | 54.8[52.3,57.3]  | 48.8[47.1,50.5]  | -6.0[-7.9,-4.1]                                                 |
| Chad                     | 2014 | Africa          | L                                  | Yes       | 1                | 21.7[20.9,22.5]  | 22.1[20.4,23.8]  | 21.3[20.4,22.2]  | -0.8[-1.9,0.3]                                                  |
| Chad                     | 2010 | Africa          | L                                  | Yes       | 1                | 15.8[14.7,16.9]  | 19.2[16.2,22.2]  | 14.8[13.5,16.1]  | -4.4[-6.2,-2.6]                                                 |
| Chad                     | 2004 | Africa          | L                                  | Yes       | 1                | 13.2[12.1,14.3]  | 14.4[11.4,17.4]  | 12.6[10.9,14.3]  | -1.8[-3.9,0.3]                                                  |
| Colombia                 | 2015 | Americas        | UM                                 | No        | 0                | 96.9[96.1,97.7]  | 95.0[92.9,97.1]  | 97.3[96.2,98.4]  | 2.3[1.0,3.6]                                                    |
| Comoros                  | 2012 | Africa          | L                                  | Yes       | 1                | 76.1[74.1,78.1]  | 71.0[65.5,76.5]  | 77.4[75.1,79.7]  | 6.4[3.3,9.5]                                                    |
| Congo                    | 2014 | Africa          | LM                                 | Yes       | 1                | 91.5[90.3,92.7]  | 89.6[86.9,92.3]  | 92.7[91.3,94.1]  | 3.1[1.4,4.8]                                                    |
| Congo                    | 2011 | Africa          | LM                                 | Yes       | 1                | 91.5[90.9,92.1]  | 91.4[89.7,93.1]  | 91.5[90.4,92.6]  | 0.1[-1.1,1.3]                                                   |
| Congo                    | 2005 | Africa          | LM                                 | Yes       | 1                | 82.2[81.0,83.4]  | 84.5[82.1,86.9]  | 82.1[80.7,83.5]  | -2.4[-4.1,-0.7]                                                 |
| Costa Rica               | 2011 | Americas        | UM                                 | No        | 0                | 98.1[97.3,98.9]  | 93.9[91.9,95.9]  | 98.6[97.6,99.6]  | 4.7[3.5,5.9]                                                    |

**Appendix Table 7. Percentage of delivering in a health facility among adolescents 15-19 years old and adult mothers 20-34 years old<sup>1</sup> (continued)**

| Country                          | Year | WHO region            | Income classification <sup>2</sup> | Countdown | SSA <sup>3</sup> | 15-34 (%)       | 15-19 (%)        | 20-34 (%)        | Absolute inequality between 20-34 and 15-19 (percentage points) |
|----------------------------------|------|-----------------------|------------------------------------|-----------|------------------|-----------------|------------------|------------------|-----------------------------------------------------------------|
| Cuba                             | 2014 | Americas              | UM                                 | No        | 0                | 99.0[98.2,99.8] | 95.8[93.7,97.9]  | 99.4[98.4,100.0] | 3.6[2.3,4.9]                                                    |
| Côte d'Ivoire                    | 2016 | Africa                | LM                                 | Yes       | 1                | 69.8[68.5,71.1] | 71.1[68.0,74.2]  | 68.7[67.2,70.2]  | -2.4[-4.3,-0.5]                                                 |
| Côte d'Ivoire                    | 2011 | Africa                | LM                                 | Yes       | 1                | 57.4[56.1,58.7] | 55.3[52.2,58.4]  | 58.0[56.4,59.6]  | 2.7[0.7,4.7]                                                    |
| Côte d'Ivoire                    | 2006 | Africa                | L                                  | Yes       | 1                | 53.8[52.8,54.8] | 57.1[54.9,59.3]  | 52.0[50.9,53.1]  | -5.1[-6.5,-3.7]                                                 |
| Democratic Republic of the Congo | 2013 | Africa                | L                                  | Yes       | 1                | 80.1[79.4,80.9] | 80.0[78.2,81.8]  | 80.2[79.2,81.2]  | 0.2[-1.0,1.4]                                                   |
| Democratic Republic of the Congo | 2010 | Africa                | L                                  | Yes       | 1                | 74.9[72.6,77.2] | 73.9[67.8,80.0]  | 75.5[73.0,78.0]  | 1.6[-1.3,4.5]                                                   |
| Democratic Republic of the Congo | 2007 | Africa                | L                                  | Yes       | 1                | 70.1[68.9,71.3] | 70.5[67.7,73.3]  | 70.1[68.7,71.5]  | -0.4[-2.2,1.4]                                                  |
| Dominican Republic               | 2014 | Americas              | UM                                 | Yes       | 0                | 97.6[97.3,97.8] | 97.7[97.2,98.2]  | 97.5[97.1,97.9]  | -0.2[-0.6,0.2]                                                  |
| Dominican Republic               | 2013 | Americas              | UM                                 | Yes       | 0                | 98.2[97.8,98.6] | 97.5[96.6,98.4]  | 98.4[97.7,99.1]  | 0.9[0.2,1.6]                                                    |
| Dominican Republic               | 2007 | Americas              | LM                                 | Yes       | 0                | 97.2[97.0,97.5] | 97.3[96.7,97.9]  | 97.2[96.8,97.6]  | -0.1[-0.5,0.3]                                                  |
| Dominican Republic               | 2002 | Americas              | LM                                 | Yes       | 0                | 97.9[97.6,98.2] | 97.5[97.0,98.0]  | 97.9[97.5,98.3]  | 0.4[-0.0,0.8]                                                   |
| Egypt                            | 2008 | Eastern Mediterranean | LM                                 | No        | 0                | 71.7[70.7,72.7] | 68.8[65.8,71.8]  | 71.8[70.7,72.9]  | 3.0[1.6,4.4]                                                    |
| Egypt                            | 2005 | Eastern Mediterranean | LM                                 | No        | 0                | 64.6[63.6,65.6] | 58.3[55.3,61.3]  | 65.5[64.4,66.6]  | 7.2[5.8,8.6]                                                    |
| Egypt                            | 2000 | Eastern Mediterranean | LM                                 | No        | 0                | 48.2[47.1,49.3] | 43.3[39.9,46.7]  | 48.8[47.6,50.0]  | 5.5[3.9,7.1]                                                    |
| El Salvador                      | 2014 | Americas              | LM                                 | No        | 0                | 97.5[96.1,98.9] | 98.2[93.9,100.0] | 97.3[95.7,98.9]  | -0.9[-3.0,1.2]                                                  |
| Ethiopia                         | 2016 | Africa                | L                                  | Yes       | 1                | 27.4[26.3,28.5] | 30.4[27.4,33.4]  | 26.4[25.1,27.7]  | -4.0[-5.7,-2.3]                                                 |
| Ethiopia                         | 2011 | Africa                | L                                  | Yes       | 1                | 9.9[9.2,10.6]   | 8.6[6.5,10.7]    | 10.7[9.7,11.7]   | 2.1[0.8,3.4]                                                    |
| Ethiopia                         | 2005 | Africa                | L                                  | Yes       | 1                | 5.3[4.7,5.9]    | 5.3[3.2,7.4]     | 5.4[4.4,6.4]     | 0.1[-1.2,1.4]                                                   |
| Ethiopia                         | 2000 | Africa                | L                                  | Yes       | 1                | 5.0[4.5,5.5]    | 4.2[2.2,6.2]     | 5.4[4.5,6.3]     | 1.2[0.0,2.4]                                                    |
| Gabon                            | 2012 | Africa                | UM                                 | Yes       | 1                | 90.2[88.8,91.6] | 88.0[85.4,90.6]  | 90.9[89.2,92.6]  | 2.9[0.9,4.9]                                                    |
| Gabon                            | 2000 | Africa                | UM                                 | Yes       | 1                | 84.8[83.3,86.3] | 86.6[84.1,89.1]  | 84.3[82.3,86.3]  | -2.3[-4.5,-0.1]                                                 |
| Gambia                           | 2018 | Africa                | L                                  | Yes       | 1                | 81.5[79.5,83.5] | 84.1[78.6,89.6]  | 81.1[78.6,83.6]  | -3.0[-6.6,0.6]                                                  |
| Gambia                           | 2013 | Africa                | L                                  | Yes       | 1                | 62.6[61.3,63.9] | 66.9[63.7,70.1]  | 61.7[60.1,63.3]  | -5.2[-7.2,-3.2]                                                 |
| Gambia                           | 2010 | Africa                | L                                  | Yes       | 1                | 55.7[54.4,57.0] | 62.0[58.8,65.2]  | 54.9[53.3,56.5]  | -7.1[-9.0,-5.2]                                                 |
| Gambia                           | 2005 | Africa                | L                                  | Yes       | 1                | 54.5[53.2,55.8] | 59.0[55.8,62.2]  | 53.8[52.2,55.4]  | -5.2[-7.0,-3.4]                                                 |
| Georgia                          | 2005 | Europe                | LM                                 | No        | 0                | 95.5[93.6,97.4] | 92.3[86.2,98.4]  | 96.0[93.7,98.3]  | 3.7[0.9,6.5]                                                    |
| Ghana                            | 2014 | Africa                | LM                                 | Yes       | 1                | 73.1[71.8,74.4] | 70.3[66.4,74.2]  | 74.0[72.4,75.6]  | 3.7[1.6,5.8]                                                    |
| Ghana                            | 2011 | Africa                | LM                                 | Yes       | 1                | 69.3[68.0,70.7] | 69.8[65.9,73.7]  | 69.2[67.6,70.8]  | -0.6[-2.8,1.6]                                                  |
| Ghana                            | 2008 | Africa                | L                                  | Yes       | 1                | 57.1[55.0,59.2] | 49.9[43.8,56.0]  | 58.9[56.4,61.4]  | 9.0[5.7,12.3]                                                   |
| Ghana                            | 2006 | Africa                | L                                  | Yes       | 1                | 48.7[47.7,49.7] | 40.7[38.3,43.1]  | 49.0[47.9,50.1]  | 8.3[6.8,9.8]                                                    |
| Ghana                            | 2003 | Africa                | L                                  | Yes       | 1                | 45.7[43.8,47.6] | 45.6[40.4,50.8]  | 46.2[43.9,48.5]  | 0.6[-2.4,3.6]                                                   |

**Appendix Table 7. Percentage of delivering in a health facility among adolescents 15-19 years old and adult mothers 20-34 years old<sup>1</sup> (continued)**

| Country       | Year | WHO region            | Income classification <sup>2</sup> | Countdown | SSA <sup>3</sup> | 15-34 (%)       | 15-19 (%)       | 20-34 (%)       | Absolute inequality between 20-34 and 15-19 (percentage points) |
|---------------|------|-----------------------|------------------------------------|-----------|------------------|-----------------|-----------------|-----------------|-----------------------------------------------------------------|
| Guatemala     | 2014 | Americas              | LM                                 | Yes       | 0                | 66.2[65.3,67.2] | 66.4[64.4,68.4] | 66.2[65.0,67.4] | -0.2[-1.6,1.2]                                                  |
| Guinea        | 2018 | Africa                | L                                  | Yes       | 1                | 53.3[51.9,54.6] | 54.7[51.4,58.0] | 52.8[51.1,54.5] | -1.9[-4.2,0.4]                                                  |
| Guinea        | 2016 | Africa                | L                                  | Yes       | 1                | 57.2[56.5,57.9] | 54.2[52.2,56.2] | 59.0[58.2,59.8] | 4.8[3.6,6.0]                                                    |
| Guinea        | 2012 | Africa                | L                                  | Yes       | 1                | 40.3[38.9,41.7] | 40.1[37.2,43.0] | 40.9[39.2,42.6] | 0.8[-1.3,2.9]                                                   |
| Guinea        | 2005 | Africa                | L                                  | Yes       | 1                | 30.8[29.4,32.2] | 34.6[31.3,37.9] | 30.7[29.0,32.4] | -3.9[-6.0,-1.8]                                                 |
| Guinea-Bissau | 2014 | Africa                | L                                  | Yes       | 1                | 46.0[44.2,47.8] | 51.8[48.4,55.2] | 44.1[41.8,46.4] | -7.7[-10.1,-5.3]                                                |
| Guinea-Bissau | 2010 | Africa                | L                                  | Yes       | 1                | 41.4[39.6,43.2] | 48.9[45.5,52.3] | 40.7[38.4,43.0] | -8.2[-10.7,-5.7]                                                |
| Guinea-Bissau | 2006 | Africa                | L                                  | Yes       | 1                | 35.9[34.1,37.7] | 42.5[39.1,45.9] | 35.0[32.7,37.3] | -7.5[-9.9,-5.1]                                                 |
| Guyana        | 2014 | Americas              | LM                                 | Yes       | 0                | 93.2[91.9,94.6] | 94.3[91.1,97.5] | 92.9[91.2,94.6] | -1.4[-3.3,0.5]                                                  |
| Guyana        | 2009 | Americas              | LM                                 | Yes       | 0                | 89.0[87.6,90.4] | 88.8[85.2,92.4] | 89.5[87.2,91.8] | 0.7[-1.9,3.3]                                                   |
| Guyana        | 2006 | Americas              | LM                                 | Yes       | 0                | 82.6[81.1,84.1] | 83.7[80.1,87.3] | 82.4[80.6,84.2] | -1.3[-3.4,0.8]                                                  |
| Haiti         | 2016 | Americas              | L                                  | Yes       | 0                | 39.4[38.2,40.6] | 38.4[34.6,42.2] | 41.2[39.7,42.7] | 2.8[1.0,4.6]                                                    |
| Haiti         | 2012 | Americas              | L                                  | Yes       | 0                | 37.3[36.0,38.6] | 38.2[35.0,41.4] | 37.0[35.4,38.6] | -1.2[-3.2,0.8]                                                  |
| Haiti         | 2006 | Americas              | L                                  | Yes       | 0                | 26.1[24.8,27.4] | 26.4[22.0,30.8] | 26.0[24.4,27.6] | -0.4[-2.6,1.8]                                                  |
| Haiti         | 2000 | Americas              | L                                  | Yes       | 0                | 23.2[22.1,24.3] | 27.8[24.5,31.1] | 23.1[21.7,24.5] | -4.7[-6.6,-2.8]                                                 |
| Honduras      | 2011 | Americas              | LM                                 | Yes       | 0                | 83.3[82.5,84.2] | 84.4[82.8,86.0] | 83.0[81.9,84.1] | -1.4[-2.6,-0.2]                                                 |
| Honduras      | 2006 | Americas              | LM                                 | Yes       | 0                | 67.4[67.1,67.7] | 69.5[68.9,70.1] | 66.7[66.3,67.1] | -2.8[-3.2,-2.4]                                                 |
| India         | 2015 | South-East Asia       | LM                                 | Yes       | 0                | 79.6[79.4,79.8] | 80.4[79.9,80.9] | 79.3[79.1,79.5] | -1.1[-1.4,-0.8]                                                 |
| India         | 2006 | South-East Asia       | L                                  | Yes       | 0                | 38.7[37.9,39.5] | 37.0[35.3,38.7] | 39.8[39.0,40.6] | 2.8[1.8,3.8]                                                    |
| Indonesia     | 2012 | South-East Asia       | LM                                 | Yes       | 0                | 63.2[62.5,63.9] | 52.4[50.4,54.4] | 64.4[63.5,65.3] | 12.0[10.9,13.1]                                                 |
| Indonesia     | 2007 | South-East Asia       | LM                                 | Yes       | 0                | 46.1[45.5,46.7] | 34.8[33.2,36.4] | 47.4[46.7,48.1] | 12.6[11.7,13.5]                                                 |
| Indonesia     | 2002 | South-East Asia       | L                                  | Yes       | 0                | 39.7[39.0,40.4] | 28.5[26.9,30.1] | 42.6[41.8,43.4] | 14.1[13.1,15.1]                                                 |
| Iraq          | 2018 | Eastern Mediterranean | UM                                 | Yes       | 0                | 87.1[86.3,87.9] | 88.3[86.2,90.4] | 86.7[85.8,87.6] | -1.6[-2.8,-0.4]                                                 |
| Iraq          | 2011 | Eastern Mediterranean | LM                                 | Yes       | 0                | 76.6[75.2,78.0] | 79.9[76.7,83.1] | 76.1[74.4,77.8] | -3.8[-5.8,-1.8]                                                 |
| Iraq          | 2006 | Eastern Mediterranean | LM                                 | Yes       | 0                | 62.6[61.2,64.0] | 69.3[65.7,72.9] | 62.5[60.9,64.1] | -6.8[-8.8,-4.8]                                                 |
| Jamaica       | 2011 | Americas              | UM                                 | Yes       | 0                | 98.6[97.8,99.4] | 96.3[93.9,98.7] | 98.8[98.0,99.6] | 2.5[1.2,3.8]                                                    |
| Jamaica       | 2005 | Americas              | LM                                 | Yes       | 0                | 94.4[93.4,95.4] | 94.3[91.3,97.3] | 95.5[94.3,96.7] | 1.2[-0.5,2.9]                                                   |
| Jordan        | 2018 | Eastern Mediterranean | LM                                 | No        | 0                | 97.5[96.2,98.8] | 96.0[92.2,99.8] | 98.0[96.6,99.4] | 2.0[0.3,3.7]                                                    |
| Jordan        | 2012 | Eastern Mediterranean | UM                                 | No        | 0                | 98.8[98.5,99.1] | 96.5[95.0,98.0] | 98.9[98.6,99.2] | 2.4[2.0,2.8]                                                    |
| Jordan        | 2007 | Eastern Mediterranean | LM                                 | No        | 0                | 63.8[63.5,64.1] | 59.5[57.8,61.2] | 63.8[63.5,64.1] | 4.3[3.8,4.8]                                                    |
| Jordan        | 2002 | Eastern Mediterranean | LM                                 | No        | 0                | 96.4[95.9,96.9] | 95.5[93.3,97.7] | 96.7[96.0,97.4] | 1.2[0.4,2.0]                                                    |

**Appendix Table 7. Percentage of delivering in a health facility among adolescents 15-19 years old and adult mothers 20-34 years old<sup>1</sup> (continued)**

| Country                          | Year | WHO region            | Income classification <sup>2</sup> | Countdown | SSA <sup>3</sup> | 15-34 (%)        | 15-19 (%)        | 20-34 (%)        | Absolute inequality between 20-34 and 15-19 (percentage points) |
|----------------------------------|------|-----------------------|------------------------------------|-----------|------------------|------------------|------------------|------------------|-----------------------------------------------------------------|
| Kazakhstan                       | 2015 | Europe                | UM                                 | No        | 0                | 99.3[98.7,99.9]  | 98.3[96.1,100.0] | 99.4[98.4,100.0] | 1.1[-0.1,2.3]                                                   |
| Kazakhstan                       | 2010 | Europe                | UM                                 | No        | 0                | 99.4[98.8,100.0] | 99.0[98.0,100.0] | 99.5[98.5,100.0] | 0.5[-0.5,1.5]                                                   |
| Kazakhstan                       | 2006 | Europe                | UM                                 | No        | 0                | 99.5[99.3,99.8]  | 99.0[97.5,100.0] | 99.7[99.4,100.0] | 0.7[0.2,1.2]                                                    |
| Kenya                            | 2014 | Africa                | LM                                 | Yes       | 1                | 61.2[60.4,62.0]  | 60.7[58.7,62.7]  | 62.5[61.6,63.4]  | 1.8[0.6,3.0]                                                    |
| Kenya                            | 2008 | Africa                | L                                  | Yes       | 1                | 43.4[41.9,44.9]  | 45.6[42.0,49.2]  | 42.7[40.9,44.5]  | -2.9[-5.1,-0.7]                                                 |
| Kenya                            | 2003 | Africa                | L                                  | Yes       | 1                | 41.8[40.2,43.3]  | 44.7[41.1,48.3]  | 40.8[38.9,42.7]  | -3.9[-6.2,-1.6]                                                 |
| Kyrgyzstan                       | 2018 | Europe                | LM                                 | Yes       | 0                | 99.6[98.5,100.0] | 99.0[96.2,100.0] | 99.7[98.4,100.0] | 0.7[-0.9,2.3]                                                   |
| Kyrgyzstan                       | 2014 | Europe                | LM                                 | Yes       | 0                | 98.3[97.2,99.4]  | 96.5[94.0,99.0]  | 98.6[97.3,99.9]  | 2.1[0.5,3.7]                                                    |
| Kyrgyzstan                       | 2012 | Europe                | L                                  | Yes       | 0                | 98.7[98.4,98.9]  | 98.2[98.2,98.2]  | 98.8[98.5,99.1]  | 0.6[0.3,0.9]                                                    |
| Kyrgyzstan                       | 2005 | Europe                | L                                  | Yes       | 0                | 96.9[95.5,98.3]  | 94.6[91.0,98.2]  | 97.1[95.4,98.8]  | 2.5[0.7,4.3]                                                    |
| Lao People's Democratic Republic | 2017 | Western Pacific       | LM                                 | Yes       | 0                | 64.5[63.2,65.8]  | 56.0[51.6,60.4]  | 67.1[65.6,68.6]  | 11.1[9.1,13.1]                                                  |
| Lao People's Democratic Republic | 2011 | Western Pacific       | LM                                 | Yes       | 0                | 37.5[36.2,38.8]  | 36.3[31.9,40.7]  | 38.8[37.4,40.2]  | 2.5[0.6,4.4]                                                    |
| Lao People's Democratic Republic | 2006 | Western Pacific       | L                                  | Yes       | 0                | 17.1[15.9,18.3]  | 17.1[13.7,20.5]  | 17.8[16.4,19.2]  | 0.7[-0.9,2.3]                                                   |
| Lebanon                          | 2011 | Eastern Mediterranean | UM                                 | No        | 0                | 98.6[98.2,99.0]  | 95.1[94.2,96.0]  | 99.3[98.6,100.0] | 4.2[3.5,4.9]                                                    |
| Lebanon                          | 2005 | Eastern Mediterranean | UM                                 | No        | 0                | 97.7[96.6,98.8]  | 93.6[90.8,96.4]  | 98.0[96.7,99.3]  | 4.4[2.7,6.1]                                                    |
| Lesotho                          | 2018 | Africa                | LM                                 | Yes       | 1                | 90.8[89.6,92.1]  | 93.4[91.4,95.4]  | 90.0[88.4,91.6]  | -3.4[-5.1,-1.7]                                                 |
| Lesotho                          | 2014 | Africa                | LM                                 | Yes       | 1                | 77.4[75.6,79.3]  | 79.6[75.7,83.5]  | 76.7[74.4,79.0]  | -2.9[-5.6,-0.2]                                                 |
| Lesotho                          | 2009 | Africa                | LM                                 | Yes       | 1                | 59.7[58.0,61.5]  | 61.3[57.7,64.9]  | 59.2[57.0,61.4]  | -2.1[-4.7,0.5]                                                  |
| Lesotho                          | 2004 | Africa                | L                                  | Yes       | 1                | 53.4[51.6,55.2]  | 55.4[51.6,59.2]  | 52.7[50.4,55.0]  | -2.7[-5.4,0.0]                                                  |
| Liberia                          | 2013 | Africa                | L                                  | Yes       | 1                | 55.8[54.5,57.1]  | 59.1[56.3,61.9]  | 54.3[52.6,56.0]  | -4.8[-6.8,-2.8]                                                 |
| Liberia                          | 2007 | Africa                | L                                  | Yes       | 1                | 36.9[35.4,38.4]  | 36.5[33.1,39.9]  | 36.9[35.0,38.8]  | 0.4[-2.0,2.8]                                                   |
| Madagascar                       | 2008 | Africa                | L                                  | Yes       | 1                | 35.3[34.3,36.3]  | 31.5[29.4,33.6]  | 35.9[34.6,37.2]  | 4.4[2.9,5.9]                                                    |
| Madagascar                       | 2003 | Africa                | L                                  | Yes       | 1                | 31.8[30.3,33.3]  | 27.9[24.4,31.4]  | 33.2[31.2,35.2]  | 5.3[2.9,7.7]                                                    |
| Malawi                           | 2015 | Africa                | L                                  | Yes       | 1                | 91.7[91.2,92.3]  | 92.1[91.1,93.1]  | 91.6[90.9,92.3]  | -0.5[-1.3,0.3]                                                  |
| Malawi                           | 2013 | Africa                | L                                  | Yes       | 1                | 89.8[89.0,90.5]  | 91.2[89.5,92.9]  | 89.3[88.4,90.2]  | -1.9[-3.0,-0.8]                                                 |
| Malawi                           | 2010 | Africa                | L                                  | Yes       | 1                | 73.8[73.1,74.6]  | 75.2[73.5,76.9]  | 73.4[72.5,74.3]  | -1.8[-2.9,-0.7]                                                 |
| Malawi                           | 2006 | Africa                | L                                  | Yes       | 1                | 53.8[52.7,54.9]  | 59.3[57.0,61.6]  | 53.3[52.0,54.6]  | -6.0[-7.5,-4.5]                                                 |
| Malawi                           | 2004 | Africa                | L                                  | Yes       | 1                | 57.2[56.1,58.3]  | 55.9[53.5,58.3]  | 58.3[56.9,59.7]  | 2.4[0.7,4.1]                                                    |
| Malawi                           | 2000 | Africa                | L                                  | Yes       | 1                | 55.4[54.3,56.5]  | 56.9[54.6,59.2]  | 55.4[54.0,56.8]  | -1.5[-3.2,0.2]                                                  |

**Appendix Table 7. Percentage of delivering in a health facility among adolescents 15-19 years old and adult mothers 20-34 years old<sup>1</sup> (continued)**

| Country    | Year | WHO region            | Income classification <sup>2</sup> | Countdown | SSA <sup>3</sup> | 15-34 (%)        | 15-19 (%)        | 20-34 (%)        | Absolute inequality between 20-34 and 15-19 (percentage points) |
|------------|------|-----------------------|------------------------------------|-----------|------------------|------------------|------------------|------------------|-----------------------------------------------------------------|
| Maldives   | 2017 | South-East Asia       | UM                                 | No        | 0                | 94.5[93.9,95.1]  | 96.5[94.9,98.1]  | 94.0[93.3,94.7]  | -2.5[-3.4,-1.6]                                                 |
| Maldives   | 2009 | South-East Asia       | LM                                 | No        | 0                | 95.1[94.4,95.8]  | 91.3[89.2,93.4]  | 95.9[95.2,96.6]  | 4.6[3.7,5.5]                                                    |
| Mali       | 2018 | Africa                | L                                  | Yes       | 1                | 66.8[66.0,67.6]  | 69.7[68.7,70.7]  | 66.5[65.6,67.4]  | -3.2[-4.1,-2.3]                                                 |
| Mali       | 2015 | Africa                | L                                  | Yes       | 1                | 64.5[63.6,65.4]  | 62.8[60.7,64.9]  | 65.5[64.4,66.6]  | 2.7[1.3,4.1]                                                    |
| Mali       | 2012 | Africa                | L                                  | Yes       | 1                | 55.0[53.8,56.2]  | 58.0[55.4,60.6]  | 54.5[53.1,55.9]  | -3.5[-5.3,-1.7]                                                 |
| Mali       | 2009 | Africa                | L                                  | Yes       | 1                | 55.5[54.5,56.5]  | 59.4[57.3,61.5]  | 54.6[53.3,55.9]  | -4.8[-6.4,-3.2]                                                 |
| Mali       | 2006 | Africa                | L                                  | Yes       | 1                | 45.1[44.1,46.1]  | 47.6[45.4,49.8]  | 44.8[43.5,46.1]  | -2.8[-4.4,-1.2]                                                 |
| Mali       | 2001 | Africa                | L                                  | Yes       | 1                | 37.8[36.9,38.7]  | 39.8[37.7,41.9]  | 37.3[36.2,38.4]  | -2.5[-3.9,-1.1]                                                 |
| Mauritania | 2015 | Africa                | LM                                 | Yes       | 1                | 69.3[68.1,70.5]  | 67.8[65.1,70.5]  | 70.3[68.9,71.7]  | 2.5[0.7,4.3]                                                    |
| Mauritania | 2011 | Africa                | L                                  | Yes       | 1                | 64.5[63.0,66.0]  | 60.7[57.0,64.4]  | 66.9[65.0,68.8]  | 6.2[3.8,8.6]                                                    |
| Mauritania | 2007 | Africa                | L                                  | Yes       | 1                | 50.4[48.8,51.9]  | 53.3[49.7,56.9]  | 49.4[47.5,51.3]  | -3.9[-6.3,-1.5]                                                 |
| Mexico     | 2015 | Americas              | UM                                 | No        | 0                | 96.9[96.1,97.7]  | 97.3[95.2,99.4]  | 96.6[95.5,97.7]  | -0.7[-2.0,0.6]                                                  |
| Moldova    | 2012 | Europe                | LM                                 | No        | 0                | 99.0[98.4,99.6]  | 99.0[96.8,100.0] | 99.0[98.1,99.9]  | 0.0[-1.1,1.1]                                                   |
| Moldova    | 2005 | Europe                | LM                                 | No        | 0                | 98.8[98.2,99.3]  | 99.0[98.0,100.0] | 98.7[98.1,99.3]  | -0.3[-0.9,0.3]                                                  |
| Mongolia   | 2018 | Western Pacific       | LM                                 | No        | 0                | 98.4[97.8,99.0]  | 99.0[96.9,100.0] | 98.0[97.4,98.6]  | -1.0[-1.8,-0.2]                                                 |
| Mongolia   | 2013 | Western Pacific       | LM                                 | No        | 0                | 98.4[97.1,99.7]  | 97.8[94.6,100.0] | 98.5[97.0,100.0] | 0.7[-1.1,2.5]                                                   |
| Mongolia   | 2010 | Western Pacific       | LM                                 | No        | 0                | 98.5[97.2,99.8]  | 97.4[94.0,100.0] | 98.5[97.1,99.9]  | 1.1[-0.5,2.7]                                                   |
| Mongolia   | 2005 | Western Pacific       | L                                  | No        | 0                | 98.6[97.1,100.0] | 97.6[94.5,100.0] | 98.7[97.0,100.0] | 1.1[-0.9,3.1]                                                   |
| Montenegro | 2018 | Europe                | UM                                 | No        | 0                | 98.1[96.9,99.2]  | 97.0[93.8,100.0] | 98.4[97.1,99.7]  | 1.4[-0.1,2.9]                                                   |
| Morocco    | 2003 | Eastern Mediterranean | LM                                 | Yes       | 0                | 60.8[59.4,62.2]  | 63.5[59.1,67.9]  | 60.3[58.7,61.9]  | -3.2[-5.3,-1.1]                                                 |
| Mozambique | 2011 | Africa                | L                                  | Yes       | 1                | 56.5[55.4,57.6]  | 60.3[58.0,62.6]  | 55.2[53.8,56.6]  | -5.1[-6.7,-3.5]                                                 |
| Mozambique | 2008 | Africa                | L                                  | Yes       | 1                | 58.0[55.9,60.1]  | 65.0[58.9,71.1]  | 57.0[54.2,59.8]  | -8.0[-11.1,-4.9]                                                |
| Mozambique | 2003 | Africa                | L                                  | Yes       | 1                | 47.6[45.5,49.7]  | 52.5[47.0,58.0]  | 46.3[43.5,49.1]  | -6.2[-9.4,-3.0]                                                 |
| Myanmar    | 2015 | South-East Asia       | LM                                 | Yes       | 0                | 37.1[35.6,38.6]  | 30.4[25.2,35.6]  | 37.3[35.5,39.1]  | 6.9[4.6,9.2]                                                    |
| Namibia    | 2013 | Africa                | UM                                 | Yes       | 1                | 87.4[86.4,88.4]  | 85.9[83.8,88.0]  | 89.0[87.8,90.2]  | 3.1[1.7,4.5]                                                    |
| Namibia    | 2006 | Africa                | LM                                 | Yes       | 1                | 91.9[90.7,93.1]  | 77.0[74.3,79.7]  | 91.9[90.5,93.3]  | 14.9[13.1,16.7]                                                 |
| Namibia    | 2000 | Africa                | LM                                 | Yes       | 1                | 76.8[75.3,78.4]  | 76.4[73.1,79.7]  | 77.0[75.1,78.9]  | 0.6[-1.7,2.9]                                                   |



**Appendix Table 7. Percentage of delivering in a health facility among adolescents 15-19 years old and adult mothers 20-34 years old<sup>1</sup> (continued)**

| Country     | Year | WHO region            | Income classification <sup>2</sup> | Countdown | SSA <sup>3</sup> | 15-34 (%)       | 15-19 (%)       | 20-34 (%)       | Absolute inequality between 20-34 and 15-19 (percentage points) |
|-------------|------|-----------------------|------------------------------------|-----------|------------------|-----------------|-----------------|-----------------|-----------------------------------------------------------------|
| Nepal       | 2016 | South-East Asia       | L                                  | Yes       | 0                | 57.4[55.9,58.9] | 62.7[59.6,65.8] | 56.3[54.5,58.1] | -6.4[-8.5,-4.3]                                                 |
| Nepal       | 2014 | South-East Asia       | L                                  | Yes       | 0                | 55.2[54.0,56.4] | 52.9[49.1,56.7] | 56.5[55.2,57.8] | 3.6[1.8,5.4]                                                    |
| Nepal       | 2011 | South-East Asia       | L                                  | Yes       | 0                | 35.3[33.8,36.8] | 40.2[36.8,43.6] | 35.2[33.5,36.9] | -5.0[-7.1,-2.9]                                                 |
| Nepal       | 2006 | South-East Asia       | L                                  | Yes       | 0                | 17.7[16.5,18.9] | 19.7[17.0,22.4] | 17.6[16.2,19.0] | -2.1[-3.8,-0.4]                                                 |
| Nepal       | 2001 | South-East Asia       | L                                  | Yes       | 0                | 9.1[8.3,9.9]    | 11.1[9.1,13.1]  | 8.9[7.9,9.9]    | -2.2[-3.4,-1.0]                                                 |
| Nicaragua   | 2001 | Americas              | L                                  | Yes       | 0                | 67.2[65.9,68.4] | 68.0[65.5,70.5] | 66.9[65.3,68.5] | -1.1[-3.0,0.8]                                                  |
| Niger       | 2012 | Africa                | L                                  | Yes       | 1                | 29.8[28.7,30.9] | 31.9[29.2,34.6] | 29.0[27.7,30.3] | -2.9[-4.6,-1.2]                                                 |
| Niger       | 2006 | Africa                | L                                  | Yes       | 1                | 16.5[15.5,17.5] | 15.6[13.0,18.2] | 16.8[15.4,18.2] | 1.2[-0.5,2.9]                                                   |
| Nigeria     | 2018 | Africa                | LM                                 | Yes       | 1                | 39.4[38.7,40.1] | 27.6[26.3,28.9] | 41.5[40.7,42.3] | 13.9[13.0,14.8]                                                 |
| Nigeria     | 2016 | Africa                | LM                                 | Yes       | 1                | 37.5[36.8,38.2] | 24.2[22.9,25.5] | 39.6[38.8,40.4] | 15.4[14.5,16.3]                                                 |
| Nigeria     | 2013 | Africa                | LM                                 | Yes       | 1                | 35.8[35.1,36.5] | 23.5[21.9,25.1] | 38.3[37.5,39.1] | 14.8[13.8,15.8]                                                 |
| Nigeria     | 2011 | Africa                | LM                                 | Yes       | 1                | 45.1[43.8,46.4] | 25.0[22.0,28.0] | 48.7[47.1,50.3] | 23.7[21.8,25.6]                                                 |
| Nigeria     | 2008 | Africa                | LM                                 | Yes       | 1                | 35.0[34.3,35.7] | 20.9[19.4,22.4] | 38.4[37.5,39.3] | 17.5[16.5,18.5]                                                 |
| Nigeria     | 2007 | Africa                | L                                  | Yes       | 1                | 40.5[39.8,41.2] | 26.9[25.1,28.7] | 45.9[45.0,46.8] | 19.0[17.9,20.1]                                                 |
| Nigeria     | 2003 | Africa                | L                                  | Yes       | 1                | 32.6[31.1,34.1] | 20.6[17.3,23.9] | 35.8[33.9,37.7] | 15.2[12.9,17.5]                                                 |
| Pakistan    | 2018 | Eastern Mediterranean | LM                                 | Yes       | 0                | 59.0[58.8,59.3] | 64.9[64.3,65.5] | 57.1[56.7,57.5] | -7.8[-8.2,-7.4]                                                 |
| Pakistan    | 2012 | Eastern Mediterranean | LM                                 | Yes       | 0                | 48.2[47.1,49.3] | 47.7[44.1,51.3] | 49.2[47.9,50.5] | 1.5[-0.1,3.1]                                                   |
| Pakistan    | 2006 | Eastern Mediterranean | L                                  | Yes       | 0                | 34.3[33.0,35.6] | 31.7[27.9,35.5] | 36.1[34.6,37.6] | 4.4[2.5,6.3]                                                    |
| Paraguay    | 2016 | Americas              | UM                                 | Yes       | 0                | 93.2[92.4,94.0] | 93.9[91.8,96.0] | 92.6[91.6,93.6] | -1.3[-2.5,-0.1]                                                 |
| Peru        | 2012 | Americas              | UM                                 | No        | 0                | 86.8[86.0,87.6] | 85.6[83.7,87.5] | 87.6[86.6,88.6] | 2.0[0.8,3.2]                                                    |
| Peru        | 2011 | Americas              | UM                                 | No        | 0                | 85.1[84.3,85.9] | 85.1[83.0,87.2] | 85.6[84.5,86.7] | 0.5[-0.8,1.8]                                                   |
| Peru        | 2010 | Americas              | UM                                 | No        | 0                | 84.4[83.6,85.2] | 83.4[81.3,85.5] | 85.3[84.3,86.3] | 1.9[0.6,3.2]                                                    |
| Peru        | 2009 | Americas              | UM                                 | No        | 0                | 82.0[81.2,82.8] | 79.3[77.2,81.4] | 82.6[81.5,83.7] | 3.3[2.0,4.6]                                                    |
| Peru        | 2007 | Americas              | LM                                 | No        | 0                | 79.9[79.2,80.7] | 79.8[78.1,81.5] | 80.0[79.1,80.9] | 0.2[-0.9,1.3]                                                   |
| Peru        | 2004 | Americas              | LM                                 | No        | 0                | 72.7[72.0,73.4] | 72.9[71.2,74.6] | 72.6[71.7,73.5] | -0.3[-1.4,0.8]                                                  |
| Peru        | 2000 | Americas              | LM                                 | No        | 0                | 57.9[57.0,58.8] | 54.6[52.3,56.9] | 60.2[59.0,61.4] | 5.6[4.2,7.0]                                                    |
| Philippines | 2017 | Western Pacific       | LM                                 | Yes       | 0                | 77.7[76.3,79.1] | 75.1[71.0,79.2] | 79.0[77.3,80.7] | 3.9[2.0,5.8]                                                    |
| Philippines | 2013 | Western Pacific       | LM                                 | Yes       | 0                | 62.5[61.2,63.8] | 62.4[58.9,65.9] | 62.5[60.9,64.1] | 0.1[-1.8,2.0]                                                   |
| Philippines | 2008 | Western Pacific       | LM                                 | Yes       | 0                | 44.2[42.8,45.6] | 36.6[32.5,40.7] | 45.6[43.9,47.3] | 9.0[6.9,11.1]                                                   |
| Philippines | 2003 | Western Pacific       | LM                                 | Yes       | 0                | 37.9[36.5,39.3] | 33.4[29.1,37.7] | 39.4[37.8,41.0] | 6.0[4.0,8.0]                                                    |

**Appendix Table 7. Percentage of delivering in a health facility among adolescents 15-19 years old and adult mothers 20-34 years old<sup>1</sup> (continued)**

| Country               | Year | WHO region            | Income classification <sup>2</sup> | Countdown | SSA <sup>3</sup> | 15-34 (%)        | 15-19 (%)        | 20-34 (%)        | Absolute inequality between 20-34 and 15-19 (percentage points) |
|-----------------------|------|-----------------------|------------------------------------|-----------|------------------|------------------|------------------|------------------|-----------------------------------------------------------------|
| Rwanda                | 2014 | Africa                | L                                  | Yes       | 1                | 91.9[91.2,92.7]  | 93.5[91.6,95.4]  | 91.4[90.6,92.2]  | -2.1[-3.1,-1.1]                                                 |
| Rwanda                | 2010 | Africa                | L                                  | Yes       | 1                | 73.4[72.3,74.5]  | 81.7[78.4,85.0]  | 70.6[69.3,71.9]  | -11.1[-12.6,-9.6]                                               |
| Rwanda                | 2005 | Africa                | L                                  | Yes       | 1                | 31.9[30.7,33.1]  | 39.2[33.9,44.5]  | 29.5[28.0,31.0]  | -9.7[-11.8,-7.6]                                                |
| Rwanda                | 2000 | Africa                | L                                  | Yes       | 1                | 30.3[29.1,31.5]  | 36.8[32.3,41.3]  | 28.1[26.5,29.7]  | -8.7[-10.8,-6.6]                                                |
| Sao Tome and Principe | 2014 | Africa                | LM                                 | No        | 1                | 91.9[90.2,93.7]  | 92.7[88.5,96.9]  | 91.7[89.4,94.0]  | -1.0[-4.1,2.1]                                                  |
| Sao Tome and Principe | 2008 | Africa                | LM                                 | No        | 1                | 78.8[76.8,80.8]  | 81.9[77.5,86.3]  | 78.1[75.3,80.9]  | -3.8[-6.9,-0.7]                                                 |
| Senegal               | 2017 | Africa                | L                                  | Yes       | 1                | 78.6[77.2,80.0]  | 78.3[75.1,81.5]  | 78.7[76.9,80.5]  | 0.4[-1.7,2.5]                                                   |
| Senegal               | 2016 | Africa                | L                                  | Yes       | 1                | 75.9[75.0,76.8]  | 77.1[74.8,79.4]  | 75.6[74.5,76.7]  | -1.5[-2.9,-0.1]                                                 |
| Senegal               | 2010 | Africa                | LM                                 | Yes       | 1                | 72.8[71.9,73.7]  | 70.9[68.5,73.3]  | 73.0[71.8,74.2]  | 2.1[0.5,3.7]                                                    |
| Senegal               | 2005 | Africa                | L                                  | Yes       | 1                | 82.0[80.9,83.1]  | 79.3[76.6,82.0]  | 82.6[81.2,84.0]  | 3.3[1.6,5.0]                                                    |
| Serbia                | 2014 | Europe                | UM                                 | No        | 0                | 97.2[96.6,97.8]  | 94.3[93.3,95.3]  | 98.2[97.5,98.9]  | 3.9[3.1,4.7]                                                    |
| Serbia                | 2010 | Europe                | UM                                 | No        | 0                | 99.8[99.5,100.0] | 97.7[97.1,98.3]  | 99.8[99.4,100.0] | 2.1[1.7,2.5]                                                    |
| Serbia                | 2005 | Europe                | UM                                 | No        | 0                | 98.8[98.2,99.4]  | 98.6[96.4,100.0] | 98.9[98.2,99.6]  | 0.3[-0.8,1.4]                                                   |
| Sierra Leone          | 2017 | Africa                | L                                  | Yes       | 1                | 76.7[75.6,77.8]  | 76.3[74.1,78.5]  | 76.8[75.1,78.5]  | 0.5[-1.3,2.3]                                                   |
| Sierra Leone          | 2013 | Africa                | L                                  | Yes       | 1                | 55.0[53.9,56.0]  | 56.4[54.2,58.6]  | 54.5[53.2,55.8]  | -1.9[-3.5,-0.3]                                                 |
| Sierra Leone          | 2010 | Africa                | L                                  | Yes       | 1                | 50.1[48.9,51.3]  | 53.5[49.9,57.1]  | 49.3[47.8,50.8]  | -4.2[-6.2,-2.2]                                                 |
| Sierra Leone          | 2008 | Africa                | L                                  | Yes       | 1                | 25.1[23.7,26.4]  | 25.9[22.5,29.3]  | 24.8[23.1,26.5]  | -1.1[-3.3,1.1]                                                  |
| Sierra Leone          | 2005 | Africa                | L                                  | Yes       | 1                | 18.6[17.4,19.8]  | 18.2[12.9,23.5]  | 19.3[17.9,20.7]  | 1.1[-0.7,2.9]                                                   |
| Somalia               | 2006 | Africa                | L                                  | Yes       | 1                | 9.4[8.5,10.3]    | 7.6[5.6,9.6]     | 10.9[9.8,12.0]   | 3.3[2.0,4.6]                                                    |
| South Sudan           | 2010 | Africa                | L                                  | Yes       | 1                | 12.5[11.1,13.9]  | 14.9[12.0,17.8]  | 11.7[10.0,13.4]  | -3.2[-5.2,-1.2]                                                 |
| Sudan                 | 2014 | Africa                | LM                                 | Yes       | 1                | 27.5[26.2,28.8]  | 27.5[25.7,29.3]  | 27.5[25.7,29.3]  | 0.0[-1.8,1.8]                                                   |
| Suriname              | 2018 | Americas              | UM                                 | Yes       | 0                | 92.9[92.1,93.7]  | 94.0[92.1,95.9]  | 91.9[91.0,92.8]  | -2.1[-3.2,-1.0]                                                 |
| Suriname              | 2010 | Americas              | UM                                 | Yes       | 0                | 91.8[91.6,92.1]  | 91.3[90.7,91.9]  | 92.0[91.6,92.4]  | 0.7[0.2,1.2]                                                    |
| Suriname              | 2006 | Americas              | LM                                 | Yes       | 0                | 89.4[88.0,90.8]  | 88.7[85.1,92.3]  | 89.6[87.9,91.3]  | 0.9[-1.3,3.1]                                                   |
| Swaziland             | 2014 | Africa                | LM                                 | Yes       | 1                | 87.7[86.2,89.2]  | 88.3[85.0,91.6]  | 87.4[85.5,89.3]  | -0.9[-3.1,1.3]                                                  |
| Syrian Arab Republic  | 2006 | Eastern Mediterranean | LM                                 | No        | 0                | 70.4[69.1,71.7]  | 77.5[74.2,80.8]  | 70.0[68.4,71.6]  | -7.5[-9.5,-5.5]                                                 |
| Tajikistan            | 2017 | Europe                | LM                                 | Yes       | 0                | 88.2[87.6,88.8]  | 91.2[89.0,93.4]  | 88.1[87.5,88.7]  | -3.1[-4.1,-2.1]                                                 |
| Tajikistan            | 2012 | Europe                | L                                  | Yes       | 0                | 78.0[76.6,79.4]  | 79.1[74.9,83.3]  | 77.6[76.1,79.1]  | -1.5[-3.3,0.3]                                                  |
| Tajikistan            | 2005 | Europe                | L                                  | Yes       | 0                | 68.1[66.7,69.4]  | 85.6[82.0,89.2]  | 62.2[60.5,63.9]  | -23.4[-25.6,-21.2]                                              |

**Appendix Table 7. Percentage of delivering in a health facility among adolescents 15-19 years old and adult mothers 20-34 years old<sup>1</sup> (continued)**

| Country                                   | Year | WHO region            | Income classification <sup>2</sup> | Countdown | SSA <sup>3</sup> | 15-34 (%)       | 15-19 (%)        | 20-34 (%)        | Absolute inequality between 20-34 and 15-19 (percentage points) |
|-------------------------------------------|------|-----------------------|------------------------------------|-----------|------------------|-----------------|------------------|------------------|-----------------------------------------------------------------|
| Tanzania                                  | 2015 | Africa                | L                                  | Yes       | 1                | 63.7[62.6,64.9] | 65.9[63.2,68.6]  | 63.0[61.6,64.4]  | -2.9[-4.7,-1.1]                                                 |
| Tanzania                                  | 2010 | Africa                | L                                  | Yes       | 1                | 50.2[49.2,51.2] | 54.8[51.9,57.7]  | 50.0[48.7,51.3]  | -4.8[-6.5,-3.1]                                                 |
| Tanzania                                  | 2004 | Africa                | L                                  | Yes       | 1                | 48.2[47.0,49.5] | 49.9[46.7,53.1]  | 47.7[46.1,49.3]  | -2.2[-4.2,-0.2]                                                 |
| Thailand                                  | 2015 | South-East Asia       | UM                                 | No        | 0                | 98.3[98.1,98.6] | 98.4[97.8,99.0]  | 98.3[98.0,98.6]  | -0.1[-0.5,0.3]                                                  |
| Thailand                                  | 2012 | South-East Asia       | UM                                 | No        | 0                | 99.6[99.3,99.9] | 98.2[96.7,99.7]  | 99.7[99.4,100.0] | 1.5[0.9,2.1]                                                    |
| Thailand                                  | 2005 | South-East Asia       | LM                                 | No        | 0                | 97.2[95.3,99.1] | 97.2[91.3,100.0] | 97.2[94.9,99.5]  | 0.0[-2.8,2.8]                                                   |
| The former Yugoslav Republic of Macedonia | 2005 | Europe                | LM                                 | No        | 0                | 98.2[97.1,99.3] | 98.6[96.1,100.0] | 97.0[95.7,98.3]  | -1.6[-3.1,-0.1]                                                 |
| Timor-Leste                               | 2009 | South-East Asia       | LM                                 | Yes       | 0                | 23.5[22.8,24.2] | 23.5[21.4,25.6]  | 23.5[22.8,24.2]  | 0.0[-0.9,0.9]                                                   |
| Togo                                      | 2013 | Africa                | L                                  | Yes       | 1                | 74.0[72.8,75.2] | 73.1[69.5,76.7]  | 74.3[72.8,75.8]  | 1.2[-0.7,3.1]                                                   |
| Togo                                      | 2010 | Africa                | L                                  | Yes       | 1                | 68.6[67.2,70.0] | 74.3[71.3,77.3]  | 66.7[65.0,68.4]  | -7.6[-9.7,-5.5]                                                 |
| Togo                                      | 2006 | Africa                | L                                  | Yes       | 1                | 65.2[63.9,66.6] | 66.6[63.3,69.9]  | 64.8[63.1,66.5]  | -1.8[-3.7,0.1]                                                  |
| Tunisia                                   | 2018 | Eastern Mediterranean | LM                                 | No        | 0                | 99.5[99.2,99.8] | 99.0[98.4,99.6]  | 99.7[99.3,100.0] | 0.7[0.3,1.1]                                                    |
| Turkey                                    | 2003 | Europe                | LM                                 | No        | 0                | 78.2[76.9,79.5] | 77.6[73.4,81.8]  | 78.9[77.4,80.4]  | 1.3[-0.6,3.2]                                                   |
| Turkmenistan                              | 2015 | Europe                | UM                                 | Yes       | 0                | 99.0[98.2,99.7] | 97.7[96.0,99.4]  | 99.4[98.5,100.0] | 1.7[0.6,2.8]                                                    |
| Turkmenistan                              | 2006 | Europe                | LM                                 | Yes       | 0                | 97.8[96.7,98.9] | 99.0[96.5,100.0] | 97.6[96.3,98.9]  | -1.4[-3.1,0.3]                                                  |
| Uganda                                    | 2016 | Africa                | L                                  | Yes       | 1                | 73.4[72.6,74.2] | 77.6[75.8,79.4]  | 73.4[72.4,74.4]  | -4.2[-5.4,-3.0]                                                 |
| Uganda                                    | 2011 | Africa                | L                                  | Yes       | 1                | 57.4[56.0,58.8] | 64.8[61.7,67.9]  | 56.5[54.8,58.2]  | -8.3[-10.3,-6.3]                                                |
| Uganda                                    | 2006 | Africa                | L                                  | Yes       | 1                | 41.1[39.7,42.5] | 47.8[44.5,51.1]  | 41.0[39.3,42.7]  | -6.8[-8.9,-4.7]                                                 |
| Uganda                                    | 2000 | Africa                | L                                  | Yes       | 1                | 36.6[35.1,38.1] | 45.5[42.2,48.8]  | 35.3[33.5,37.1]  | -10.2[-12.5,-7.9]                                               |
| Ukraine                                   | 2012 | Europe                | LM                                 | No        | 0                | 98.9[98.6,99.2] | 97.6[97.1,98.1]  | 99.1[98.8,99.4]  | 1.5[1.1,1.9]                                                    |
| Ukraine                                   | 2007 | Europe                | LM                                 | No        | 0                | 99.0[98.7,99.3] | 97.8[96.5,99.1]  | 99.0[98.7,99.3]  | 1.2[0.6,1.8]                                                    |
| Ukraine                                   | 2005 | Europe                | LM                                 | No        | 0                | 99.4[99.1,99.8] | 99.0[98.0,100.0] | 99.6[99.2,100.0] | 0.6[0.0,1.2]                                                    |

**Appendix Table 7. Percentage of delivering in a health facility among adolescents 15-19 years old and adult mothers 20-34 years old<sup>1</sup> (continued)**

| Country                  | Year | WHO region            | Income classification <sup>2</sup> | Countdown | SSA <sup>3</sup> | 15-34 (%)        | 15-19 (%)        | 20-34 (%)        | Absolute inequality between 20-34 and 15-19 (percentage points) |
|--------------------------|------|-----------------------|------------------------------------|-----------|------------------|------------------|------------------|------------------|-----------------------------------------------------------------|
| Uzbekistan               | 2006 | Europe                | L                                  | Yes       | 0                | 97.3[97.1,97.5]  | 92.8[90.5,95.1]  | 98.0[97.7,98.3]  | 5.2[4.3,6.1]                                                    |
| Vanuatu                  | 2007 | Western Pacific       | LM                                 | No        | 0                | 79.8[78.6,81.0]  | 71.8[68.7,74.9]  | 83.1[81.7,84.5]  | 11.3[9.6,13.0]                                                  |
| Vietnam                  | 2013 | Western Pacific       | LM                                 | No        | 0                | 93.6[92.2,95.0]  | 84.8[82.4,87.2]  | 94.7[93.1,96.3]  | 9.9[8.1,11.7]                                                   |
| Vietnam                  | 2010 | Western Pacific       | LM                                 | No        | 0                | 92.9[91.5,94.3]  | 85.0[81.4,88.6]  | 93.6[92.0,95.2]  | 8.6[6.4,10.8]                                                   |
| Vietnam                  | 2006 | Western Pacific       | L                                  | No        | 0                | 63.8[61.5,66.1]  | 41.0[34.9,47.1]  | 65.9[63.4,68.4]  | 24.9[21.7,28.1]                                                 |
| Vietnam                  | 2002 | Western Pacific       | L                                  | No        | 0                | 78.5[76.2,80.8]  | 64.1[56.5,71.7]  | 79.4[77.0,81.8]  | 15.3[12.3,18.3]                                                 |
| West Bank and Gaza Strip | 2014 | Eastern Mediterranean | LM                                 | No        | 0                | 99.3[98.6,100.0] | 98.0[95.9,100.0] | 99.7[98.9,100.0] | 1.7[0.4,3.0]                                                    |
| Yemen                    | 2013 | Eastern Mediterranean | LM                                 | Yes       | 0                | 30.4[29.6,31.3]  | 32.1[29.5,34.7]  | 29.9[28.8,31.0]  | -2.2[-3.6,-0.8]                                                 |
| Yemen                    | 2006 | Eastern Mediterranean | L                                  | Yes       | 0                | 22.7[21.2,24.2]  | 22.4[18.5,26.3]  | 22.8[21.0,24.6]  | 0.4[-1.9,2.7]                                                   |
| Zambia                   | 2013 | Africa                | LM                                 | Yes       | 1                | 68.9[68.0,69.8]  | 72.5[70.6,74.4]  | 67.7[66.6,68.8]  | -4.8[-6.1,-3.5]                                                 |
| Zambia                   | 2007 | Africa                | L                                  | Yes       | 1                | 49.6[48.1,51.1]  | 54.2[50.8,57.6]  | 48.1[46.2,50.0]  | -6.1[-8.4,-3.8]                                                 |
| Zambia                   | 2001 | Africa                | L                                  | Yes       | 1                | 44.6[43.1,46.0]  | 44.8[41.7,47.9]  | 44.5[42.7,46.3]  | -0.3[-2.5,1.9]                                                  |
| Zimbabwe                 | 2019 | Africa                | L                                  | Yes       | 1                | 86.1[84.6,87.6]  | 84.7[81.5,87.9]  | 86.3[84.5,88.1]  | 1.6[-0.7,3.9]                                                   |
| Zimbabwe                 | 2015 | Africa                | L                                  | Yes       | 1                | 77.0[75.6,78.4]  | 76.0[72.8,79.2]  | 77.7[76.0,79.4]  | 1.7[-0.3,3.7]                                                   |
| Zimbabwe                 | 2014 | Africa                | L                                  | Yes       | 1                | 79.6[78.1,81.1]  | 80.7[78.2,83.2]  | 79.5[77.6,81.4]  | -1.2[-3.2,0.8]                                                  |
| Zimbabwe                 | 2010 | Africa                | L                                  | Yes       | 1                | 65.1[63.6,66.6]  | 62.6[59.4,65.8]  | 66.1[64.4,67.8]  | 3.5[1.4,5.6]                                                    |
| Zimbabwe                 | 2005 | Africa                | L                                  | Yes       | 1                | 68.9[67.4,70.4]  | 67.1[63.8,70.4]  | 69.5[67.7,71.3]  | 2.4[0.2,4.6]                                                    |

Appendix Table 8. Percentage of receiving a postnatal checkup within 24 hours of delivery among adolescents 15-19 years old and adult mothers 20-34 years old<sup>1</sup>

| Country                          | Year | WHO region            | Income classification <sup>2</sup> | Countdown | SSA <sup>3</sup> | 15-34 (%)       | 15-19 (%)       | 20-34 (%)       | Absolute inequality between 20-34 and 15-19 (percentage points) |
|----------------------------------|------|-----------------------|------------------------------------|-----------|------------------|-----------------|-----------------|-----------------|-----------------------------------------------------------------|
| Afghanistan                      | 2015 | Eastern Mediterranean | L                                  | Yes       | 0                | 37.5[36.5,38.5] | 33.4[30.6,36.2] | 38.3[37.1,39.5] | 4.9[3.3,6.5]                                                    |
| Albania                          | 2017 | Europe                | UM                                 | No        | 0                | 80.8[79.9,81.7] | 67.5[65.0,70.0] | 81.9[80.8,83.0] | 14.4[13.1,15.7]                                                 |
| Albania                          | 2008 | Europe                | LM                                 | No        | 0                | 71.7[70.9,72.5] | 68.4[67.0,69.8] | 72.0[70.6,73.4] | 3.6[2.2,5.0]                                                    |
| Angola                           | 2015 | Africa                | UM                                 | Yes       | 1                | 16.4[14.8,18.0] | 15.6[12.4,18.8] | 17.1[15.1,19.1] | 1.5[-0.9,3.9]                                                   |
| Armenia                          | 2015 | Europe                | LM                                 | No        | 0                | 73.2[71.5,74.9] | 66.2[58.3,74.1] | 73.2[71.0,75.4] | 7.0[3.9,10.1]                                                   |
| Armenia                          | 2010 | Europe                | LM                                 | No        | 0                | 68.0[67.6,68.4] | 83.4[79.9,86.9] | 66.2[65.8,66.6] | -17.2[-18.3,-16.1]                                              |
| Armenia                          | 2005 | Europe                | LM                                 | No        | 0                | 78.2[76.5,79.8] | 76.8[71.8,81.8] | 78.6[76.9,80.3] | 1.8[-0.3,3.9]                                                   |
| Azerbaijan                       | 2006 | Europe                | LM                                 | Yes       | 0                | 53.7[50.8,56.6] | 45.9[37.0,54.8] | 54.0[50.9,57.1] | 8.1[4.2,12.0]                                                   |
| Bangladesh                       | 2014 | South-East Asia       | LM                                 | Yes       | 0                | 31.8[29.7,33.9] | 31.6[28.0,35.2] | 32.1[29.4,34.8] | 0.5[-2.5,3.5]                                                   |
| Bangladesh                       | 2011 | South-East Asia       | L                                  | Yes       | 0                | 25.3[23.8,26.8] | 23.7[21.0,26.4] | 25.9[24.0,27.8] | 2.2[0.0,4.4]                                                    |
| Bangladesh                       | 2007 | South-East Asia       | L                                  | Yes       | 0                | 24.5[23.0,26.0] | 22.4[19.8,25.0] | 25.8[23.7,27.9] | 3.4[1.1,5.7]                                                    |
| Benin                            | 2018 | Africa                | L                                  | Yes       | 1                | 35.2[33.4,37.0] | 33.8[29.1,38.5] | 36.3[34.1,38.5] | 2.5[-0.2,5.2]                                                   |
| Benin                            | 2011 | Africa                | L                                  | Yes       | 1                | 39.6[38.6,40.6] | 39.7[37.0,42.4] | 39.6[38.4,40.8] | -0.1[-1.6,1.4]                                                  |
| Bolivia                          | 2008 | Americas              | LM                                 | Yes       | 0                | 66.9[65.2,68.6] | 67.5[63.8,71.2] | 66.7[64.7,68.7] | -0.8[-3.2,1.6]                                                  |
| Burkina Faso                     | 2010 | Africa                | L                                  | Yes       | 1                | 54.3[53.0,55.6] | 58.3[55.3,61.3] | 53.4[51.9,54.9] | -4.9[-6.8,-3.0]                                                 |
| Burundi                          | 2016 | Africa                | L                                  | Yes       | 1                | 47.8[46.6,49.0] | 46.4[43.0,49.8] | 48.3[46.9,49.7] | 1.9[0.1,3.7]                                                    |
| Burundi                          | 2010 | Africa                | L                                  | Yes       | 1                | 26.1[24.1,28.1] | 27.0[21.5,32.5] | 25.8[23.4,28.2] | -1.2[-4.2,1.8]                                                  |
| Cambodia                         | 2014 | Western Pacific       | L                                  | Yes       | 0                | 86.0[84.6,87.4] | 80.9[76.7,85.1] | 87.1[85.5,88.7] | 6.2[4.2,8.2]                                                    |
| Cambodia                         | 2010 | Western Pacific       | L                                  | Yes       | 0                | 62.6[60.8,64.4] | 62.2[56.7,67.7] | 62.7[60.6,64.8] | 0.5[-2.1,3.1]                                                   |
| Cambodia                         | 2005 | Western Pacific       | L                                  | Yes       | 0                | 42.9[41.3,44.5] | 42.3[37.8,46.8] | 43.6[41.8,45.4] | 1.3[-1.0,3.6]                                                   |
| Cameroon                         | 2011 | Africa                | LM                                 | Yes       | 1                | 25.3[23.6,27.0] | 23.2[19.6,26.8] | 25.6[23.6,27.6] | 2.4[-0.1,4.9]                                                   |
| Chad                             | 2014 | Africa                | L                                  | Yes       | 1                | 12.3[11.1,13.5] | 8.4[5.8,11.0]   | 12.8[11.4,14.2] | 4.4[2.7,6.1]                                                    |
| Comoros                          | 2012 | Africa                | L                                  | Yes       | 1                | 37.2[34.2,40.2] | 35.3[27.1,43.5] | 37.9[34.4,41.4] | 2.6[-2.0,7.2]                                                   |
| Congo                            | 2011 | Africa                | LM                                 | Yes       | 1                | 35.9[34.9,36.9] | 36.8[34.2,39.4] | 32.8[31.2,34.4] | -4.0[-5.9,-2.1]                                                 |
| Côte d'Ivoire                    | 2011 | Africa                | LM                                 | Yes       | 1                | 63.2[61.3,65.2] | 63.3[58.6,68.0] | 63.2[60.8,65.6] | -0.1[-3.1,2.9]                                                  |
| Democratic Republic of the Congo | 2013 | Africa                | L                                  | Yes       | 1                | 25.5[24.4,26.6] | 21.0[18.3,23.7] | 25.8[24.3,27.3] | 4.8[3.0,6.6]                                                    |

**Note:**

1. We mark the countries with absolute inequality (difference) between mothers 20-34 and 15-19 years old larger than 5 percentage points in orange.
2. Income classification: "L" represents "low-income country"; "LM" represents "lower-middle-income country"; "UM" represents "upper-middle-income country".
3. SSA: "1" represents "Sub-Saharan African country"; "0" represents "Not a Sub-Saharan African country".

Appendix Table 8. Percentage of receiving a postnatal checkup within 24 hours of delivery among adolescents 15-19 years old and adult mothers 20-34 years old<sup>1</sup> (continued)

| Country            | Year | WHO region            | Income classification <sup>2</sup> | Countdown | SSA <sup>3</sup> | 15-34 (%)       | 15-19 (%)       | 20-34 (%)       | Absolute inequality between 20-34 and 15-19 (percentage points) |
|--------------------|------|-----------------------|------------------------------------|-----------|------------------|-----------------|-----------------|-----------------|-----------------------------------------------------------------|
| Dominican Republic | 2013 | Americas              | UM                                 | Yes       | 0                | 72.8[72.2,73.4] | 67.8[66.5,69.1] | 74.2[73.2,75.2] | 6.4[5.4,7.4]                                                    |
| Dominican Republic | 2007 | Americas              | LM                                 | Yes       | 0                | 75.3[74.9,75.7] | 72.6[71.7,73.5] | 76.2[75.6,76.8] | 3.6[2.9,4.3]                                                    |
| Ethiopia           | 2016 | Africa                | L                                  | Yes       | 1                | 15.8[14.2,17.4] | 11.4[6.9,15.9]  | 17.0[15.0,19.0] | 5.6[3.0,8.2]                                                    |
| Ethiopia           | 2011 | Africa                | L                                  | Yes       | 1                | 6.0[4.9,7.1]    | 3.7[0.5,6.9]    | 6.7[5.2,8.2]    | 3.0[1.1,4.9]                                                    |
| Ethiopia           | 2005 | Africa                | L                                  | Yes       | 1                | 4.1[3.2,5.0]    | 3.5[0.4,6.6]    | 4.5[3.0,6.0]    | 1.0[-0.9,2.9]                                                   |
| Gabon              | 2012 | Africa                | UM                                 | Yes       | 1                | 33.2[31.1,35.3] | 29.1[25.2,33.0] | 34.0[31.4,36.6] | 4.9[1.9,7.9]                                                    |
| Gambia             | 2013 | Africa                | L                                  | Yes       | 1                | 73.8[71.9,75.7] | 75.7[70.9,80.5] | 73.4[71.0,75.8] | -2.3[-5.3,0.7]                                                  |
| Ghana              | 2014 | Africa                | LM                                 | Yes       | 1                | 72.0[70.0,74.0] | 65.9[60.0,71.8] | 73.6[71.2,76.0] | 7.7[4.5,10.9]                                                   |
| Ghana              | 2008 | Africa                | L                                  | Yes       | 1                | 57.4[54.3,60.5] | 49.5[40.4,58.6] | 59.7[55.9,63.5] | 10.2[5.2,15.2]                                                  |
| Guatemala          | 2014 | Americas              | LM                                 | Yes       | 0                | 46.8[45.3,48.3] | 46.4[43.4,49.4] | 46.9[45.1,48.7] | 0.5[-1.6,2.6]                                                   |
| Guinea             | 2018 | Africa                | L                                  | Yes       | 1                | 46.0[44.0,48.1] | 46.2[41.2,51.2] | 46.0[43.4,48.6] | -0.2[-3.6,3.2]                                                  |
| Guinea             | 2012 | Africa                | L                                  | Yes       | 1                | 34.8[32.7,36.9] | 34.8[30.5,39.1] | 34.8[32.2,37.4] | 0.0[-3.1,3.1]                                                   |
| Guyana             | 2009 | Americas              | LM                                 | Yes       | 0                | 62.5[60.4,64.6] | 61.8[56.4,67.2] | 63.4[59.9,66.9] | 1.6[-2.3,5.5]                                                   |
| Haiti              | 2016 | Americas              | L                                  | Yes       | 0                | 23.4[21.6,25.2] | 17.0[11.2,22.8] | 23.9[21.7,26.1] | 6.9[4.2,9.6]                                                    |
| Haiti              | 2012 | Americas              | L                                  | Yes       | 0                | 23.5[21.5,25.5] | 21.7[16.9,26.5] | 24.8[22.4,27.2] | 3.1[0.1,6.1]                                                    |
| Honduras           | 2011 | Americas              | LM                                 | Yes       | 0                | 76.2[75.0,77.4] | 78.9[76.5,81.3] | 75.5[73.9,77.1] | -3.4[-5.2,-1.6]                                                 |
| Honduras           | 2006 | Americas              | LM                                 | Yes       | 0                | 56.6[56.2,57.0] | 57.2[56.3,58.1] | 56.4[55.8,57.0] | -0.8[-1.5,-0.1]                                                 |
| India              | 2015 | South-East Asia       | LM                                 | Yes       | 0                | 22.9[22.6,23.2] | 21.5[20.8,22.2] | 23.1[22.8,23.4] | 1.6[1.2,2.0]                                                    |
| India              | 2006 | South-East Asia       | L                                  | Yes       | 0                | 32.2[31.0,33.4] | 28.8[26.3,31.3] | 33.6[32.4,34.8] | 4.8[3.3,6.3]                                                    |
| Indonesia          | 2012 | South-East Asia       | LM                                 | Yes       | 0                | 69.1[68.0,70.2] | 64.2[61.2,67.2] | 69.8[68.5,71.1] | 5.6[4.0,7.2]                                                    |
| Jordan             | 2018 | Eastern Mediterranean | LM                                 | No        | 0                | 68.4[66.5,70.3] | 63.0[57.2,68.8] | 70.2[68.1,72.3] | 7.2[4.7,9.7]                                                    |
| Jordan             | 2012 | Eastern Mediterranean | UM                                 | No        | 0                | 65.6[65.2,66.0] | 54.0[51.7,56.3] | 67.2[66.8,67.6] | 13.2[12.6,13.8]                                                 |
| Jordan             | 2007 | Eastern Mediterranean | LM                                 | No        | 0                | 33.7[33.3,34.1] | 29.8[27.3,32.3] | 34.1[33.6,34.6] | 4.3[3.6,5.0]                                                    |
| Kenya              | 2014 | Africa                | LM                                 | Yes       | 1                | 47.8[46.7,48.9] | 48.4[45.4,51.4] | 47.6[46.2,49.0] | -0.8[-2.6,1.0]                                                  |
| Kenya              | 2008 | Africa                | L                                  | Yes       | 1                | 35.2[32.9,37.5] | 34.5[29.1,39.9] | 35.7[33.0,38.4] | 1.2[-2.2,4.6]                                                   |
| Kyrgyzstan         | 2012 | Europe                | L                                  | Yes       | 0                | 88.0[87.7,88.3] | 87.4[87.4,87.4] | 88.2[87.8,88.6] | 0.8[0.4,1.2]                                                    |
| Lesotho            | 2014 | Africa                | LM                                 | Yes       | 1                | 45.0[42.2,47.8] | 45.9[40.1,51.7] | 44.2[40.7,47.7] | -1.7[-5.8,2.4]                                                  |
| Lesotho            | 2009 | Africa                | LM                                 | Yes       | 1                | 32.6[30.0,35.2] | 31.0[25.6,36.4] | 33.9[30.6,37.2] | 2.9[-1.0,6.8]                                                   |
| Liberia            | 2013 | Africa                | L                                  | Yes       | 1                | 62.9[60.9,64.9] | 63.5[59.3,67.7] | 61.8[59.2,64.4] | -1.7[-4.7,1.3]                                                  |
| Liberia            | 2007 | Africa                | L                                  | Yes       | 1                | 51.3[49.0,53.6] | 50.9[45.8,56.0] | 51.4[48.5,54.3] | 0.5[-3.1,4.1]                                                   |

Appendix Table 8. Percentage of receiving a postnatal checkup within 24 hours of delivery among adolescents 15-19 years old and adult mothers 20-34 years old<sup>1</sup> (continued)

| Country     | Year | WHO region            | Income classification <sup>2</sup> | Countdown | SSA <sup>3</sup> | 15-34 (%)       | 15-19 (%)       | 20-34 (%)       | Absolute inequality between 20-34 and 15-19 (percentage points) |
|-------------|------|-----------------------|------------------------------------|-----------|------------------|-----------------|-----------------|-----------------|-----------------------------------------------------------------|
| Madagascar  | 2008 | Africa                | L                                  | Yes       | 1                | 25.7[24.2,27.2] | 23.5[20.3,26.7] | 26.2[24.2,28.2] | 2.7[0.4,5.0]                                                    |
| Malawi      | 2015 | Africa                | L                                  | Yes       | 1                | 33.4[32.6,34.2] | 29.0[27.4,30.6] | 34.2[33.2,35.2] | 5.2[4.0,6.4]                                                    |
| Malawi      | 2010 | Africa                | L                                  | Yes       | 1                | 32.1[30.9,33.3] | 31.5[29.0,34.0] | 32.3[30.9,33.7] | 0.8[-0.9,2.5]                                                   |
| Maldives    | 2017 | South-East Asia       | UM                                 | No        | 0                | 75.4[74.5,76.3] | 83.8[81.4,86.2] | 75.3[74.3,76.3] | -8.5[-9.9,-7.1]                                                 |
| Maldives    | 2009 | South-East Asia       | LM                                 | No        | 0                | 60.6[59.6,61.6] | 67.3[64.1,70.5] | 58.4[57.3,59.5] | -8.9[-10.2,-7.6]                                                |
| Mali        | 2018 | Africa                | L                                  | Yes       | 1                | 54.9[53.7,56.1] | 54.9[53.5,56.3] | 54.5[53.1,55.9] | -0.4[-1.8,1.0]                                                  |
| Mali        | 2012 | Africa                | L                                  | Yes       | 1                | 37.2[35.4,39.0] | 35.7[31.8,39.6] | 38.1[35.9,40.3] | 2.4[-0.3,5.1]                                                   |
| Myanmar     | 2015 | South-East Asia       | LM                                 | Yes       | 0                | 57.0[54.7,59.3] | 49.2[41.4,57.0] | 57.5[54.8,60.2] | 8.3[4.9,11.7]                                                   |
| Namibia     | 2013 | Africa                | UM                                 | Yes       | 1                | 48.1[46.6,49.6] | 41.3[38.1,44.5] | 49.2[47.4,51.0] | 7.9[5.7,10.1]                                                   |
| Namibia     | 2006 | Africa                | LM                                 | Yes       | 1                | 45.0[43.2,46.8] | 39.8[35.7,43.9] | 46.6[44.5,48.7] | 6.8[4.2,9.4]                                                    |
| Nepal       | 2016 | South-East Asia       | L                                  | Yes       | 0                | 54.5[52.2,56.8] | 53.6[49.0,58.2] | 55.0[52.3,57.7] | 1.4[-1.7,4.5]                                                   |
| Nepal       | 2011 | South-East Asia       | L                                  | Yes       | 0                | 41.1[38.9,43.3] | 44.3[39.2,49.4] | 40.9[38.3,43.5] | -3.4[-6.6,-0.2]                                                 |
| Nepal       | 2006 | South-East Asia       | L                                  | Yes       | 0                | 27.9[26.1,29.6] | 28.9[24.8,33.0] | 27.5[25.5,29.5] | -1.4[-3.9,1.1]                                                  |
| Niger       | 2012 | Africa                | L                                  | Yes       | 1                | 32.9[31.3,34.5] | 32.9[28.9,36.9] | 32.1[30.1,34.1] | -0.8[-3.3,1.7]                                                  |
| Nigeria     | 2018 | Africa                | LM                                 | Yes       | 1                | 39.9[38.9,40.9] | 29.2[27.3,31.1] | 41.3[40.1,42.5] | 12.1[10.7,13.5]                                                 |
| Nigeria     | 2013 | Africa                | LM                                 | Yes       | 1                | 35.9[34.9,36.9] | 27.6[25.2,30.0] | 37.9[36.7,39.1] | 10.3[8.8,11.8]                                                  |
| Nigeria     | 2008 | Africa                | LM                                 | Yes       | 1                | 33.1[32.0,34.2] | 24.2[21.9,26.5] | 35.2[33.9,36.5] | 11.0[9.5,12.5]                                                  |
| Pakistan    | 2018 | Eastern Mediterranean | LM                                 | Yes       | 0                | 59.3[58.9,59.7] | 51.1[50.2,52.0] | 61.2[60.6,61.8] | 10.1[9.5,10.7]                                                  |
| Pakistan    | 2012 | Eastern Mediterranean | LM                                 | Yes       | 0                | 58.5[56.8,60.2] | 56.2[50.8,61.6] | 59.5[57.6,61.4] | 3.3[0.9,5.7]                                                    |
| Pakistan    | 2006 | Eastern Mediterranean | L                                  | Yes       | 0                | 32.6[30.7,34.5] | 30.0[24.2,35.8] | 34.6[32.4,36.8] | 4.6[1.8,7.4]                                                    |
| Peru        | 2012 | Americas              | UM                                 | No        | 0                | 91.8[90.7,92.9] | 89.1[86.3,91.9] | 92.8[91.3,94.3] | 3.7[1.9,5.5]                                                    |
| Peru        | 2011 | Americas              | UM                                 | No        | 0                | 89.8[88.6,91.0] | 89.8[86.7,92.9] | 89.9[88.3,91.5] | 0.1[-1.8,2.0]                                                   |
| Peru        | 2010 | Americas              | UM                                 | No        | 0                | 86.2[85.0,87.4] | 84.2[81.1,87.3] | 87.0[85.4,88.6] | 2.8[0.9,4.7]                                                    |
| Peru        | 2009 | Americas              | UM                                 | No        | 0                | 84.4[83.2,85.6] | 83.0[79.9,86.1] | 85.9[84.3,87.5] | 2.9[1.0,4.8]                                                    |
| Peru        | 2007 | Americas              | LM                                 | No        | 0                | 81.3[80.2,82.4] | 78.8[76.3,81.3] | 82.4[81.1,83.7] | 3.6[2.0,5.2]                                                    |
| Philippines | 2017 | Western Pacific       | LM                                 | Yes       | 0                | 74.2[72.1,76.3] | 70.3[64.1,76.5] | 74.7[72.1,77.3] | 4.4[1.5,7.3]                                                    |
| Philippines | 2013 | Western Pacific       | LM                                 | Yes       | 0                | 60.2[58.3,62.1] | 58.2[53.0,63.4] | 61.8[59.5,64.1] | 3.6[0.8,6.4]                                                    |
| Philippines | 2008 | Western Pacific       | LM                                 | Yes       | 0                | 54.1[51.9,56.2] | 49.8[43.6,56.0] | 55.5[53.0,58.0] | 5.7[2.6,8.8]                                                    |

Appendix Table 8. Percentage of receiving a postnatal checkup within 24 hours of delivery among adolescents 15-19 years old and adult mothers 20-34 years old<sup>1</sup> (continued)

| Country               | Year | WHO region            | Income classification <sup>2</sup> | Countdown | SSA <sup>3</sup> | 15-34 (%)       | 15-19 (%)       | 20-34 (%)       | Absolute inequality between 20-34 and 15-19 (percentage points) |
|-----------------------|------|-----------------------|------------------------------------|-----------|------------------|-----------------|-----------------|-----------------|-----------------------------------------------------------------|
| Rwanda                | 2014 | Africa                | L                                  | Yes       | 1                | 38.5[37.4,39.6] | 35.3[32.5,38.1] | 38.6[37.4,39.8] | 3.3[1.9,4.7]                                                    |
| Rwanda                | 2010 | Africa                | L                                  | Yes       | 1                | 14.9[13.2,16.6] | 19.3[14.4,24.2] | 14.6[12.7,16.5] | -4.7[-7.0,-2.4]                                                 |
| Sao Tome and Principe | 2008 | Africa                | LM                                 | No        | 1                | 10.1[7.0,13.1]  | 10.0[3.5,16.5]  | 10.1[5.9,14.3]  | 0.1[-4.6,4.8]                                                   |
| Senegal               | 2017 | Africa                | L                                  | Yes       | 1                | 73.9[71.8,76.0] | 69.1[64.3,73.9] | 74.8[72.1,77.5] | 5.7[2.6,8.8]                                                    |
| Senegal               | 2016 | Africa                | L                                  | Yes       | 1                | 73.0[71.7,74.3] | 74.9[71.5,78.3] | 72.6[70.9,74.3] | -2.3[-4.4,-0.2]                                                 |
| Senegal               | 2010 | Africa                | LM                                 | Yes       | 1                | 61.0[59.6,62.4] | 55.8[52.1,59.5] | 61.2[59.3,63.1] | 5.4[3.1,7.7]                                                    |
| Senegal               | 2005 | Africa                | L                                  | Yes       | 1                | 84.4[82.7,86.1] | 83.0[78.9,87.1] | 85.9[83.8,88.0] | 2.9[0.3,5.5]                                                    |
| Sierra Leone          | 2013 | Africa                | L                                  | Yes       | 1                | 63.2[61.6,64.8] | 61.5[58.2,64.8] | 63.8[61.8,65.8] | 2.3[-0.1,4.7]                                                   |
| Sierra Leone          | 2008 | Africa                | L                                  | Yes       | 1                | 45.5[43.4,47.6] | 45.5[40.4,50.6] | 45.4[42.8,48.0] | -0.1[-3.4,3.2]                                                  |
| Tajikistan            | 2017 | Europe                | LM                                 | Yes       | 0                | 85.4[84.6,86.2] | 81.6[78.3,84.9] | 85.7[84.9,86.5] | 4.1[2.7,5.5]                                                    |
| Tajikistan            | 2012 | Europe                | L                                  | Yes       | 0                | 74.4[72.3,76.4] | 77.5[71.2,83.8] | 73.3[71.1,75.5] | -4.2[-6.9,-1.5]                                                 |
| Tanzania              | 2015 | Africa                | L                                  | Yes       | 1                | 30.8[29.1,32.5] | 30.1[26.1,34.1] | 30.9[28.7,33.1] | 0.8[-1.8,3.4]                                                   |
| Tanzania              | 2010 | Africa                | L                                  | Yes       | 1                | 26.1[24.6,27.6] | 27.2[22.9,31.5] | 25.7[23.7,27.7] | -1.5[-4.0,1.0]                                                  |
| Timor-Leste           | 2009 | South-East Asia       | LM                                 | Yes       | 0                | 21.5[20.5,22.5] | 19.3[16.1,22.5] | 23.3[22.2,24.4] | 4.0[2.6,5.4]                                                    |
| Togo                  | 2013 | Africa                | L                                  | Yes       | 1                | 61.7[59.9,63.5] | 57.8[52.5,63.1] | 63.7[61.5,65.9] | 5.9[3.1,8.7]                                                    |
| Uganda                | 2016 | Africa                | L                                  | Yes       | 1                | 51.5[50.2,52.8] | 49.6[46.9,52.3] | 52.2[50.7,53.7] | 2.6[0.8,4.4]                                                    |
| Uganda                | 2011 | Africa                | L                                  | Yes       | 1                | 29.5[27.4,31.6] | 27.8[23.1,32.5] | 30.3[27.8,32.8] | 2.5[-0.5,5.5]                                                   |
| Uganda                | 2006 | Africa                | L                                  | Yes       | 1                | 18.2[16.1,20.3] | 17.1[12.1,22.1] | 18.4[15.9,20.9] | 1.3[-1.9,4.5]                                                   |
| Ukraine               | 2007 | Europe                | LM                                 | No        | 0                | 54.4[53.9,54.9] | 47.0[45.1,48.9] | 55.8[55.3,56.3] | 8.8[7.9,9.7]                                                    |
| Yemen                 | 2013 | Eastern Mediterranean | LM                                 | Yes       | 0                | 18.3[17.0,19.7] | 18.1[14.3,21.9] | 18.4[16.8,20.0] | 0.3[-1.8,2.4]                                                   |
| Zambia                | 2013 | Africa                | LM                                 | Yes       | 1                | 61.6[60.2,63.0] | 61.2[58.4,64.0] | 63.2[61.5,64.9] | 2.0[0.0,4.0]                                                    |
| Zambia                | 2007 | Africa                | L                                  | Yes       | 1                | 35.8[33.5,38.1] | 35.0[29.8,40.2] | 36.1[33.3,38.9] | 1.1[-2.3,4.5]                                                   |
| Zimbabwe              | 2015 | Africa                | L                                  | Yes       | 1                | 48.9[46.8,51.0] | 47.6[42.8,52.4] | 49.6[47.1,52.1] | 2.0[-1.1,5.1]                                                   |
| Zimbabwe              | 2010 | Africa                | L                                  | Yes       | 1                | 23.1[20.9,25.3] | 18.7[13.8,23.6] | 23.6[21.0,26.2] | 4.9[1.8,8.0]                                                    |
| Zimbabwe              | 2005 | Africa                | L                                  | Yes       | 1                | 29.0[26.7,31.3] | 24.4[19.5,29.3] | 29.9[27.2,32.6] | 5.5[2.2,8.8]                                                    |



**Appendix Figure 1. Absolute inequality in maternal service coverage between adolescent mothers 15-19 years old and adult mothers 20-34 years old for the most recent years of data available**

**A) First antenatal care visit in the first trimester**

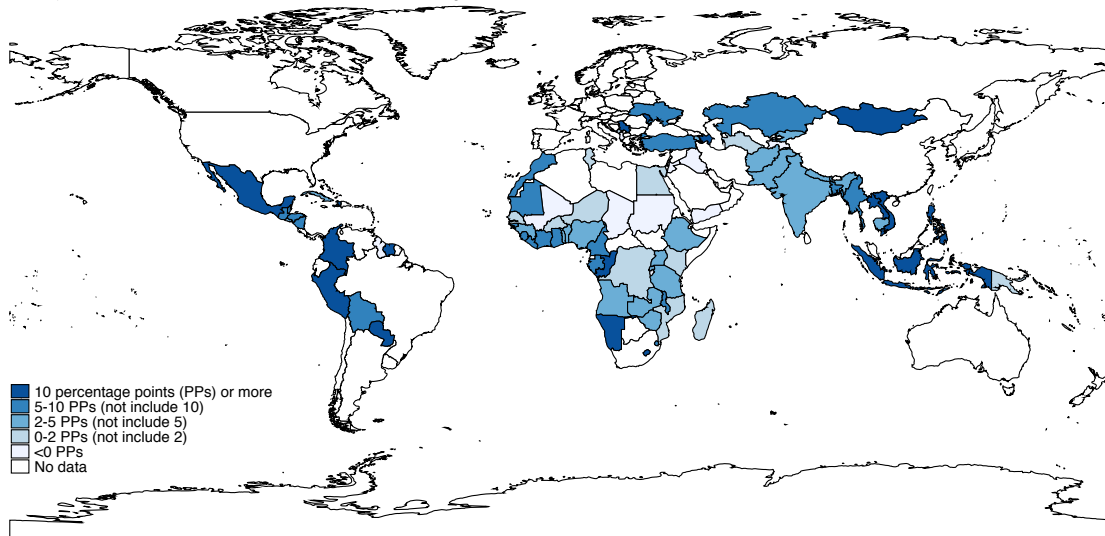

**B) Delivery in a health facility**

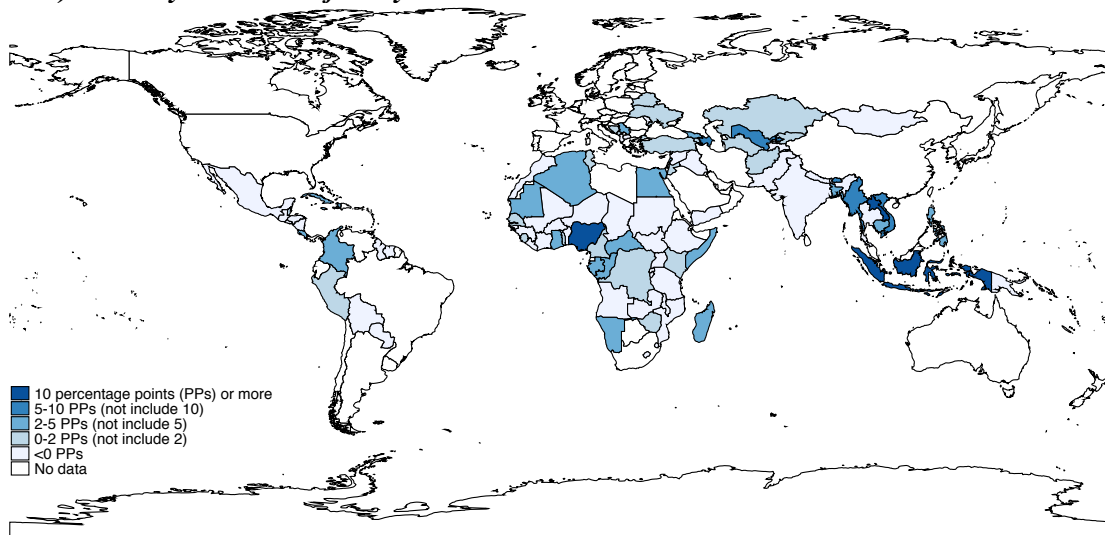

**Appendix Figure 2. Relative inequality in maternal service utilization between adolescent mothers 15-19 years old and adult mothers 20-34 years old, the latest years**

**A) Four or more times of antenatal care visits**

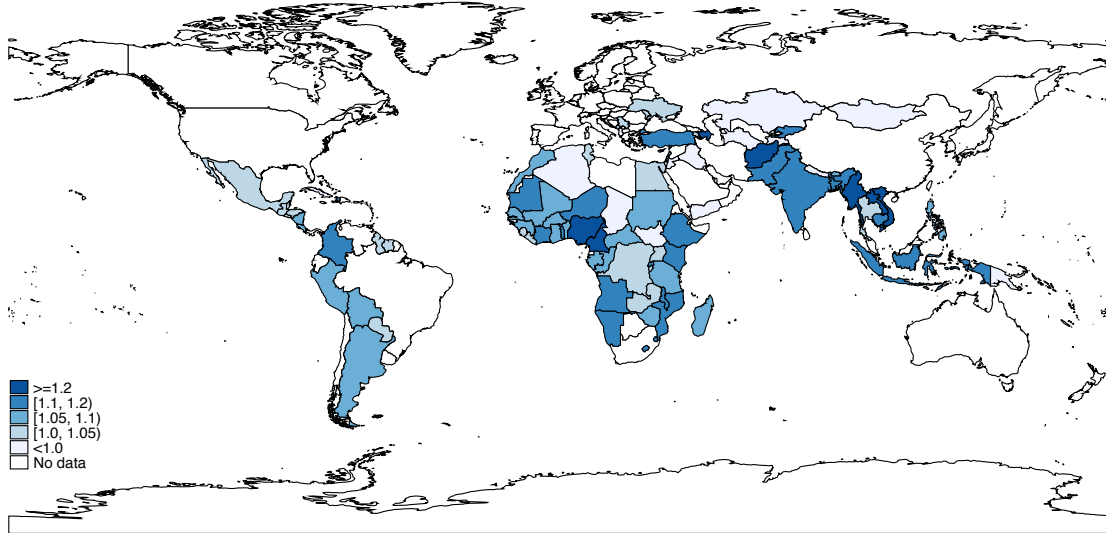

**B) First antenatal care visit in the first trimester**

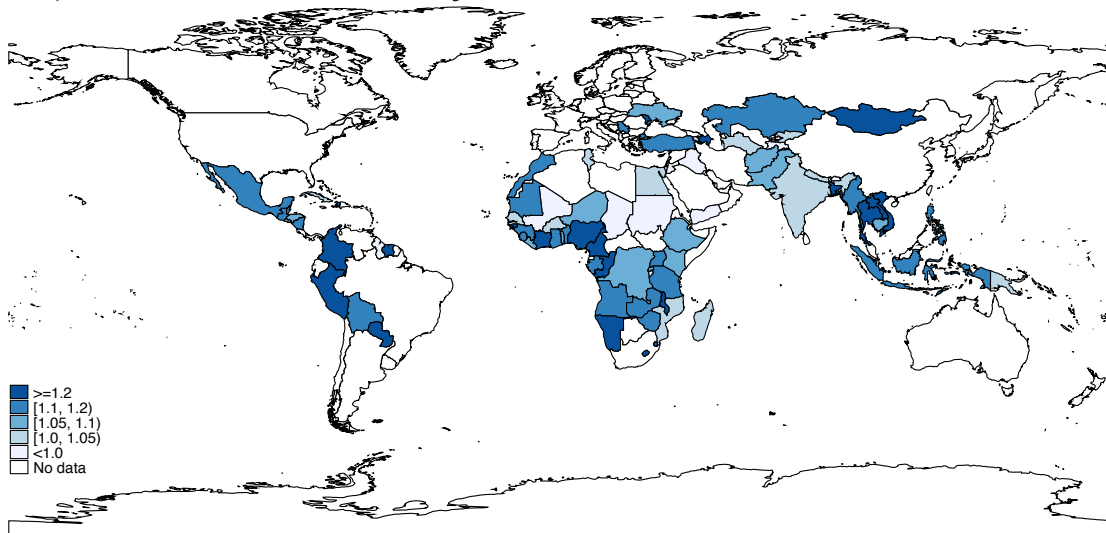

**C) Delivery with skilled birth attendant**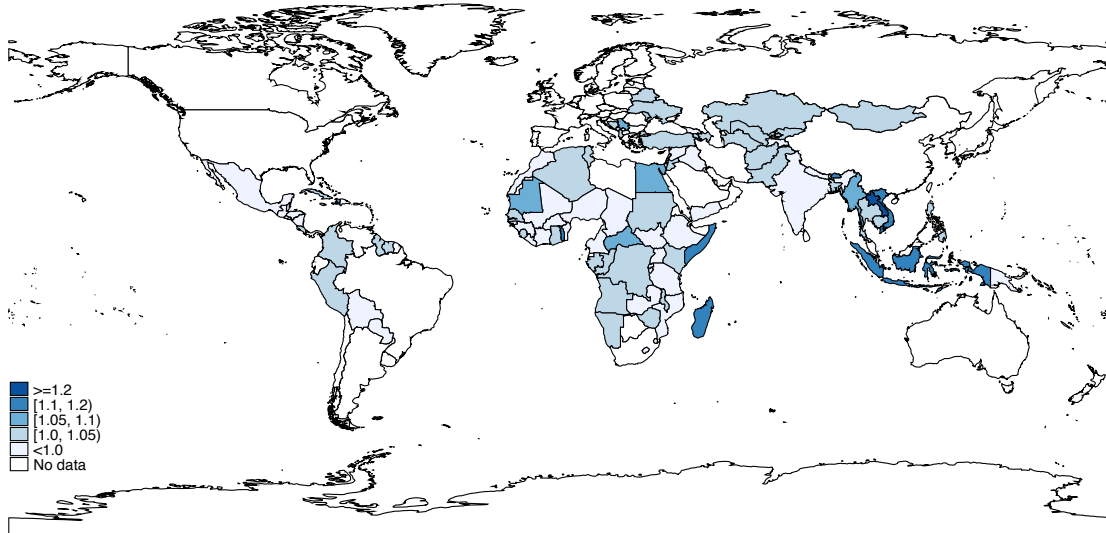**D) Delivery in health facility**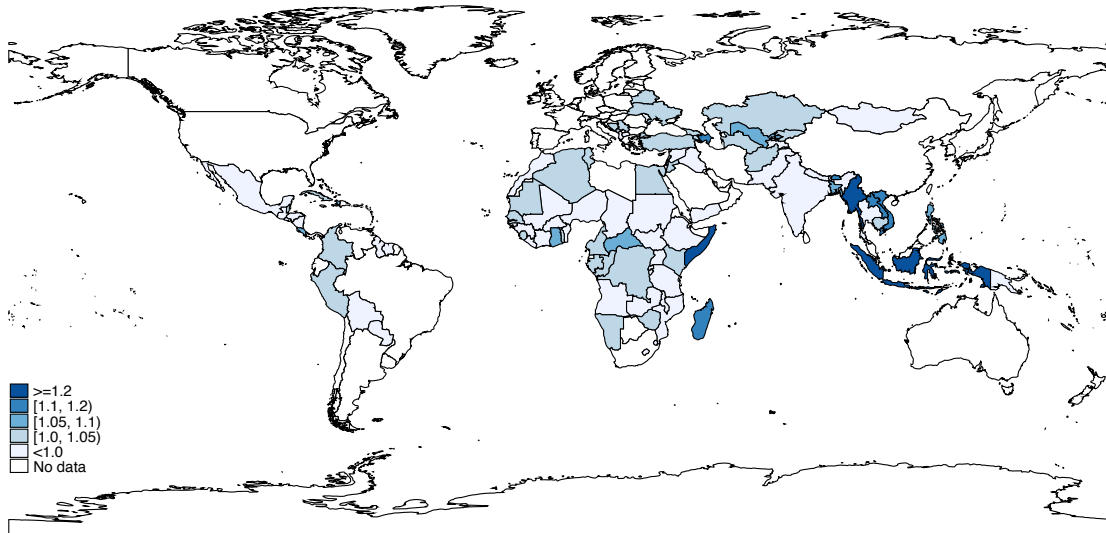

**E) Postnatal checkup within 24 hours after delivery**

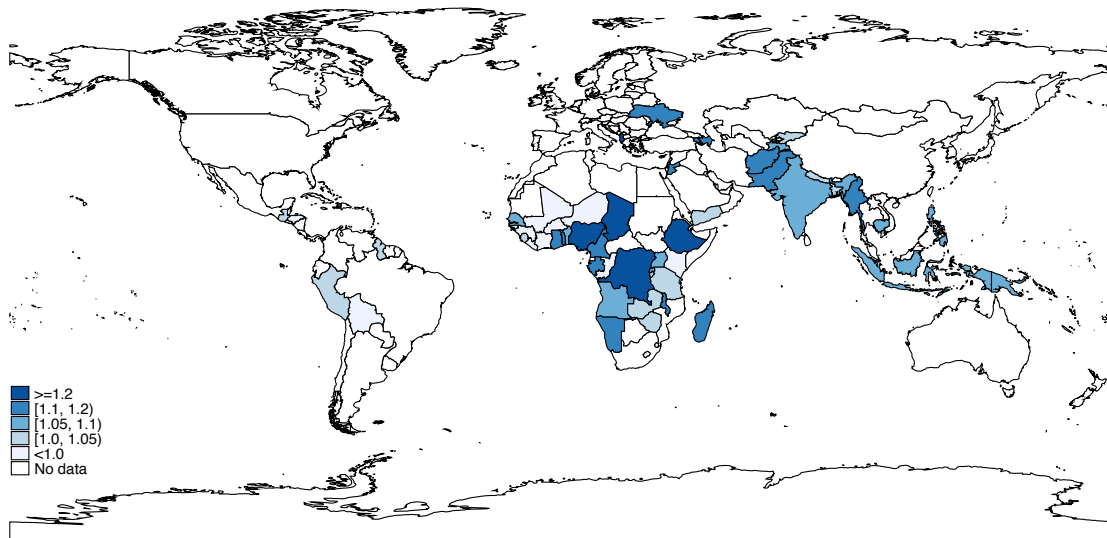

**Appendix Table 9. Changes in absolute inequality between adult and adolescents mothers of having four or more antenatal care visits at country-level, the latest year Vs. the earliest year<sup>1</sup>**

| Country                          | Absolute inequality, latest year (percentage points) | Absolute inequality, earliest year (percentage points) | Change in absolute inequality <sup>2</sup> |         | Absolute annual change (percentage points) |
|----------------------------------|------------------------------------------------------|--------------------------------------------------------|--------------------------------------------|---------|--------------------------------------------|
|                                  |                                                      |                                                        | Value (percentage points)                  | P value |                                            |
| Vietnam                          | 22.1                                                 | 0.7                                                    | 21.4                                       | 0.000   | 1.95                                       |
| Kyrgyzstan                       | 14.9                                                 | 0.7                                                    | 14.2                                       | 0.004   | 2.37                                       |
| Lao People's Democratic Republic | 14.3                                                 | 14.9                                                   | -0.6                                       | 0.990   | -0.10                                      |
| Nigeria                          | 13.7                                                 | 14.8                                                   | -1.1                                       | 0.602   | -0.08                                      |
| Cameroon                         | 10.2                                                 | 5.7                                                    | 4.5                                        | 0.026   | 0.45                                       |
| Namibia                          | 10.1                                                 | 5.1                                                    | 5.0                                        | 0.038   | 0.38                                       |
| Indonesia                        | 10.1                                                 | 7.6                                                    | 2.5                                        | 0.327   | 0.25                                       |
| Haiti                            | 8.9                                                  | 6.8                                                    | 2.1                                        | 0.453   | 0.13                                       |
| Mozambique                       | 8.8                                                  | 1.2                                                    | 7.6                                        | 0.032   | 0.95                                       |
| Cambodia                         | 8.2                                                  | 0.5                                                    | 7.7                                        | 0.033   | 0.55                                       |
| Lesotho                          | 8.0                                                  | 4.0                                                    | 4.0                                        | 0.235   | 0.29                                       |
| Côte d'Ivoire                    | 7.9                                                  | 3.9                                                    | 4.0                                        | 0.167   | 0.80                                       |
| Pakistan                         | 7.7                                                  | 8.4                                                    | -0.7                                       | 0.390   | -0.06                                      |
| Kenya                            | 7.7                                                  | 9.0                                                    | -1.3                                       | 0.909   | -0.12                                      |
| Philippines                      | 7.5                                                  | 2.9                                                    | 4.6                                        | 0.018   | 0.33                                       |
| Ghana                            | 7.3                                                  | 2.1                                                    | 5.2                                        | 0.011   | 0.47                                       |
| Rwanda                           | 7.2                                                  | -0.4                                                   | 7.6                                        | 0.038   | 0.54                                       |
| Malawi                           | 7.1                                                  | 0.8                                                    | 6.3                                        | 0.029   | 0.42                                       |
| Ethiopia                         | 7.0                                                  | 1.1                                                    | 5.9                                        | 0.018   | 0.37                                       |
| Congo                            | 6.9                                                  | 5.0                                                    | 1.9                                        | 0.303   | 0.21                                       |
| Peru                             | 6.0                                                  | 6.3                                                    | -0.3                                       | 0.840   | -0.03                                      |
| Sao Tome and Principe            | 5.6                                                  | -4.0                                                   | 9.6                                        | 0.010   | 1.60                                       |
| Zimbabwe                         | 5.3                                                  | 5.5                                                    | -0.2                                       | 0.790   | -0.01                                      |
| India                            | 5.1                                                  | 7.6                                                    | -2.5                                       | 0.102   | -0.28                                      |
| Timor-Leste                      | 5.0                                                  | 5.1                                                    | -0.1                                       | 0.751   | -0.01                                      |
| Tanzania                         | 4.0                                                  | -1.3                                                   | 5.3                                        | 0.011   | 0.48                                       |
| Afghanistan                      | 4.0                                                  | 3.3                                                    | 0.7                                        | 0.949   | 0.14                                       |
| Gabon                            | 3.9                                                  | 5.1                                                    | -1.2                                       | 0.745   | -0.10                                      |
| Dominican Republic               | 3.8                                                  | 2.8                                                    | 1.0                                        | 0.777   | 0.08                                       |
| Niger                            | 3.6                                                  | 4.1                                                    | -0.5                                       | 0.998   | -0.08                                      |
| Bangladesh                       | 3.6                                                  | 3.8                                                    | -0.2                                       | 0.595   | -0.02                                      |
| Honduras                         | 3.5                                                  | 4.6                                                    | -1.1                                       | 0.385   | -0.22                                      |
| Senegal                          | 3.3                                                  | 2.9                                                    | 0.4                                        | 0.934   | 0.03                                       |
| Benin                            | 3.1                                                  | 5.7                                                    | -2.6                                       | 0.148   | -0.15                                      |

**Note:**

1. We keep countries with the latest survey conducted in 2010 or later. The time elapsed between two surveys must be five years or more.
2. "Change in absolute inequality" is "Absolute inequality, latest year" minus "Absolute inequality, earliest year".

**Appendix Table 9. Changes in absolute inequality between adult and adolescents mothers of having four or more antenatal care visits at country-level, the latest year Vs. the earliest year<sup>1</sup> (continued)**

| Country                          | Absolute inequality, latest year (percentage points) | Absolute inequality, earliest year (percentage points) | Change in absolute inequality <sup>2</sup> |         | Absolute annual change (percentage points) |
|----------------------------------|------------------------------------------------------|--------------------------------------------------------|--------------------------------------------|---------|--------------------------------------------|
|                                  |                                                      |                                                        | Value (percentage points)                  | P value |                                            |
| Guyana                           | 3.0                                                  | 5.1                                                    | -2.1                                       | 0.130   | -0.42                                      |
| Burkina Faso                     | 2.6                                                  | 0.7                                                    | 1.9                                        | 0.590   | 0.27                                       |
| Uganda                           | 2.5                                                  | -0.7                                                   | 3.2                                        | 0.062   | 0.20                                       |
| Mali                             | 2.5                                                  | 2.4                                                    | 0.1                                        | 0.855   | 0.01                                       |
| Armenia                          | 2.1                                                  | 10.7                                                   | -8.6                                       | 0.001   | -0.57                                      |
| Maldives                         | 1.9                                                  | 2.5                                                    | -0.6                                       | 0.381   | -0.07                                      |
| Gambia                           | 1.9                                                  | 1.3                                                    | 0.6                                        | 0.713   | 0.08                                       |
| Democratic Republic of the Congo | 1.9                                                  | 0.0                                                    | 1.9                                        | 0.302   | 0.32                                       |
| Suriname                         | 1.8                                                  | -0.4                                                   | 2.2                                        | 0.099   | 0.28                                       |
| Guinea                           | 1.8                                                  | -0.5                                                   | 2.3                                        | 0.215   | 0.18                                       |
| Sierra Leone                     | 1.7                                                  | 0.7                                                    | 1.0                                        | 0.637   | 0.11                                       |
| Zambia                           | 1.6                                                  | 5.4                                                    | -3.8                                       | 0.104   | -0.32                                      |
| Burundi                          | 1.0                                                  | 2.9                                                    | -1.9                                       | 0.597   | -0.32                                      |
| Ukraine                          | 1.0                                                  | 2.9                                                    | -1.9                                       | 0.420   | -0.38                                      |
| Moldova                          | 0.8                                                  | 2.6                                                    | -1.8                                       | 0.372   | -0.26                                      |
| Egypt                            | 0.3                                                  | 6.3                                                    | -6.0                                       | 0.003   | -0.43                                      |
| Liberia                          | 0.2                                                  | 5.1                                                    | -4.9                                       | 0.020   | -0.82                                      |
| Chad                             | -0.4                                                 | 1.0                                                    | -1.4                                       | 0.467   | -0.14                                      |
| Jordan                           | -0.7                                                 | -0.7                                                   | 0.0                                        | 0.909   | 0.00                                       |
| Nepal                            | -0.8                                                 | -2.0                                                   | 1.2                                        | 0.945   | 0.08                                       |
| Mongolia                         | -0.9                                                 | -7.0                                                   | 6.1                                        | 0.027   | 0.76                                       |
| Kazakhstan                       | -2.0                                                 | 13.6                                                   | -15.6                                      | 0.000   | -3.12                                      |
| Albania                          | -4.1                                                 | 7.8                                                    | -11.9                                      | 0.000   | -1.32                                      |
| Tajikistan                       | -5.8                                                 | -5.2                                                   | -0.6                                       | 0.983   | -0.12                                      |
| Iraq                             | -8.2                                                 | -2.7                                                   | -5.5                                       | 0.028   | -0.79                                      |

**Appendix Table 10. Changes in absolute inequality between adult and adolescents mothers of receiving first antenatal care in the first trimester at country-level, the latest year Vs. the earliest year<sup>1</sup>**

| Country            | Absolute inequality, latest year (percentage points) | Absolute inequality, earliest year (percentage points) | Change in absolute inequality <sup>2</sup> |         | Absolute annual change (percentage points) |
|--------------------|------------------------------------------------------|--------------------------------------------------------|--------------------------------------------|---------|--------------------------------------------|
|                    |                                                      |                                                        | Value (percentage points)                  | P value |                                            |
| Vietnam            | 16.8                                                 | 7.0                                                    | 9.8                                        | 0.024   | 0.89                                       |
| Peru               | 14.5                                                 | 10.3                                                   | 4.2                                        | 0.051   | 0.35                                       |
| Lesotho            | 14.5                                                 | 9.0                                                    | 5.5                                        | 0.038   | 0.39                                       |
| Mongolia           | 14.2                                                 | 25.0                                                   | -10.8                                      | 0.000   | -1.35                                      |
| Namibia            | 13.0                                                 | 6.3                                                    | 6.7                                        | 0.032   | 0.52                                       |
| Haiti              | 12.5                                                 | 6.5                                                    | 6.0                                        | 0.033   | 0.38                                       |
| Indonesia          | 11.8                                                 | 7.8                                                    | 4.0                                        | 0.052   | 0.40                                       |
| Philippines        | 11.6                                                 | 6.9                                                    | 4.7                                        | 0.018   | 0.34                                       |
| Congo              | 10.5                                                 | 3.9                                                    | 6.6                                        | 0.011   | 0.73                                       |
| Gabon              | 9.8                                                  | 8.7                                                    | 1.1                                        | 0.303   | 0.09                                       |
| Ghana              | 9.6                                                  | 6.7                                                    | 2.9                                        | 0.056   | 0.26                                       |
| Dominican Republic | 9.3                                                  | 8.2                                                    | 1.1                                        | 0.949   | 0.09                                       |
| Côte d'Ivoire      | 8.0                                                  | 5.8                                                    | 2.2                                        | 0.239   | 0.44                                       |
| Timor-Leste        | 7.8                                                  | 7.8                                                    | 0.0                                        | 0.777   | 0.00                                       |
| Cameroon           | 6.3                                                  | 2.8                                                    | 3.5                                        | 0.327   | 0.35                                       |
| Honduras           | 6.1                                                  | 4.6                                                    | 1.5                                        | 0.934   | 0.30                                       |
| Sierra Leone       | 5.6                                                  | 3.7                                                    | 1.9                                        | 0.590   | 0.21                                       |
| Liberia            | 5.3                                                  | 6.8                                                    | -1.5                                       | 0.909   | -0.25                                      |
| Malawi             | 5.3                                                  | 1.9                                                    | 3.4                                        | 0.453   | 0.23                                       |
| Rwanda             | 5.0                                                  | 1.6                                                    | 3.4                                        | 0.235   | 0.24                                       |
| Zimbabwe           | 4.7                                                  | 4.3                                                    | 0.4                                        | 0.855   | 0.03                                       |
| Pakistan           | 4.4                                                  | 3.4                                                    | 1.0                                        | 0.713   | 0.08                                       |
| Cambodia           | 4.0                                                  | 7.1                                                    | -3.1                                       | 0.200   | -0.22                                      |
| Uganda             | 4.0                                                  | 0.5                                                    | 3.5                                        | 0.167   | 0.22                                       |
| Guinea             | 3.9                                                  | 1.6                                                    | 2.3                                        | 0.062   | 0.18                                       |
| Nigeria            | 3.8                                                  | 2.3                                                    | 1.5                                        | 0.302   | 0.12                                       |
| Kyrgyzstan         | 3.7                                                  | 6.6                                                    | -2.9                                       | 0.113   | -0.48                                      |
| Zambia             | 3.4                                                  | 2.6                                                    | 0.8                                        | 0.637   | 0.07                                       |
| Armenia            | 2.8                                                  | -2.2                                                   | 5.0                                        | 0.058   | 0.33                                       |
| India              | 2.6                                                  | 8.4                                                    | -5.8                                       | 0.039   | -0.64                                      |
| Nepal              | 2.5                                                  | 3.1                                                    | -0.6                                       | 0.840   | -0.04                                      |
| Ethiopia           | 2.5                                                  | 1.2                                                    | 1.3                                        | 0.909   | 0.08                                       |
| Tanzania           | 2.4                                                  | -0.3                                                   | 2.7                                        | 0.099   | 0.25                                       |
| Benin              | 2.2                                                  | 2.9                                                    | -0.7                                       | 0.790   | -0.04                                      |
| Maldives           | 2.1                                                  | 1.7                                                    | 0.4                                        | 0.945   | 0.05                                       |
| Niger              | 2.0                                                  | 5.9                                                    | -3.9                                       | 0.068   | -0.65                                      |

**Note:**

1. We keep countries with the latest survey conducted in 2010 or later. The time elapsed between two surveys must be five years or more.
2. "Change in absolute inequality" is "Absolute inequality, latest year" minus "Absolute inequality, earliest year".

**Appendix Table 10. Changes in absolute inequality between adult and adolescents mothers of receiving first antenatal care in the first trimester at country-level, the latest year Vs. the earliest year<sup>1</sup> (continued)**

| Country                          | Absolute inequality, latest year (percentage points) | Absolute inequality, earliest year (percentage points) | Change in absolute inequality <sup>2</sup> |         | Absolute annual change (percentage points) |
|----------------------------------|------------------------------------------------------|--------------------------------------------------------|--------------------------------------------|---------|--------------------------------------------|
|                                  |                                                      |                                                        | Value (percentage points)                  | P value |                                            |
| Egypt                            | 2.0                                                  | -0.4                                                   | 2.4                                        | 0.215   | 0.17                                       |
| Burkina Faso                     | 1.6                                                  | 0.6                                                    | 1.0                                        | 0.980   | 0.14                                       |
| Senegal                          | 1.4                                                  | 3.1                                                    | -1.7                                       | 0.751   | -0.14                                      |
| Democratic Republic of the Congo | 1.4                                                  | -0.4                                                   | 1.8                                        | 0.598   | 0.30                                       |
| Kenya                            | 1.3                                                  | -0.1                                                   | 1.4                                        | 0.388   | 0.13                                       |
| Mozambique                       | 0.4                                                  | 3.1                                                    | -2.7                                       | 0.067   | -0.34                                      |
| Chad                             | -0.1                                                 | 3.9                                                    | -4.0                                       | 0.114   | -0.40                                      |
| Albania                          | -0.1                                                 | 6.4                                                    | -6.5                                       | 0.014   | -0.72                                      |
| Mali                             | -0.3                                                 | 2.7                                                    | -3.0                                       | 0.076   | -0.18                                      |
| Guyana                           | -0.6                                                 | 6.6                                                    | -7.2                                       | 0.026   | -1.44                                      |
| Jordan                           | -0.9                                                 | 0.7                                                    | -1.6                                       | 0.745   | -0.10                                      |
| Tajikistan                       | -0.9                                                 | -5.1                                                   | 4.2                                        | 0.029   | 0.84                                       |
| Sao Tome and Principe            | -1.8                                                 | -9.5                                                   | 7.7                                        | 0.018   | 1.28                                       |
| Gambia                           | -2.6                                                 | 5.0                                                    | -7.6                                       | 0.021   | -1.52                                      |
| Burundi                          | -6.0                                                 | -3.3                                                   | -2.7                                       | 0.065   | -0.45                                      |



**Appendix Table 11. Changes in absolute inequality between adult and adolescents mothers of delivering with skilled birth attendants at country-level, the latest year Vs. the earliest year<sup>1</sup>**

| Country                          | Absolute inequality, latest year (percentage points) | Absolute inequality, earliest year (percentage points) | Change in absolute inequality <sup>2</sup> |         | Absolute annual change (percentage points) |
|----------------------------------|------------------------------------------------------|--------------------------------------------------------|--------------------------------------------|---------|--------------------------------------------|
|                                  |                                                      |                                                        | Value (percentage points)                  | P value |                                            |
| Nigeria                          | 16.1                                                 | 14.6                                                   | 1.5                                        | 0.553   | 0.10                                       |
| Lao People's Democratic Republic | 11.6                                                 | 3.1                                                    | 8.5                                        | 0.024   | 0.77                                       |
| Indonesia                        | 9.9                                                  | 11.9                                                   | -2.0                                       | 0.124   | -0.20                                      |
| Vietnam                          | 8.6                                                  | 13.0                                                   | -4.4                                       | 0.016   | -0.40                                      |
| Togo                             | 6.9                                                  | -6.2                                                   | 13.1                                       | 0.026   | 1.87                                       |
| Mauritania                       | 5.3                                                  | -1.9                                                   | 7.2                                        | 0.038   | 0.90                                       |
| Serbia                           | 5.1                                                  | 0.5                                                    | 4.6                                        | 0.032   | 0.51                                       |
| Myanmar                          | 4.1                                                  | 15.2                                                   | -11.1                                      | 0.000   | -1.85                                      |
| Jamaica                          | 4.0                                                  | 4.2                                                    | -0.2                                       | 0.745   | -0.03                                      |
| Namibia                          | 3.6                                                  | 0.0                                                    | 3.6                                        | 0.056   | 0.28                                       |
| Ghana                            | 3.5                                                  | 0.3                                                    | 3.2                                        | 0.239   | 0.29                                       |
| Pakistan                         | 3.2                                                  | 2.7                                                    | 0.5                                        | 0.303   | 0.04                                       |
| Haiti                            | 3.2                                                  | -5.0                                                   | 8.2                                        | 0.033   | 0.51                                       |
| Congo                            | 3.2                                                  | 0.8                                                    | 2.4                                        | 0.327   | 0.27                                       |
| Philippines                      | 2.8                                                  | 7.3                                                    | -4.5                                       | 0.026   | -0.32                                      |
| Peru                             | 2.8                                                  | 4.7                                                    | -1.9                                       | 0.998   | -0.16                                      |
| Senegal                          | 2.2                                                  | 2.7                                                    | -0.5                                       | 0.595   | -0.04                                      |
| Zimbabwe                         | 2.0                                                  | 2.2                                                    | -0.2                                       | 0.381   | -0.01                                      |
| Bangladesh                       | 2.0                                                  | 2.7                                                    | -0.7                                       | 0.385   | -0.07                                      |
| Kenya                            | 2.0                                                  | -3.7                                                   | 5.7                                        | 0.018   | 0.52                                       |
| Algeria                          | 2.0                                                  | 13.2                                                   | -11.2                                      | 0.000   | -1.87                                      |
| Gabon                            | 1.9                                                  | -0.8                                                   | 2.7                                        | 0.453   | 0.22                                       |
| Afghanistan                      | 1.8                                                  | 0.7                                                    | 1.1                                        | 0.949   | 0.22                                       |
| Ukraine                          | 1.7                                                  | 0.7                                                    | 1.0                                        | 0.777   | 0.14                                       |
| Sierra Leone                     | 1.7                                                  | -5.0                                                   | 6.7                                        | 0.011   | 0.56                                       |
| Jordan                           | 1.6                                                  | 0.9                                                    | 0.7                                        | 0.590   | 0.04                                       |
| Cambodia                         | 1.6                                                  | -0.4                                                   | 2.0                                        | 0.934   | 0.14                                       |
| Lebanon                          | 1.5                                                  | 0.2                                                    | 1.3                                        | 0.855   | 0.22                                       |
| Maldives                         | 1.4                                                  | 3.8                                                    | -2.4                                       | 0.101   | -0.30                                      |
| Kazakhstan                       | 1.2                                                  | 0.9                                                    | 0.3                                        | 0.713   | 0.03                                       |
| Dominican Republic               | 1.1                                                  | -0.3                                                   | 1.4                                        | 0.302   | 0.12                                       |

**Note:**

1. We keep countries with the latest survey conducted in 2010 or later. The time elapsed between two surveys must be five years or more.
2. "Change in absolute inequality" is "Absolute inequality, latest year" minus "Absolute inequality, earliest year".

**Appendix Table 11. Changes in absolute inequality between adult and adolescents mothers of delivering with skilled birth attendants at country-level, the latest year Vs. the earliest year<sup>1</sup> (continued)**

| Country                          | Absolute inequality, latest year (percentage points) | Absolute inequality, earliest year (percentage points) | Change in absolute inequality <sup>2</sup> |         | Absolute annual change (percentage points) |
|----------------------------------|------------------------------------------------------|--------------------------------------------------------|--------------------------------------------|---------|--------------------------------------------|
|                                  |                                                      |                                                        | Value (percentage points)                  | P value |                                            |
| Belize                           | 1.0                                                  | -1.0                                                   | 2.0                                        | 0.909   | 0.22                                       |
| Turkmenistan                     | 1.0                                                  | 0.2                                                    | 0.8                                        | 0.637   | 0.09                                       |
| Belarus                          | 0.9                                                  | 1.0                                                    | -0.1                                       | 0.597   | -0.01                                      |
| Kyrgyzstan                       | 0.9                                                  | -1.5                                                   | 2.4                                        | 0.235   | 0.18                                       |
| Democratic Republic of the Congo | 0.9                                                  | 12.3                                                   | -11.4                                      | 0.000   | -0.95                                      |
| Armenia                          | 0.8                                                  | 0.6                                                    | 0.2                                        | 0.945   | 0.01                                       |
| Albania                          | 0.7                                                  | 0.8                                                    | -0.1                                       | 0.420   | -0.01                                      |
| Suriname                         | 0.5                                                  | 1.2                                                    | -0.7                                       | 0.467   | -0.06                                      |
| Malawi                           | 0.5                                                  | -3.7                                                   | 4.2                                        | 0.038   | 0.28                                       |
| Thailand                         | 0.5                                                  | 0.6                                                    | -0.1                                       | 0.372   | -0.01                                      |
| Moldova                          | 0.4                                                  | 0.5                                                    | -0.1                                       | 0.983   | -0.01                                      |
| Guyana                           | 0.3                                                  | -0.6                                                   | 0.9                                        | 0.980   | 0.11                                       |
| Mongolia                         | 0.2                                                  | 0.6                                                    | -0.4                                       | 0.544   | -0.03                                      |
| Chad                             | 0.0                                                  | -0.4                                                   | 0.4                                        | 0.598   | 0.04                                       |
| Sao Tome and Principe            | -0.1                                                 | -3.1                                                   | 3.0                                        | 0.167   | 0.50                                       |
| Cameroon                         | -0.4                                                 | 3.2                                                    | -3.6                                       | 0.121   | -0.36                                      |
| Iraq                             | -0.7                                                 | -1.3                                                   | 0.6                                        | 0.388   | 0.05                                       |
| Burkina Faso                     | -0.8                                                 | 3.6                                                    | -4.4                                       | 0.008   | -0.63                                      |
| Tajikistan                       | -0.8                                                 | -9.2                                                   | 8.4                                        | 0.029   | 0.70                                       |
| India                            | -1.0                                                 | 1.3                                                    | -2.3                                       | 0.154   | -0.26                                      |
| Lesotho                          | -1.0                                                 | -1.8                                                   | 0.8                                        | 0.900   | 0.06                                       |
| Honduras                         | -1.2                                                 | -2.8                                                   | 1.6                                        | 0.832   | 0.32                                       |
| Gambia                           | -2.0                                                 | -3.8                                                   | 1.8                                        | 0.783   | 0.14                                       |
| Rwanda                           | -2.1                                                 | -8.6                                                   | 6.5                                        | 0.018   | 0.46                                       |
| Côte d'Ivoire                    | -2.3                                                 | -3.6                                                   | 1.3                                        | 0.745   | 0.13                                       |
| Burundi                          | -2.9                                                 | -5.7                                                   | 2.8                                        | 0.062   | 0.25                                       |
| Mali                             | -2.9                                                 | -2.7                                                   | -0.2                                       | 0.756   | -0.01                                      |
| Tanzania                         | -3.0                                                 | -2.1                                                   | -0.9                                       | 0.671   | -0.08                                      |
| Guinea                           | -3.0                                                 | -5.5                                                   | 2.5                                        | 0.099   | 0.19                                       |
| Niger                            | -3.1                                                 | 1.3                                                    | -4.4                                       | 0.020   | -0.73                                      |
| Uganda                           | -3.1                                                 | -9.5                                                   | 6.4                                        | 0.010   | 0.40                                       |
| Benin                            | -3.6                                                 | 2.5                                                    | -6.1                                       | 0.038   | -0.36                                      |
| Ethiopia                         | -4.0                                                 | 1.1                                                    | -5.1                                       | 0.016   | -0.32                                      |
| Liberia                          | -4.2                                                 | -2.2                                                   | -2.0                                       | 0.552   | -0.33                                      |
| Zambia                           | -4.5                                                 | -0.1                                                   | -4.4                                       | 0.032   | -0.37                                      |
| Yemen                            | -5.0                                                 | 0.0                                                    | -5.0                                       | 0.007   | -0.71                                      |
| Mozambique                       | -5.8                                                 | -5.7                                                   | -0.1                                       | 0.915   | -0.01                                      |
| Nepal                            | -6.4                                                 | -3.6                                                   | -2.8                                       | 0.061   | -0.19                                      |
| Guinea-Bissau                    | -8.2                                                 | -6.8                                                   | -1.4                                       | 0.357   | -0.17                                      |

**Appendix Table 12. Changes in absolute inequality between adult and adolescents mothers of delivering in a health facility at country-level, the latest year Vs. the earliest year<sup>1</sup>**

| Country                          | Absolute inequality, latest year (percentage points) | Absolute inequality, earliest year (percentage points) | Change in absolute inequality <sup>2</sup> |         | Absolute annual change (percentage points) |
|----------------------------------|------------------------------------------------------|--------------------------------------------------------|--------------------------------------------|---------|--------------------------------------------|
|                                  |                                                      |                                                        | Value (percentage points)                  | P value |                                            |
| Nigeria                          | 13.9                                                 | 15.2                                                   | -1.3                                       | 0.602   | -0.09                                      |
| Indonesia                        | 12.0                                                 | 14.1                                                   | -2.1                                       | 0.086   | -0.21                                      |
| Lao People's Democratic Republic | 11.1                                                 | 0.7                                                    | 10.4                                       | 0.024   | 0.95                                       |
| Vietnam                          | 9.9                                                  | 15.3                                                   | -5.4                                       | 0.014   | -0.49                                      |
| Lebanon                          | 4.2                                                  | 4.4                                                    | -0.2                                       | 0.390   | -0.03                                      |
| Philippines                      | 3.9                                                  | 6.0                                                    | -2.1                                       | 0.196   | -0.15                                      |
| Serbia                           | 3.9                                                  | 0.3                                                    | 3.6                                        | 0.143   | 0.40                                       |
| Ghana                            | 3.7                                                  | 0.6                                                    | 3.1                                        | 0.052   | 0.28                                       |
| Bangladesh                       | 3.4                                                  | 2.1                                                    | 1.3                                        | 0.374   | 0.13                                       |
| Congo                            | 3.1                                                  | -2.4                                                   | 5.5                                        | 0.026   | 0.61                                       |
| Namibia                          | 3.1                                                  | 0.6                                                    | 2.5                                        | 0.056   | 0.19                                       |
| Gabon                            | 2.9                                                  | -2.3                                                   | 5.2                                        | 0.038   | 0.43                                       |
| Haiti                            | 2.8                                                  | -4.7                                                   | 7.5                                        | 0.032   | 0.47                                       |
| Mauritania                       | 2.5                                                  | -3.9                                                   | 6.4                                        | 0.033   | 0.80                                       |
| Jamaica                          | 2.5                                                  | 1.2                                                    | 1.3                                        | 0.553   | 0.22                                       |
| Algeria                          | 2.3                                                  | 12.8                                                   | -10.5                                      | 0.000   | -1.75                                      |
| Cambodia                         | 2.2                                                  | 0.2                                                    | 2.0                                        | 0.303   | 0.14                                       |
| Jordan                           | 2.0                                                  | 1.2                                                    | 0.8                                        | 0.949   | 0.05                                       |
| Peru                             | 2.0                                                  | 5.6                                                    | -3.6                                       | 0.102   | -0.30                                      |
| Kenya                            | 1.8                                                  | -3.9                                                   | 5.7                                        | 0.018   | 0.52                                       |
| Turkmenistan                     | 1.7                                                  | -1.4                                                   | 3.1                                        | 0.239   | 0.34                                       |
| Zimbabwe                         | 1.6                                                  | 2.4                                                    | -0.8                                       | 0.909   | -0.06                                      |
| Ukraine                          | 1.5                                                  | 0.6                                                    | 0.9                                        | 0.777   | 0.13                                       |
| Armenia                          | 1.5                                                  | 8.1                                                    | -6.6                                       | 0.028   | -0.44                                      |
| Togo                             | 1.2                                                  | -1.8                                                   | 3.0                                        | 0.327   | 0.43                                       |
| Afghanistan                      | 1.2                                                  | 0.4                                                    | 0.8                                        | 0.934   | 0.16                                       |
| Kazakhstan                       | 1.1                                                  | 0.7                                                    | 0.4                                        | 0.590   | 0.04                                       |
| Belize                           | 1.0                                                  | -1.9                                                   | 2.9                                        | 0.453   | 0.32                                       |
| Kyrgyzstan                       | 0.7                                                  | 2.5                                                    | -1.8                                       | 0.840   | -0.14                                      |
| Cameroon                         | 0.5                                                  | 2.8                                                    | -2.3                                       | 0.148   | -0.23                                      |
| Sierra Leone                     | 0.5                                                  | 1.1                                                    | -0.6                                       | 0.790   | -0.05                                      |
| Senegal                          | 0.4                                                  | 3.3                                                    | -2.9                                       | 0.130   | -0.24                                      |

**Note:**

1. We keep countries with the latest survey conducted in 2010 or later. The time elapsed between two surveys must be five years or more.
2. "Change in absolute inequality" is "Absolute inequality, latest year" minus "Absolute inequality, earliest year".

**Appendix Table 12. Changes in absolute inequality between adult and adolescents mothers of delivering in a health facility at country-level, the latest year Vs. the earliest year<sup>1</sup> (continued)**

| Country                          | Absolute inequality, latest year (percentage points) | Absolute inequality, earliest year (percentage points) | Change in absolute inequality <sup>2</sup> |         | Absolute annual change (percentage points) |
|----------------------------------|------------------------------------------------------|--------------------------------------------------------|--------------------------------------------|---------|--------------------------------------------|
|                                  |                                                      |                                                        | Value (percentage points)                  | P value |                                            |
| Democratic Republic of the Congo | 0.2                                                  | -0.4                                                   | 0.6                                        | 0.855   | 0.10                                       |
| Moldova                          | 0.0                                                  | -0.3                                                   | 0.3                                        | 0.713   | 0.04                                       |
| Thailand                         | -0.1                                                 | 0.0                                                    | -0.1                                       | 0.751   | -0.01                                      |
| Dominican Republic               | -0.2                                                 | 0.4                                                    | -0.6                                       | 0.745   | -0.05                                      |
| Albania                          | -0.3                                                 | 1.4                                                    | -1.7                                       | 0.998   | -0.19                                      |
| Malawi                           | -0.5                                                 | -1.5                                                   | 1.0                                        | 0.302   | 0.07                                       |
| Chad                             | -0.8                                                 | -1.8                                                   | 1.0                                        | 0.637   | 0.10                                       |
| Sao Tome and Principe            | -1.0                                                 | -3.8                                                   | 2.8                                        | 0.235   | 0.47                                       |
| Mongolia                         | -1.0                                                 | 1.1                                                    | -2.1                                       | 0.104   | -0.16                                      |
| Burkina Faso                     | -1.0                                                 | 0.4                                                    | -1.4                                       | 0.595   | -0.20                                      |
| India                            | -1.1                                                 | 2.8                                                    | -3.9                                       | 0.182   | -0.43                                      |
| Honduras                         | -1.4                                                 | -2.8                                                   | 1.4                                        | 0.909   | 0.28                                       |
| Guyana                           | -1.4                                                 | -1.3                                                   | -0.1                                       | 0.385   | -0.01                                      |
| Iraq                             | -1.6                                                 | -6.8                                                   | 5.2                                        | 0.011   | 0.43                                       |
| Guinea                           | -1.9                                                 | -3.9                                                   | 2.0                                        | 0.945   | 0.15                                       |
| Rwanda                           | -2.1                                                 | -8.7                                                   | 6.6                                        | 0.038   | 0.47                                       |
| Suriname                         | -2.1                                                 | 0.9                                                    | -3.0                                       | 0.062   | -0.25                                      |
| Yemen                            | -2.2                                                 | 0.4                                                    | -2.6                                       | 0.124   | -0.37                                      |
| Côte d'Ivoire                    | -2.4                                                 | -5.1                                                   | 2.7                                        | 0.167   | 0.27                                       |
| Maldives                         | -2.5                                                 | 4.6                                                    | -7.1                                       | 0.003   | -0.89                                      |
| Niger                            | -2.9                                                 | 1.2                                                    | -4.1                                       | 0.016   | -0.68                                      |
| Tanzania                         | -2.9                                                 | -2.2                                                   | -0.7                                       | 0.381   | -0.06                                      |
| Gambia                           | -3.0                                                 | -5.2                                                   | 2.2                                        | 0.062   | 0.17                                       |
| Tajikistan                       | -3.1                                                 | -23.4                                                  | 20.3                                       | 0.000   | 1.69                                       |
| Burundi                          | -3.1                                                 | 1.0                                                    | -4.1                                       | 0.008   | -0.37                                      |
| Mali                             | -3.2                                                 | -2.5                                                   | -0.7                                       | 0.597   | -0.04                                      |
| Lesotho                          | -3.4                                                 | -2.7                                                   | -0.7                                       | 0.420   | -0.05                                      |
| Ethiopia                         | -4.0                                                 | 1.2                                                    | -5.2                                       | 0.026   | -0.33                                      |
| Uganda                           | -4.2                                                 | -10.2                                                  | 6.0                                        | 0.029   | 0.38                                       |
| Benin                            | -4.3                                                 | 0.6                                                    | -4.9                                       | 0.035   | -0.29                                      |
| Liberia                          | -4.8                                                 | 0.4                                                    | -5.2                                       | 0.008   | -0.87                                      |
| Zambia                           | -4.8                                                 | -0.3                                                   | -4.5                                       | 0.008   | -0.38                                      |
| Mozambique                       | -5.1                                                 | -6.2                                                   | 1.1                                        | 0.980   | 0.14                                       |
| Nepal                            | -6.4                                                 | -2.2                                                   | -4.2                                       | 0.020   | -0.28                                      |
| Guinea-Bissau                    | -7.7                                                 | -7.5                                                   | -0.2                                       | 0.372   | -0.03                                      |
| Pakistan                         | -7.8                                                 | 4.4                                                    | -12.2                                      | 0.000   | -1.02                                      |

**Appendix Table 13. Changes in absolute inequality between adult and adolescents mothers of receiving postnatal checkup within 24 hours after delivery at country-level, the latest year Vs. the earliest year<sup>1</sup>**

| Country            | Absolute inequality, latest year (percentage points) | Absolute inequality, earliest year (percentage points) | Change in absolute inequality <sup>2</sup> |         | Absolute annual change (percentage points) |
|--------------------|------------------------------------------------------|--------------------------------------------------------|--------------------------------------------|---------|--------------------------------------------|
|                    |                                                      |                                                        | Value (percentage points)                  | P value |                                            |
| Albania            | 14.4                                                 | 3.6                                                    | 10.8                                       | 0.024   | 1.20                                       |
| Nigeria            | 12.1                                                 | 11.0                                                   | 1.1                                        | 0.583   | 0.11                                       |
| Pakistan           | 10.1                                                 | 4.6                                                    | 5.5                                        | 0.026   | 0.46                                       |
| Namibia            | 7.9                                                  | 6.8                                                    | 1.1                                        | 0.480   | 0.16                                       |
| Ghana              | 7.7                                                  | 10.2                                                   | -2.5                                       | 0.188   | -0.42                                      |
| Jordan             | 7.2                                                  | 4.3                                                    | 2.9                                        | 0.360   | 0.26                                       |
| Armenia            | 7.0                                                  | 1.8                                                    | 5.2                                        | 0.038   | 0.52                                       |
| Dominican Republic | 6.4                                                  | 3.6                                                    | 2.8                                        | 0.261   | 0.47                                       |
| Cambodia           | 6.2                                                  | 1.3                                                    | 4.9                                        | 0.032   | 0.54                                       |
| Senegal            | 5.7                                                  | 2.9                                                    | 2.8                                        | 0.143   | 0.23                                       |
| Ethiopia           | 5.6                                                  | 1.0                                                    | 4.6                                        | 0.033   | 0.42                                       |
| Malawi             | 5.2                                                  | 0.8                                                    | 4.4                                        | 0.018   | 0.88                                       |
| Philippines        | 4.4                                                  | 5.7                                                    | -1.3                                       | 0.958   | -0.14                                      |
| Tajikistan         | 4.1                                                  | -4.2                                                   | 8.3                                        | 0.011   | 1.66                                       |
| Peru               | 3.7                                                  | 3.6                                                    | 0.1                                        | 0.318   | 0.02                                       |
| Uganda             | 2.6                                                  | 1.3                                                    | 1.3                                        | 0.374   | 0.13                                       |
| Benin              | 2.5                                                  | -0.1                                                   | 2.6                                        | 0.052   | 0.37                                       |
| Sierra Leone       | 2.3                                                  | -0.1                                                   | 2.4                                        | 0.056   | 0.48                                       |
| Zambia             | 2.0                                                  | 1.1                                                    | 0.9                                        | 0.553   | 0.15                                       |
| Zimbabwe           | 2.0                                                  | 5.5                                                    | -3.5                                       | 0.113   | -0.35                                      |
| Burundi            | 1.9                                                  | -1.2                                                   | 3.1                                        | 0.239   | 0.52                                       |
| India              | 1.6                                                  | 4.8                                                    | -3.2                                       | 0.171   | -0.36                                      |
| Nepal              | 1.4                                                  | -1.4                                                   | 2.8                                        | 0.327   | 0.28                                       |
| Tanzania           | 0.8                                                  | -1.5                                                   | 2.3                                        | 0.453   | 0.46                                       |
| Bangladesh         | 0.5                                                  | 3.4                                                    | -2.9                                       | 0.140   | -0.41                                      |
| Guinea             | -0.2                                                 | 0.0                                                    | -0.2                                       | 0.784   | -0.03                                      |
| Mali               | -0.4                                                 | 2.4                                                    | -2.8                                       | 0.051   | -0.47                                      |
| Kenya              | -0.8                                                 | 1.2                                                    | -2.0                                       | 0.123   | -0.33                                      |
| Liberia            | -1.7                                                 | 0.5                                                    | -2.2                                       | 0.182   | -0.37                                      |
| Lesotho            | -1.7                                                 | 2.9                                                    | -4.6                                       | 0.039   | -0.92                                      |
| Honduras           | -3.4                                                 | -0.8                                                   | -2.6                                       | 0.190   | -0.52                                      |
| Maldives           | -8.5                                                 | -8.9                                                   | 0.4                                        | 0.303   | 0.05                                       |

**Note:**

1. We keep countries with the latest survey conducted in 2010 or later. The time elapsed between two surveys must be five years or more.
2. “Change in absolute inequality” is “Absolute inequality, latest year” minus “Absolute inequality, earliest year”.
